# Supplementary material for: Nigral transcriptomic profiles in Engrailed-1 hemizygous mouse models of Parkinson’s disease reveal upregulation of oxidative phosphorylation-related genes associated with delayed dopaminergic neurodegeneration
Source: Front Aging Neurosci. 2024 Feb 5;16:1337365. doi: 10.3389/fnagi.2024.1337365 (PMC10875038; doi:10.3389/fnagi.2024.1337365)
Supplement: Supplementary file 3 [file Table_1.XLSX]

## Sheet: DEGs SwissOF1 En1 vs WT 
	baseMean	log2FoldChange	lfcSE	pvalue	padj	symbol	entrez	geneID	biotype
ENSMUSG00000004872	13.7470987429366	28.73492225943	3.47737330637893	3.1318793240596e-17	5.50271197237272e-13	Pax3	18505	paired box 3	protein-coding
ENSMUSG00000015619	232.636299791191	24.7230461976386	3.32012487485459	3.13872617666938e-14	1.83824729746936e-10	Gata3	14462	GATA binding protein 3	protein-coding
ENSMUSG00000037727	122.244543562813	19.7306996842722	2.85002738740676	2.17050521551991e-12	9.53394415917119e-09	Avp	11998	arginine vasopressin	protein-coding
ENSMUSG00000118653	89.9752389295739	-20.482341423221	3.18883112898076	6.09382457100059e-11	1.78447496187467e-07	Gm2296	100039535	ubiquitin-conjugating enzyme E2S pseudogene	pseudo
ENSMUSG00000061762	3615.06360219301	-3.79592885678982	0.699288615310045	6.84974489894585e-10	1.71928596963541e-06	Tac1	21333	tachykinin 1	protein-coding
ENSMUSG00000029361	1255.86555498169	-2.82197103526139	0.550938038627313	1.46734649191755e-09	3.22265973287393e-06	Nos1	18125	nitric oxide synthase 1, neuronal	protein-coding
ENSMUSG00000091402	53.0537816912296	22.7693874427722	4.02707856780942	5.04286938233699e-09	9.84480167196232e-06	Rd3l	217874	retinal degeneration 3-like	protein-coding
ENSMUSG00000078087	228.582698104803	22.5783278301276	4.220705419384	2.1065851687428e-08	3.36479103771008e-05	Rps12l1	672959	ribosomal protein S12-like 1	pseudo
ENSMUSG00000035513	141.042812471189	-6.01875831341589	1.33474116918758	2.7088013146557e-08	3.96613659154172e-05	Ntng2	171171	netrin G2	protein-coding
ENSMUSG00000057000	90.921484615362	-22.3205151915976	4.24062094313115	2.99301798221812e-08	4.04517891904403e-05	Nxf3	245610	nuclear RNA export factor 3	protein-coding
ENSMUSG00000025013	132.052050076042	-4.4684879084079	0.964524132861481	3.69841318070184e-08	4.20460390923032e-05	Tll2	24087	tolloid-like 2	protein-coding
ENSMUSG00000005994	65.088389179799	22.1456965470926	4.25789805731801	3.78958093345031e-08	4.20460390923032e-05	Tyrp1	22178	tyrosinase-related protein 1	protein-coding
ENSMUSG00000050100	55.5729572608341	-22.1372683294418	4.25858397403359	3.82889371358481e-08	4.20460390923032e-05	Hmx2	15372	H6 homeobox 2	protein-coding
ENSMUSG00000031558	891.132800362057	-2.76012333181559	0.656058772508798	8.9330403961141e-08	9.23255998586616e-05	Slit2	20563	slit guidance ligand 2	protein-coding
ENSMUSG00000029765	2125.65869440776	-1.02397922429141	0.272677961598257	1.6373152756444e-07	0.000159820163294845	Plxna4	243743	plexin A4	protein-coding
ENSMUSG00000037583	29.5778623095818	20.6579122008304	4.57795908593862	2.34172029603449e-07	0.000216547503164874	Nr0b2	23957	nuclear receptor subfamily 0, group B, member 2	protein-coding
ENSMUSG00000044548	151.733973449363	-2.62914611675183	0.694407117088919	3.74725191860486e-07	0.00031352007718994	Dact1	59036	dishevelled-binding antagonist of beta-catenin 1	protein-coding
ENSMUSG00000024538	801.875184258708	0.991226635702814	0.277297222619317	3.95100567335668e-07	0.000315541680367623	Ppic	19038	peptidylprolyl isomerase C	protein-coding
ENSMUSG00000032870	1085.37452905832	-0.683525668622181	0.161137713353269	4.86580375067281e-07	0.000371705095214441	Smap2	69780	small ArfGAP 2	protein-coding
ENSMUSG00000024734	54.5484893536566	-4.67415050227244	1.27585663907233	5.50693297101714e-07	0.000403153384586546	Zp1	22786	zona pellucida glycoprotein 1	protein-coding
ENSMUSG00000019997	196.232462254548	2.24755385954246	0.611223620069381	6.17805277810186e-07	0.000429342513787471	Ccn2	14219	cellular communication network factor 2	protein-coding
ENSMUSG00000051747	93.0458937231063	6.47496216900666	1.97684229469073	6.3533895039694e-07	0.000429342513787471	Ttn	22138	titin	protein-coding
ENSMUSG00000021070	160.945473689336	-1.96422443670889	0.543662246280992	8.44582806260168e-07	0.000518016289176761	Bdkrb2	12062	bradykinin receptor, beta 2	protein-coding
ENSMUSG00000035367	1022.26649833182	0.647045912604266	0.153690805324071	8.55006965630396e-07	0.000518016289176761	Rmi1	74386	RecQ mediated genome instability 1	protein-coding
ENSMUSG00000021224	469.13364525371	1.16303652207705	0.358916545263014	1.32689032881102e-06	0.000777115435906988	Numb	18222	NUMB endocytic adaptor protein	protein-coding
ENSMUSG00000030123	343.85744657475	-3.95659070899699	1.25501907625562	1.71360058297799e-06	0.000971224588481394	Plxnd1	67784	plexin D1	protein-coding
ENSMUSG00000028023	8341.24401883289	-7.41233917216169	2.88702080972429	2.01307305525091e-06	0.0011053029243987	Pitx2	18741	paired-like homeodomain transcription factor 2	protein-coding
ENSMUSG00000048440	228.153454094371	1.9286204764766	0.593107891962735	2.13989153085074e-06	0.00113933012718326	Cyp4f16	70101	cytochrome P450, family 4, subfamily f, polypeptide 16	protein-coding
ENSMUSG00000029608	1738.82809081841	-1.56701844099028	0.488524211671793	2.32909850616193e-06	0.0012035959045078	Rph3a	19894	rabphilin 3A	protein-coding
ENSMUSG00000020524	4570.56459301273	-1.86200996703402	0.58687603912677	2.64258052217666e-06	0.00131417638074909	Gria1	14799	glutamate receptor, ionotropic, AMPA1 (alpha 1)	protein-coding
ENSMUSG00000039167	838.30372019464	1.53489033486406	0.487626460412593	2.69267784331059e-06	0.00131417638074909	Adgrl4	170757	adhesion G protein-coupled receptor L4	protein-coding
ENSMUSG00000044338	739.27320411006	1.59906801932255	0.515763781545267	3.16105990641258e-06	0.00150107628528835	Aplnr	23796	apelin receptor	protein-coding
ENSMUSG00000000805	1013.62113988462	1.4682430380193	0.491038504044056	4.00320514699184e-06	0.00185095564296438	Car4	12351	carbonic anhydrase 4	protein-coding
ENSMUSG00000037362	8678.97481748813	-5.0368234161815	2.12658081962887	4.1988633985684e-06	0.0018916417926371	Ccn3	18133	cellular communication network factor 3	protein-coding
ENSMUSG00000069072	1412.79648365638	-1.74302961323649	0.585940975151392	4.34665888376416e-06	0.00190122680449933	Slc7a14	241919	solute carrier family 7 (cationic amino acid transporter, y+ system), member 14	protein-coding
ENSMUSG00000020953	2123.9440202834	1.92018773814898	0.653959609254769	4.43655657282144e-06	0.00190122680449933	Coch	12810	cochlin	protein-coding
ENSMUSG00000027965	3096.41161276465	2.10606131251826	0.739224251067344	4.81816130671418e-06	0.00201559747997543	Olfm3	229759	olfactomedin 3	protein-coding
ENSMUSG00000038764	101.819591570358	3.68148866268074	1.45154318931709	5.26497353549858e-06	0.00215129267485372	Ptpn3	545622	protein tyrosine phosphatase, non-receptor type 3	protein-coding
ENSMUSG00000028036	121.138223067684	2.97079186734819	1.24265980066395	8.14506374464536e-06	0.00325247204530498	Ptgfr	19220	prostaglandin F receptor	protein-coding
ENSMUSG00000094707	26.333197895293	5.54248221631674	3.17484478501178	8.9299725308676e-06	0.00344422214263076	A830019P07Rik	329056	RIKEN cDNA A830019P07 gene	ncRNA
ENSMUSG00000045071	276.289542594726	-0.908311245408697	0.320687478833701	9.01731465913575e-06	0.00344422214263076	E130308A19Rik	230259	RIKEN cDNA E130308A19 gene	protein-coding
ENSMUSG00000025193	183.7194817952	1.08390839319338	0.409472678416255	1.05970449848961e-05	0.00396149107201329	Cutc	66388	cutC copper transporter	protein-coding
ENSMUSG00000032218	169.172109614013	1.30873786919591	0.506804534854302	1.18034182274619e-05	0.00431534022946668	Ccnb2	12442	cyclin B2	protein-coding
ENSMUSG00000044505	74.6802299795398	4.50579465850916	2.59142718664231	1.20348133889509e-05	0.00431534022946668	Lingo4	320747	leucine rich repeat and Ig domain containing 4	protein-coding
ENSMUSG00000059923	1525.92972818246	-0.554989861431003	0.152017692823119	1.40374753405034e-05	0.00492482225577201	Grb2	14784	growth factor receptor bound protein 2	protein-coding
ENSMUSG00000083307	124.623022359591	-1.63737130704592	0.667432017977975	1.45462566672382e-05	0.00492482225577201	AA414768	245350	expressed sequence AA414768	protein-coding
ENSMUSG00000036545	118.873204014971	-1.92981217108885	0.823821785551733	1.48360029444793e-05	0.00492482225577201	Adamts2	216725	a disintegrin-like and metallopeptidase (reprolysin type) with thrombospondin type 1 motif, 2	protein-coding
ENSMUSG00000028978	444.09797035645	0.876641559030603	0.322541088436215	1.49412423657853e-05	0.00492482225577201	Nos3	18127	nitric oxide synthase 3, endothelial cell	protein-coding
ENSMUSG00000067604	17.646717425094	4.44049317114397	2.80155880306691	1.51360501884854e-05	0.00492482225577201	Nms	433292	neuromedin S	protein-coding
ENSMUSG00000110444	286.268513703978	1.88672931869709	0.811092435681994	1.58016102711208e-05	0.00504789622661078	Gm10033	378466	predicted gene 10033	protein-coding
ENSMUSG00000011171	158.608495085965	2.21418888374862	1.02394163493955	1.70315639046455e-05	0.00534365317508252	Vipr2	22355	vasoactive intestinal peptide receptor 2	protein-coding
ENSMUSG00000028992	334.957771506685	0.863710670718896	0.323055133958861	1.81740470035175e-05	0.00552790009609557	Nmnat1	66454	nicotinamide nucleotide adenylyltransferase 1	protein-coding
ENSMUSG00000033721	213.081617280329	2.27320981384823	1.08036735824099	1.82480481259842e-05	0.00552790009609557	Vav3	57257	vav 3 oncogene	protein-coding
ENSMUSG00000026622	67.7916844170294	2.56624223931906	1.2971655158527	1.95102873478808e-05	0.00575671331616497	Nek2	18005	NIMA (never in mitosis gene a)-related expressed kinase 2	protein-coding
ENSMUSG00000035372	1510.1454739002	0.62667347881007	0.187562638853785	1.96586681257768e-05	0.00575671331616497	1810055G02Rik	72056	RIKEN cDNA 1810055G02 gene	protein-coding
ENSMUSG00000005374	804.578288658278	0.824368163299797	0.305101478245662	2.08174703896205e-05	0.00599611401222349	Tbl2	27368	transducin (beta)-like 2	protein-coding
ENSMUSG00000028370	255.633167041044	3.07260317213996	1.72647925502189	2.14957414325113e-05	0.00609161575756811	Pappa	18491	pregnancy-associated plasma protein A	protein-coding
ENSMUSG00000029211	1602.53481100118	1.45320628902359	0.633236731833239	2.28950655445213e-05	0.00638517939074982	Gabra4	14397	gamma-aminobutyric acid (GABA) A receptor, subunit alpha 4	protein-coding
ENSMUSG00000038580	84.5275190285489	-1.65697102965708	0.755008796041484	2.43901648538692e-05	0.00669586244503877	Sct	20287	secretin	protein-coding
ENSMUSG00000047554	2508.04267638751	0.626324235383527	0.192538675340433	2.51638972455287e-05	0.00680199499390674	Tmem41b	233724	transmembrane protein 41B	protein-coding
ENSMUSG00000046410	95.1825305737902	-2.41285369051527	1.30166817660106	2.61186627228115e-05	0.0069531046066636	Kcnk6	52150	potassium inwardly-rectifying channel, subfamily K, member 6	protein-coding
ENSMUSG00000019865	1029.25217189187	-3.33912329616593	2.20257720052103	2.72199572074112e-05	0.00713812907663008	Nmbr	18101	neuromedin B receptor	protein-coding
ENSMUSG00000026638	292.947773205702	-3.79425743767933	2.8972840875177	2.7944286454154e-05	0.00714714183543481	Irf6	54139	interferon regulatory factor 6	protein-coding
ENSMUSG00000061859	1595.6212871137	1.40841711035905	0.635245560988767	2.80678876861128e-05	0.00714714183543481	Patj	12695	PATJ, crumbs cell polarity complex component	protein-coding
ENSMUSG00000055407	5871.79183368642	-0.556386744242714	0.163978329936997	3.04252744227512e-05	0.00763674388011055	Map6	17760	microtubule-associated protein 6	protein-coding
ENSMUSG00000073542	79.2374282322662	1.39625097495592	0.643741534644081	3.15357124828052e-05	0.00780397842708292	Cep76	225659	centrosomal protein 76	protein-coding
ENSMUSG00000025993	1331.19476657757	0.949051648977736	0.403892371200797	3.32251107538783e-05	0.00809977072508091	Slc40a1	53945	solute carrier family 40 (iron-regulated transporter), member 1	protein-coding
ENSMUSG00000024810	1601.56592671326	1.10435425066461	0.492830631479695	3.36530030125729e-05	0.00809977072508091	Il33	77125	interleukin 33	protein-coding
ENSMUSG00000036529	1506.74257214487	-0.609628692185926	0.1922731853834	3.64438637334574e-05	0.00853758247729129	Sbf1	77980	SET binding factor 1	protein-coding
ENSMUSG00000032434	1221.2802796848	0.727636365715949	0.26869560712525	4.03726771470588e-05	0.00933352549307662	Cmtm6	67213	CKLF-like MARVEL transmembrane domain containing 6	protein-coding
ENSMUSG00000036357	319.474264094429	-1.80184911094516	0.984260910206242	4.2061216886983e-05	0.00959760494421157	Gpr101	245424	G protein-coupled receptor 101	protein-coding
ENSMUSG00000045036	95.7606505133584	3.07728520989255	2.43215451561014	4.26980141064937e-05	0.00961800138270634	Tmem232	381107	transmembrane protein 232	protein-coding
ENSMUSG00000026605	166.656014927844	1.61609192509429	0.845579411207491	4.35175777890316e-05	0.00967852964244664	Cenpf	108000	centromere protein F	protein-coding
ENSMUSG00000005397	1223.29812130579	0.969771230961802	0.436796639649531	4.47991709016679e-05	0.00983901790927881	Nid1	18073	nidogen 1	protein-coding
ENSMUSG00000030235	2477.01129912352	0.796017809419343	0.321996564238646	4.5416382295082e-05	0.00985143008548878	Slco1c1	58807	solute carrier organic anion transporter family, member 1c1	protein-coding
ENSMUSG00000030792	1199.84225631097	-1.76210489281469	0.991315809108785	4.7893449850816e-05	0.0102620477302297	Dkkl1	50722	dickkopf-like 1	protein-coding
ENSMUSG00000026640	1693.2835560181	-0.836142398518703	0.355572498225191	5.0001218941278e-05	0.0105845953831115	Plxna2	18845	plexin A2	protein-coding
ENSMUSG00000034758	156.1087743773	-1.54657069678544	0.843867244892482	5.40371189476357e-05	0.0112920992978679	Tle6	114606	transducin-like enhancer of split 6	protein-coding
ENSMUSG00000028385	1115.51588025335	-0.689062555928265	0.254064039122475	5.47294798422591e-05	0.0112920992978679	Snx30	209131	sorting nexin family member 30	protein-coding
ENSMUSG00000063297	4435.40316257763	1.07151256126447	0.518564470671935	5.5271516199012e-05	0.0112920992978679	Luzp2	233271	leucine zipper protein 2	protein-coding
ENSMUSG00000036902	2442.71919219305	-1.51675019221546	0.841889899255153	5.91035271169247e-05	0.0118549804989345	Neto2	74513	neuropilin (NRP) and tolloid (TLL)-like 2	protein-coding
ENSMUSG00000044364	408.177731882254	-0.707867455503654	0.271098811874097	5.93761117761089e-05	0.0118549804989345	Tmem74b	108832	transmembrane protein 74B	protein-coding
ENSMUSG00000023909	3205.80824953113	0.516212671445626	0.161164853076642	6.65152003588443e-05	0.0131311468573584	Paqr4	76498	progestin and adipoQ receptor family member IV	protein-coding
ENSMUSG00000035000	73.6887073440367	2.4607439274058	2.04372370658199	6.88122954804322e-05	0.0133661641728732	Dpp4	13482	dipeptidylpeptidase 4	protein-coding
ENSMUSG00000044988	94.9514602691211	-2.75859669852207	2.79985808747038	6.92271451184668e-05	0.0133661641728732	Ucn3	83428	urocortin 3	protein-coding
ENSMUSG00000001403	410.097809201275	1.01420568786653	0.511231452636766	7.46428898278792e-05	0.0142551692856069	Ube2c	68612	ubiquitin-conjugating enzyme E2C	protein-coding
ENSMUSG00000022906	57.7480148079696	1.98796002093784	1.4526200122968	7.72424249706887e-05	0.0145930043734946	Parp9	80285	poly (ADP-ribose) polymerase family, member 9	protein-coding
ENSMUSG00000032532	1523.87793329893	2.47467832312266	2.32379979653227	7.89618982203669e-05	0.0147133820923222	Cck	12424	cholecystokinin	protein-coding
ENSMUSG00000022091	436.03623345075	0.817893315726264	0.373382933325456	8.06422226330173e-05	0.0147133820923222	Sorbs3	20410	sorbin and SH3 domain containing 3	protein-coding
ENSMUSG00000047586	156.735535652911	-2.14981029477073	1.71495401501031	8.09591030459036e-05	0.0147133820923222	Nccrp1	233038	non-specific cytotoxic cell receptor protein 1 homolog (zebrafish)	protein-coding
ENSMUSG00000055612	170.256249649128	1.31744855389289	0.749988067870164	8.12292579940384e-05	0.0147133820923222	Cdca7	66953	cell division cycle associated 7	protein-coding
ENSMUSG00000028273	1055.52004266147	1.3506059946669	0.793907445341241	8.66771565812834e-05	0.0155399759299301	Pdlim5	56376	PDZ and LIM domain 5	protein-coding
ENSMUSG00000078952	87.1866602502823	-1.79988280000718	1.32739317648118	9.2727328056391e-05	0.0164567591308161	Lncenc1	100039691	long non-coding RNA, embryonic stem cells expressed 1	ncRNA
ENSMUSG00000024659	78.4394873459439	1.84793389709747	1.4153743571112	9.58894217210001e-05	0.0168477713963797	Anxa1	16952	annexin A1	protein-coding
ENSMUSG00000026872	414.196414493816	1.08206898062105	0.600454741818918	0.000101786255300071	0.0177067772833886	Zeb2	24136	zinc finger E-box binding homeobox 2	protein-coding
ENSMUSG00000054364	426.287718685244	-0.629235499555664	0.237944780936959	0.000105285561326796	0.0181359540442334	Rhob	11852	ras homolog family member B	protein-coding
ENSMUSG00000028883	1544.64317082824	-2.18737306752005	2.21888483052866	0.000107021665031085	0.0181961647494267	Sema3a	20346	sema domain, immunoglobulin domain (Ig), short basic domain, secreted, (semaphorin) 3A	protein-coding
ENSMUSG00000032041	156.992227833655	1.13456872428181	0.653754299592368	0.000108550335661709	0.0181961647494267	Tirap	117149	toll-interleukin 1 receptor (TIR) domain-containing adaptor protein	protein-coding
ENSMUSG00000031304	262.188902540199	0.856236965378577	0.428658598221899	0.000108742020414901	0.0181961647494267	Il2rg	16186	interleukin 2 receptor, gamma chain	protein-coding
ENSMUSG00000030340	125.827158490632	-1.2225141874957	0.739583206371402	0.000112947221828491	0.0185907272792966	Scnn1a	20276	sodium channel, nonvoltage-gated 1 alpha	protein-coding
ENSMUSG00000071042	310.799356627917	1.15103138257105	0.67628457310727	0.000113606691913137	0.0185907272792966	Rasgrp3	240168	RAS, guanyl releasing protein 3	protein-coding
ENSMUSG00000034282	358.046648400262	-1.33870855453029	0.859183074142876	0.000114274248501083	0.0185907272792966	Evpl	14027	envoplakin	protein-coding
ENSMUSG00000046500	377.217681057643	1.86790543368091	1.61359772796162	0.000116895883383044	0.0186680642820631	Tafa4	320701	TAFA chemokine like family member 4	protein-coding
ENSMUSG00000028312	415.868761612256	0.922506376570893	0.491002651297404	0.000117364350939205	0.0186680642820631	Smc2	14211	structural maintenance of chromosomes 2	protein-coding
ENSMUSG00000071379	5462.38070402381	-1.14786296649318	0.680753159054354	0.000117937116409163	0.0186680642820631	Hpcal1	53602	hippocalcin-like 1	protein-coding
ENSMUSG00000035566	5192.21450929135	-0.789786459087535	0.381342204177858	0.000120408421126364	0.0188890710641984	Pcdh17	219228	protocadherin 17	protein-coding
ENSMUSG00000026094	151.140869098632	1.52565740027174	1.12954388856575	0.000125338953378458	0.0194885434589336	Stk17b	98267	serine/threonine kinase 17b (apoptosis-inducing)	protein-coding
ENSMUSG00000022421	1227.24827357195	-0.964974142820561	0.538543558365642	0.00012946448657611	0.0199534300801952	Nptxr	73340	neuronal pentraxin receptor	protein-coding
ENSMUSG00000020496	5821.74502157837	-0.557900135171628	0.199278657938367	0.000135566817249923	0.02071225199201	Rnf187	108660	ring finger protein 187	protein-coding
ENSMUSG00000047182	39.1477095555397	-1.99866094604857	2.33524460674949	0.00013889529872447	0.0208048173260245	Irs3	16369	insulin receptor substrate 3	protein-coding
ENSMUSG00000026577	1114.47896236579	0.593461207511797	0.223537071137152	0.000139000897996723	0.0208048173260245	Blzf1	66352	basic leucine zipper nuclear factor 1	protein-coding
ENSMUSG00000056515	4308.57709127584	0.668178629547912	0.28402425153587	0.000139725011068349	0.0208048173260245	Rab31	106572	RAB31, member RAS oncogene family	protein-coding
ENSMUSG00000031669	193.019069709412	0.993332627085331	0.576195725021663	0.000141855849102253	0.020944598896862	Gins3	78833	GINS complex subunit 3 (Psf3 homolog)	protein-coding
ENSMUSG00000090035	174.852917848296	1.10561942525973	0.68347293696717	0.000144967406835638	0.0211187996395658	Galnt4	14426	polypeptide N-acetylgalactosaminyltransferase 4	protein-coding
ENSMUSG00000037820	85.7421702536946	1.30423530122219	0.901983521029245	0.000145439656026605	0.0211187996395658	Tgm2	21817	transglutaminase 2, C polypeptide	protein-coding
ENSMUSG00000008398	237.12065396174	0.938208832919315	0.535363018602482	0.00015017002067274	0.0216269447804921	Elk3	13713	ELK3, member of ETS oncogene family	protein-coding
ENSMUSG00000072115	14.4968879304716	1.92735063407749	2.42438594560818	0.000153038659597415	0.0217983858675017	Ang	11727	angiogenin, ribonuclease, RNase A family, 5	protein-coding
ENSMUSG00000021279	122.567197474516	-1.02356984435334	0.617027614183203	0.000153841767078555	0.0217983858675017	Cdc42bpb	217866	CDC42 binding protein kinase beta	protein-coding
ENSMUSG00000079017	214.50103966518	-1.49376557522007	1.2184929525068	0.000157039855751714	0.022073522124461	Ifi27l2a	76933	interferon, alpha-inducible protein 27 like 2A	protein-coding
ENSMUSG00000027963	4509.75995714669	0.567437457254321	0.211703364924311	0.000162750754793045	0.0226946885850301	Extl2	58193	exostosin-like glycosyltransferase 2	protein-coding
ENSMUSG00000028298	51.1805022930146	-2.03093216189794	3.32203853866443	0.000164145888459018	0.0227090020490153	Cga	12640	glycoprotein hormones, alpha subunit	protein-coding
ENSMUSG00000085862	17.6687965501163	1.78808455710284	1.97882358069091	0.000167659374007808	0.0230138687602906	Gm13483	100502624	predicted gene 13483	ncRNA
ENSMUSG00000035773	240.027998846482	-1.04886863212827	0.661831384771576	0.000170978446926587	0.0231124900920079	Kiss1r	114229	KISS1 receptor	protein-coding
ENSMUSG00000020000	100.573760340547	1.40645873571917	1.12884798715076	0.000171008748546444	0.0231124900920079	Moxd1	59012	monooxygenase, DBH-like 1	protein-coding
ENSMUSG00000055633	757.527691552996	-0.665477137864163	0.296632863541261	0.000176224470108849	0.0236356025939884	Zfp580	68992	zinc finger protein 580	protein-coding
ENSMUSG00000030838	54.0717093018374	-1.36878468317082	1.09210727177492	0.000178332935380233	0.0237371945047779	Ush1c	72088	USH1 protein network component harmonin	protein-coding
ENSMUSG00000037143	310.00328895372	-1.05859969432236	0.684843018973002	0.000181466835304866	0.0237696631072359	Cfap61	78774	cilia and flagella associated protein 61	protein-coding
ENSMUSG00000021061	1079.22107315425	-0.758001202249111	0.389520238977996	0.000182219368070673	0.0237696631072359	Sptb	20741	spectrin beta, erythrocytic	protein-coding
ENSMUSG00000079396	477.11730586786	0.899674411427322	0.527219032224257	0.000182635430818261	0.0237696631072359	Gm3411	100861615	predicted gene 3411	protein-coding
ENSMUSG00000053062	1741.219747121	0.589026182413942	0.233128625804643	0.000186634955929893	0.0241115895271193	Jam2	67374	junction adhesion molecule 2	protein-coding
ENSMUSG00000037405	148.709203677916	1.04164554246134	0.680139387314359	0.000192544476452174	0.0246934777464576	Icam1	15894	intercellular adhesion molecule 1	protein-coding
ENSMUSG00000038295	266.421343134217	-0.97214203622605	0.612110000741194	0.000197503529939529	0.0249744909794336	Atg9b	213948	autophagy related 9B	protein-coding
ENSMUSG00000042271	1420.72681151272	0.62896182232849	0.270175548695038	0.000197578500064956	0.0249744909794336	Nxt2	237082	nuclear transport factor 2-like export factor 2	protein-coding
ENSMUSG00000041255	22.4410700149463	-1.69254464804098	2.92697331481668	0.000214786133550511	0.0269556597605891	Tmco5b	75275	transmembrane and coiled-coil domains 5B	protein-coding
ENSMUSG00000006395	281.695910178808	-0.877899477153655	0.531837625328211	0.000217728289807298	0.0271311067511647	Hyi	68180	hydroxypyruvate isomerase (putative)	protein-coding
ENSMUSG00000022505	2182.67144904612	0.665650301517468	0.314786443443981	0.0002239599503294	0.0275544631645224	Emp2	13731	epithelial membrane protein 2	protein-coding
ENSMUSG00000036478	555.29529055283	-0.73460849116629	0.386836049456572	0.000224262278459118	0.0275544631645224	Btg1	12226	BTG anti-proliferation factor 1	protein-coding
ENSMUSG00000050132	1075.69931158492	-0.586216035091663	0.241261857652873	0.000229827792489289	0.0278686054173992	Sarm1	237868	sterile alpha and HEAT/Armadillo motif containing 1	protein-coding
ENSMUSG00000038172	404.959307838494	0.927467232790543	0.593624024095828	0.000229991336683146	0.0278686054173992	Ttc39b	69863	tetratricopeptide repeat domain 39B	protein-coding
ENSMUSG00000028841	26.4637980766876	-1.57306174286048	2.57013678479731	0.000233883363562484	0.0280868737416371	Cnksr1	194231	connector enhancer of kinase suppressor of Ras 1	protein-coding
ENSMUSG00000029798	106.515831214946	1.1515372938954	0.884342152915413	0.000234989780308518	0.0280868737416371	Herc6	67138	hect domain and RLD 6	protein-coding
ENSMUSG00000042379	235.930302186024	-1.55309726254445	2.30784419169466	0.000237600559691132	0.0282070394173864	Esm1	71690	endothelial cell-specific molecule 1	protein-coding
ENSMUSG00000113429	195.471119055502	1.174069068388	0.932376557579891	0.000240854809203312	0.0282773531803205	Gm20063	100504101	predicted gene, 20063	ncRNA
ENSMUSG00000031073	89.7027781356607	-1.30993328492341	1.20906047386456	0.000244841181393951	0.0282773531803205	Fgf15	14170	fibroblast growth factor 15	protein-coding
ENSMUSG00000061535	31.2366876620695	1.58981858378866	2.96145108553748	0.00024573677297388	0.0282773531803205	C1qtnf7	109323	C1q and tumor necrosis factor related protein 7	protein-coding
ENSMUSG00000029603	1018.76853420177	-0.609560459525596	0.266069954412721	0.000246023815673266	0.0282773531803205	Dtx1	14357	deltex 1, E3 ubiquitin ligase	protein-coding
ENSMUSG00000027270	763.23603397683	-1.45020722475544	1.59112688843493	0.000246239899635119	0.0282773531803205	Lamp5	76161	lysosomal-associated membrane protein family, member 5	protein-coding
ENSMUSG00000095295	807.336501524366	1.19862251727408	1.01222861846309	0.00025664237504983	0.0292805618806852	Gm3488	100041735	predicted gene, 3488	protein-coding
ENSMUSG00000049349	82.702022829931	-1.47789371418562	2.23882492837618	0.000261475305803412	0.0296394911159093	Gm5105	329763	predicted gene 5105	ncRNA
ENSMUSG00000049130	21.7626359625476	1.46810292418849	2.60142603169011	0.000267066240150985	0.0299588848821071	C5ar1	12273	complement component 5a receptor 1	protein-coding
ENSMUSG00000022048	6161.23383121167	-0.558820442557538	0.227108300137115	0.000269911882247955	0.0299588848821071	Dpysl2	12934	dihydropyrimidinase-like 2	protein-coding
ENSMUSG00000030965	1443.66514190104	0.516314454454334	0.197171673383126	0.000270224954942935	0.0299588848821071	Abraxas2	109359	BRISC complex subunit	protein-coding
ENSMUSG00000053093	697.597754093161	-1.06262211063537	0.829437480364564	0.000286968311167618	0.0312221849641469	Myh7	140781	myosin, heavy polypeptide 7, cardiac muscle, beta	protein-coding
ENSMUSG00000030560	577.352224115082	0.637658142178754	0.306228564680184	0.000287876719646659	0.0312221849641469	Ctsc	13032	cathepsin C	protein-coding
ENSMUSG00000035237	201.29735135873	0.947668436736813	0.678700635561133	0.000301448491792904	0.0322954268341545	Lcat	16816	lecithin cholesterol acyltransferase	protein-coding
ENSMUSG00000030270	983.14898252411	1.28901150411046	1.45561352616244	0.000314756776091542	0.0335168276116872	Cpne9	211232	copine family member IX	protein-coding
ENSMUSG00000067879	2399.61760686439	0.717140542812522	0.412487107096634	0.000329968544032312	0.0348746231905722	Vxn	76982	vexin	protein-coding
ENSMUSG00000059327	378.174366829094	-0.979109966290577	0.753194873747707	0.000331477636472713	0.0348746231905722	Eda	13607	ectodysplasin-A	protein-coding
ENSMUSG00000029154	98.3880289564857	-0.837771073346078	0.565961681425769	0.000341379193861572	0.0357025740246894	Cwh43	231293	cell wall biogenesis 43 C-terminal homolog	protein-coding
ENSMUSG00000039735	1908.9926997074	-0.75138954277713	0.469922997363399	0.000366535018572593	0.0378455116509756	Fnbp1l	214459	formin binding protein 1-like	protein-coding
ENSMUSG00000031799	2258.04268492972	0.621044847904421	0.309323326492345	0.00036715716775476	0.0378455116509756	Tpm4	326618	tropomyosin 4	protein-coding
ENSMUSG00000040935	15.0085628239901	-1.23152332830907	2.06078125601331	0.000368331388293502	0.0378455116509756	Padi6	242726	peptidyl arginine deiminase, type VI	protein-coding
ENSMUSG00000079429	39.3224710936213	1.19976182943969	1.56819623383941	0.000394095046535649	0.0401705397563899	Mroh2a	100040766	maestro heat-like repeat family member 2A	protein-coding
ENSMUSG00000041975	421.403815337109	0.732273115111855	0.457687630017008	0.000395532349337248	0.0401705397563899	Mettl8	228019	methyltransferase like 8	protein-coding
ENSMUSG00000030499	236.834912273998	0.91031335366771	0.714774441692578	0.000405579946266335	0.0409542508959742	Kctd15	233107	potassium channel tetramerisation domain containing 15	protein-coding
ENSMUSG00000029869	1899.81788905237	-0.572411726931434	0.266825345106368	0.000422420785744686	0.0424110468887665	Ephb6	13848	Eph receptor B6	protein-coding
ENSMUSG00000032902	4126.80790417952	0.678277852103123	0.398017724564693	0.000425937743310322	0.0425211713066043	Slc16a1	20501	solute carrier family 16 (monocarboxylic acid transporters), member 1	protein-coding
ENSMUSG00000037940	438.667738225447	0.806687415527199	0.580029979985085	0.00044041448853051	0.0437179805846387	Inpp4b	234515	inositol polyphosphate-4-phosphatase, type II	protein-coding
ENSMUSG00000049630	907.898823892978	-1.13567536018574	1.56983045610868	0.000446115067585511	0.0440350659408844	C1ql3	227580	C1q-like 3	protein-coding
ENSMUSG00000006344	46.2582880970259	1.02003077420072	1.01628234124929	0.000449231393958995	0.0440949474405561	Ggt5	23887	gamma-glutamyltransferase 5	protein-coding
ENSMUSG00000079388	340.978888388472	1.04215683852314	1.11410046811032	0.000458695629318176	0.0445398453531568	2610042L04Rik	554327	RIKEN cDNA 2610042L04 gene	protein-coding
ENSMUSG00000029122	78.8823064603501	0.988660996220486	0.943721305220431	0.000458833921964791	0.0445398453531568	Evc	59056	EvC ciliary complex subunit 1	protein-coding
ENSMUSG00000001918	185.720972902726	-0.980091754250344	0.928364460723159	0.000463511837818465	0.0445791372154491	Slc1a5	20514	solute carrier family 1 (neutral amino acid transporter), member 5	protein-coding
ENSMUSG00000020154	216.51409784018	0.885287674850801	0.722321670697574	0.000465220486149271	0.0445791372154491	Ptprb	19263	protein tyrosine phosphatase, receptor type, B	protein-coding
ENSMUSG00000045092	2091.20474384961	0.606689237790321	0.315815369488592	0.000466850384043405	0.0445791372154491	S1pr1	13609	sphingosine-1-phosphate receptor 1	protein-coding
ENSMUSG00000057729	361.122720397001	-0.879283562575608	0.715629849125079	0.000470254590621046	0.044661476525469	Prtn3	19152	proteinase 3	protein-coding
ENSMUSG00000034574	1391.79272122387	-0.59250759238959	0.300381450067073	0.000477237250886015	0.0449413082099732	Daam1	208846	dishevelled associated activator of morphogenesis 1	protein-coding
ENSMUSG00000024477	728.353116719643	0.611084666213161	0.324054407629694	0.000478316712308764	0.0449413082099732	Pggt1b	225467	protein geranylgeranyltransferase type I, beta subunit	protein-coding
ENSMUSG00000048027	3645.61885140325	-0.88415950088322	0.739085660955981	0.000487298018680132	0.0453944013645661	Rgmb	68799	repulsive guidance molecule family member B	protein-coding
ENSMUSG00000039716	1152.6675852789	-0.543361711954262	0.248176077713704	0.00049341297049326	0.0453944013645661	Dock3	208869	dedicator of cyto-kinesis 3	protein-coding
ENSMUSG00000059203	338.739651548625	0.928771850317244	0.843888270641261	0.000495752088670398	0.0453944013645661	Il1rapl2	60367	interleukin 1 receptor accessory protein-like 2	protein-coding
ENSMUSG00000020173	582.105211486758	-0.726079083326234	0.489219746888911	0.000496214585534415	0.0453944013645661	Cobl	12808	cordon-bleu WH2 repeat	protein-coding
ENSMUSG00000039031	392.174898761036	0.700563254214495	0.452734883053069	0.00049692672184646	0.0453944013645661	Arhgap18	73910	Rho GTPase activating protein 18	protein-coding
ENSMUSG00000050240	156.164695185662	-0.850180512648698	0.686023184669787	0.00049971491116835	0.0453944013645661	Hic2	58180	hypermethylated in cancer 2	protein-coding
ENSMUSG00000031822	239.195195826821	-0.826807210528293	0.646642599196954	0.000501224465835278	0.0453944013645661	Gse1	382034	genetic suppressor element 1, coiled-coil protein	protein-coding
ENSMUSG00000050229	376.351674976934	0.553011445627719	0.26024254024456	0.00050817753125096	0.0457880985850224	Pigm	67556	phosphatidylinositol glycan anchor biosynthesis, class M	protein-coding
ENSMUSG00000026600	547.732576772779	0.697748148940579	0.453791839072968	0.000511516031585003	0.0458537585456556	Soat1	20652	sterol O-acyltransferase 1	protein-coding
ENSMUSG00000043964	471.180366043354	0.611077968875108	0.336445885439167	0.000532125112520508	0.0474558031657978	Orai3	269999	ORAI calcium release-activated calcium modulator 3	protein-coding
ENSMUSG00000024985	5399.811972372	1.0292221349662	1.7153884756258	0.0005347893583852	0.0474558031657978	Tcf7l2	21416	transcription factor 7 like 2, T cell specific, HMG box	protein-coding
ENSMUSG00000050505	1399.44061432987	-0.913431848872181	0.866669891692092	0.000543676821922107	0.0480020189003589	Pcdh20	219257	protocadherin 20	protein-coding
ENSMUSG00000023571	812.483939453854	-0.713684674934715	0.490192438527953	0.000546904202389919	0.0480455341799544	C1qtnf12	67389	C1q and tumor necrosis factor related 12	protein-coding
ENSMUSG00000050088	902.462570807697	0.551184655708804	0.264721990639502	0.000551835961594894	0.0482376012200114	1600012H06Rik	67912	RIKEN cDNA 1600012H06 gene	protein-coding
ENSMUSG00000025329	29.3763453040033	-0.954930345221168	2.28869055952273	0.000554696165902115	0.0482475823509909	Padi1	18599	peptidyl arginine deiminase, type I	protein-coding
ENSMUSG00000036353	906.336165867637	0.560858816571421	0.277412513630131	0.000562015473183679	0.0486434081962426	P2ry12	70839	purinergic receptor P2Y, G-protein coupled 12	protein-coding
ENSMUSG00000037210	534.994776511401	-0.584279608195109	0.308655485417858	0.000571951972178067	0.0492535659875454	Fam193a	231128	family with sequence homology 193, member A	protein-coding
ENSMUSG00000023074	918.782982180498	0.551478745542338	0.268403944471932	0.000574671657794355	0.0492535659875454	Mospd1	70380	motile sperm domain containing 1	protein-coding
ENSMUSG00000024526	777.863391572138	-0.992702225579619	1.32948019400924	0.000578989247656078	0.0492642561601195	Cidea	12683	cell death-inducing DNA fragmentation factor, alpha subunit-like effector A	protein-coding
ENSMUSG00000079499	121.086609868616	-0.975287426278247	1.20316504265731	0.000580404156240452	0.0492642561601195	6530402F18Rik	76220	RIKEN cDNA 6530402F18 gene	ncRNA

## Sheet: DEGs C57 En1 vs WT
	baseMean	log2FoldChange	lfcSE	pvalue	padj	symbol	entrez	geneID	biotype
ENSMUSG00000037025	48.6522935229636	-22.0155183878726	3.32907711833154	8.36982853227224e-12	8.32086503535845e-08	Foxa2	15376	forkhead box A2	protein-coding
ENSMUSG00000004872	13.7470987429366	19.5248472309265	3.52623906183486	4.41878121502882e-09	2.19646567246045e-05	Pax3	18505	paired box 3	protein-coding
ENSMUSG00000072692	159.803369863644	4.25799962426825	0.798164356256023	1.45101174324576e-08	5.77009329819109e-05	Rpl37rt	100502825	ribosomal protein L37, retrotransposed	protein-coding
ENSMUSG00000018217	1432.9515007618	3.5433954675447	0.743718048137752	4.1105715402952e-08	0.000136217489892816	Pmp22	18858	peripheral myelin protein 22	protein-coding
ENSMUSG00000027678	549.879323172271	-0.687747000528658	0.2093908204507	1.50382476874506e-07	0.000427150683956544	Ncoa3	17979	nuclear receptor coactivator 3	protein-coding
ENSMUSG00000001930	341.028905993446	1.7290057409117	1.0124662516567	1.2042108839979e-06	0.00266036944517002	Vwf	22371	Von Willebrand factor	protein-coding
ENSMUSG00000066361	16.0968241848948	6.48441297981619	3.06754865334747	3.02587995784147e-06	0.00527963915680384	Serpina3c	16625	serine (or cysteine) peptidase inhibitor, clade A, member 3C	protein-coding
ENSMUSG00000055707	1787.28882316559	-0.597728147005494	0.189181329455961	3.18642407492059e-06	0.00527963915680384	Klhl26	234378	kelch-like 26	protein-coding
ENSMUSG00000027544	896.623051734991	-0.532514529992878	0.138695889715197	4.30168545475612e-06	0.00651366656364029	Nfatc2	18019	nuclear factor of activated T cells, cytoplasmic, calcineurin dependent 2	protein-coding
ENSMUSG00000064358	230775.622012415	0.580025160784471	0.174616916549207	4.58639701709823e-06	0.00651366656364029	COX3	17710	cytochrome c oxidase subunit III	protein-coding
ENSMUSG00000030825	21.9782846741332	4.06848917491712	2.22256737970692	5.00353262881938e-06	0.00663234928392104	Hsd17b14	66065	hydroxysteroid (17-beta) dehydrogenase 14	protein-coding
ENSMUSG00000028989	24.7902673019468	-4.48977902949784	2.6800840210051	6.54164033763241e-06	0.00753243314432069	Angptl7	654812	angiopoietin-like 7	protein-coding
ENSMUSG00000031916	1317.83672144181	-0.49630728094901	0.127935304600404	6.81908145640862e-06	0.00753243314432069	Cog8	97484	component of oligomeric golgi complex 8	protein-coding
ENSMUSG00000020923	1569.59642776562	-0.484111484440511	0.124329792866334	7.7149284970276e-06	0.00787495052414157	Ubtf	21429	upstream binding transcription factor, RNA polymerase I	protein-coding
ENSMUSG00000024048	1183.93164676219	0.571305964593841	0.198904543414247	9.00773067133865e-06	0.00787495052414157	Myl12a	67268	myosin, light chain 12A, regulatory, non-sarcomeric	protein-coding
ENSMUSG00000052566	896.422737580695	-0.572320896524912	0.203669924993135	9.03617511106262e-06	0.00787495052414157	Hook2	170833	hook microtubule tethering protein 2	protein-coding
ENSMUSG00000048732	103.199881719312	-1.18877320232223	1.07220753355234	9.10948358171584e-06	0.00787495052414157	Klhl11	217194	kelch-like 11	protein-coding
ENSMUSG00000022090	155.201521176097	2.14071655591332	1.70534709157618	1.04313612876216e-05	0.00864194818674089	Pdlim2	213019	PDZ and LIM domain 2	protein-coding
ENSMUSG00000073876	130.086074067971	1.74074567687515	1.56199062290631	1.36084094523521e-05	0.0108230402056447	Gm13305	100042555	predicted gene 13305	protein-coding
ENSMUSG00000108470	18.2996761689852	-3.91493656876303	3.44480792210385	1.7366453913566e-05	0.0127887853023494	Gm4598	100043706	predicted gene 4598	ncRNA
ENSMUSG00000064354	103890.655192578	0.538867637108491	0.172413434486654	1.98153557595407e-05	0.0138285321656768	COX2	17709	cytochrome c oxidase subunit II	protein-coding
ENSMUSG00000073758	79.5969302771964	-0.828410851980342	0.847560705384549	2.01693624103318e-05	0.0138285321656768	Sh3d21	66938	SH3 domain containing 21	protein-coding
ENSMUSG00000090083	1573.28089115206	-0.472230354889547	0.13084981034597	2.45717213131935e-05	0.0162853178290075	Rnf8	58230	ring finger protein 8	protein-coding
ENSMUSG00000003308	1866.01935473695	-0.512527404187681	0.156136584485509	2.96656137258018e-05	0.0175906513839758	Keap1	50868	kelch-like ECH-associated protein 1	protein-coding
ENSMUSG00000119584	33935.8857508346	0.538012632520332	0.29099631923244	2.9814264061594e-05	0.0175906513839758	Rn18s	19791	18S ribosomal RNA	rRNA
ENSMUSG00000032135	880.485136944093	1.10895222556482	1.27226232474349	3.03229924030546e-05	0.0175906513839758	Mcam	84004	melanoma cell adhesion molecule	protein-coding
ENSMUSG00000030413	446.700137662864	0.536087833076883	0.29002085950616	3.09647839078184e-05	0.0175906513839758	Pglyrp1	21946	peptidoglycan recognition protein 1	protein-coding
ENSMUSG00000016427	5435.89679471225	0.529217343826455	0.186897089279518	3.31433551826024e-05	0.0183052591971023	Ndufa1	54405	NADH:ubiquinone oxidoreductase subunit A1	protein-coding
ENSMUSG00000079588	27.4851703064038	3.29831774265837	3.96899317669301	3.44335824734643e-05	0.0183141983798399	Tmem182	381339	transmembrane protein 182	protein-coding
ENSMUSG00000070527	1996.14179753942	-0.515971750862646	0.164321011769049	3.59228354279412e-05	0.0183141983798399	Mkrn3	22652	makorin, ring finger protein, 3	protein-coding
ENSMUSG00000018974	918.624591508693	-0.507302570424174	0.159969515647921	4.19036045398672e-05	0.0203212041235654	Sart3	53890	squamous cell carcinoma antigen recognized by T cells 3	protein-coding
ENSMUSG00000046480	186.184632633427	1.51819623264626	1.86554270376196	4.4169694313875e-05	0.0204238612102971	Scn4b	399548	sodium channel, type IV, beta	protein-coding
ENSMUSG00000023905	332.177324843528	1.00795599267714	1.29373437066155	4.86065865238648e-05	0.0219646536330455	Tnfrsf12a	27279	tumor necrosis factor receptor superfamily, member 12a	protein-coding
ENSMUSG00000047789	568.582295659812	-0.509622717548971	0.180272333386999	6.02436325876327e-05	0.0266183143719978	Slc38a9	268706	solute carrier family 38, member 9	protein-coding
ENSMUSG00000047959	407.699430549425	-0.502648020683743	0.230719004951653	6.53014730578997e-05	0.0282258519306569	Kcna3	16491	potassium voltage-gated channel, shaker-related subfamily, member 3	protein-coding
ENSMUSG00000090667	46.0963342684565	3.47622460750672	6.66459432118691	6.91691921192118e-05	0.029261511636304	Mdfic2	330390	MyoD family inhibitor domain containing 2	protein-coding
ENSMUSG00000026270	1617.17047011963	-0.43659896922682	0.128111528681158	7.70644374507528e-05	0.0319223377048608	Capn10	23830	calpain 10	protein-coding
ENSMUSG00000028700	1594.98941422314	-0.470489276509952	0.146340169218886	8.02798683311228e-05	0.0325756045311778	Pomgnt1	68273	protein O-linked mannose beta 1,2-N-acetylglucosaminyltransferase	protein-coding
ENSMUSG00000064370	120538.379080215	0.491606079777401	0.167713476699881	9.02891964538177e-05	0.0353460091987496	CYTB	17711	cytochrome b	protein-coding
ENSMUSG00000059325	567.80009505891	0.48563772563963	0.373108467056475	9.06627002532934e-05	0.0353460091987496	Hopx	74318	HOP homeobox	protein-coding
ENSMUSG00000027435	334.918141454665	0.487567044821733	0.222800618035125	9.81642941130973e-05	0.0371511463932055	Cd93	17064	CD93 antigen	protein-coding
ENSMUSG00000030125	81.5838084587041	-1.28921849827445	2.10010094337483	0.000101918129325427	0.0371511463932055	Lrrc23	16977	leucine rich repeat containing 23	protein-coding
ENSMUSG00000028312	415.868761612256	0.477115269820447	0.253523083923361	0.000107406262671794	0.0381349771554158	Smc2	14211	structural maintenance of chromosomes 2	protein-coding
ENSMUSG00000034243	849.314547961404	0.479395044939205	0.236791444356091	0.0001099009155581	0.0383361386673981	Golgb1	224139	golgi autoantigen, golgin subfamily b, macrogolgin 1	protein-coding
ENSMUSG00000020396	2350.17681982531	0.567436135288516	0.765961997772443	0.000114718319478388	0.0386600736642168	Nefh	380684	neurofilament, heavy polypeptide	protein-coding
ENSMUSG00000067594	81.8679553751472	-0.812653410080153	1.31820353166961	0.000118905970183387	0.0394034567526048	Krt77	406220	keratin 77	protein-coding
ENSMUSG00000074695	23.545759794142	1.52316565113496	2.9130418387593	0.000121672715072253	0.0396593212095347	Il22	50929	interleukin 22	protein-coding
ENSMUSG00000009566	292.543001456064	-0.484904737284637	0.200055341732897	0.000125048229933707	0.040102160576966	Fpgs	14287	folylpolyglutamyl synthetase	protein-coding
ENSMUSG00000064351	161977.329716118	0.484162076227289	0.179110709632111	0.000135125321892745	0.0426459805586261	COX1	17708	cytochrome c oxidase subunit I	protein-coding
ENSMUSG00000027198	1564.90433542732	-0.445684335673896	0.142913109365743	0.000156258317125458	0.0484583862627924	Ext2	14043	exostosin glycosyltransferase 2	protein-coding
ENSMUSG00000030269	809.985352341305	-0.479564568284982	0.183746649120272	0.000158416491831288	0.0484583862627924	Mtmr14	97287	myotubularin related protein 14	protein-coding
ENSMUSG00000054312	2124.41860020281	0.469741826721863	0.163143512848855	0.000164264381231208	0.049485889273032	Mrps21	66292	mitochondrial ribosomal protein S21	protein-coding

## Sheet: DEGs WT Swiss vs C57
	baseMean	log2FoldChange	lfcSE	pvalue	padj	symbol	entrez	geneID	biotype
ENSMUSG00000100801	29559.6	10.0678	0.336447	2.50531e-197	2.49065e-193	Gm15459	727711	heat shock protein 8 pseudogene	pseudo
ENSMUSG00000059040	9920.12	7.06548	0.263829	2.91231e-158	1.93018e-154	Eno1b	433182	enolase 1B, retrotransposed	protein-coding
ENSMUSG00000107470	2483.6	10.647	0.403947	9.06531e-154	4.50614e-150	Gm3375	100041503	proteasome subunit beta type 5 precursor (proteasome epsilon chain) (Macropain epsilon chain) (multicatalytic endopeptidase complex epsilon chain) (proteasome subunit X) (proteasome chain 6)	pseudo
ENSMUSG00000084349	2819.18	12.0578	0.56913	1.53581e-100	2.77606e-97	Rpl3-ps1	100043000	ribosomal protein L3, pseudogene 1	pseudo
ENSMUSG00000070713	1070.74	6.90798	0.335086	1.09467e-94	1.81378e-91	Gm10282	100042405	high mobility group nucleosomal binding domain 2 pseudogene	pseudo
ENSMUSG00000069117	703.145	8.50002	0.442213	9.65841e-83	1.47722e-79	Rps18-ps6	100039740	ribosomal protein S18, pseudogene 6	pseudo
ENSMUSG00000096449	364.846	8.61022	0.452284	3.22822e-81	4.58476e-78	LOC118568041	118568041	NADH-ubiquinone oxidoreductase chain 5-like	pseudo
ENSMUSG00000047347	298.054	8.1422	0.463791	2.30341e-69	2.86241e-66	Tdg-ps	545124	thymine DNA glycosylase, pseudogene	protein-coding
ENSMUSG00000080893	1021.92	11.9322	0.738009	1.06544e-59	1.24612e-56	Ndufa12-ps	112590811	NADH:ubiquinone oxidoreductase subunit A12, pseudogene	pseudo
ENSMUSG00000117621	565.681	10.6866	0.699115	1.97378e-53	2.18026e-50	Hspe1-rs1	628438	heat shock protein 1 (chaperonin 10), related sequence 1	pseudo
ENSMUSG00000078139	618.254	10.1706	0.68272	8.50566e-51	8.05324e-48	AK157302	432732	cDNA sequence AK157302	pseudo
ENSMUSG00000113061	549.655	10.3865	0.700582	2.30923e-50	2.08702e-47	Rps18-ps5	100042388	ribosomal protein S18, pseudogene 5	pseudo
ENSMUSG00000068396	737.836	11.2904	0.781763	4.62209e-48	3.9957e-45	Rpl34-ps1	619547	ribosomal protein L34, pseudogene 1	protein-coding
ENSMUSG00000078249	809.879	9.16487	0.640851	7.15574e-47	5.92823e-44	Hmga1b	111241	high mobility group AT-hook 1B	protein-coding
ENSMUSG00000066878	2308.54	15.3877	1.20979	5.31777e-39	3.91605e-36	Gm10184	100043906	karyopherin (importin) alpha 2 pseudogene	pseudo
ENSMUSG00000018362	1911.7	-4.88931	0.385751	4.85646e-37	3.32969e-34	Kpna2	16647	karyopherin (importin) alpha 2	protein-coding
ENSMUSG00000035726	1703.96	3.34687	0.273781	7.22827e-36	4.79066e-33	Supt16	114741	SPT16, facilitates chromatin remodeling subunit	protein-coding
ENSMUSG00000042369	614.335	3.98117	0.324786	2.96627e-35	1.84307e-32	Rbm45	241490	RNA binding motif protein 45	protein-coding
ENSMUSG00000091957	3344.41	5.60656	0.474075	1.84798e-32	1.11344e-29	Rps2-ps10	667279	ribosomal protein S2, pseudogene 10	pseudo
ENSMUSG00000073876	130.086	8.34631	0.711831	3.84102e-32	2.24621e-29	Gm13305	100042555	predicted gene 13305	protein-coding
ENSMUSG00000030532	1597.44	2.67153	0.234358	5.04854e-32	2.868e-29	Hddc3	68695	HD domain containing 3	protein-coding
ENSMUSG00000107383	584.401	7.54309	0.674752	2.49211e-29	1.3392e-26	Gm4366	100043330	eukaryotic translation elongation factor 1 gamma pseudogene	pseudo
ENSMUSG00000048087	421.956	13.0633	1.26293	2.92399e-26	1.45344e-23	Gm4737	11615	predicted gene 4737	protein-coding
ENSMUSG00000069996	120.382	7.76695	0.760221	7.66657e-25	3.54498e-22	Gm41341	105245971	predicted gene, 41341	ncRNA
ENSMUSG00000114133	1300.91	3.18859	0.329777	8.20554e-24	3.70797e-21	Gm20075	100504125	basic transcription factor 3-like 4 pseudogene	pseudo
ENSMUSG00000044533	4447.41	-4.89832	0.510481	4.44974e-22	1.84321e-19	Rps2	16898	ribosomal protein S2	protein-coding
ENSMUSG00000042770	243.433	4.36083	0.474359	1.18372e-20	4.43246e-18	Hebp1	15199	heme binding protein 1	protein-coding
ENSMUSG00000068141	137.45	11.6139	1.27593	1.20381e-20	4.43246e-18	Gm10232	100040029	predicted pseudogene 10232	pseudo
ENSMUSG00000035929	116.543	6.21534	0.684998	6.89367e-20	2.40468e-17	H2-Q4	15015	histocompatibility 2, Q region locus 4	protein-coding
ENSMUSG00000030761	397.821	-4.11637	0.469124	3.34625e-19	1.14713e-16	Myo7a	17921	myosin VIIA	protein-coding
ENSMUSG00000094242	116.082	8.01441	0.906387	4.05669e-19	1.36711e-16	Gm5456	432817	esterase D/formylglutathione hydrolase pseudogene	pseudo
ENSMUSG00000037727	122.245	-22.9761	3.00291	6.32495e-18	2.02837e-15	Avp	11998	arginine vasopressin	protein-coding
ENSMUSG00000026113	2257.37	3.06604	0.377275	7.15047e-18	2.25671e-15	Inpp4a	269180	inositol polyphosphate-4-phosphatase, type I	protein-coding
ENSMUSG00000056608	1748.49	-2.47148	0.309135	2.27444e-17	6.95734e-15	Chd9	109151	chromodomain helicase DNA binding protein 9	protein-coding
ENSMUSG00000101431	115.315	11.1926	1.36391	3.65214e-17	1.08381e-14	Gm7901	666036	3-phosphoglycerate dehydrogenase pseudogene	pseudo
ENSMUSG00000073427	538.125	2.01225	0.251493	6.50189e-17	1.90113e-14	Gm4924	237412	predicted gene 4924	protein-coding
ENSMUSG00000033036	90.7483	10.7832	1.34146	1.71023e-16	4.92818e-14	Gm7879	665989	peptidyl prolyl isomerase H pseudogene	pseudo
ENSMUSG00000084383	2481.81	15.1231	1.97121	2.17163e-16	6.16836e-14	Gm13370	100046290	ribosomal protein L21 pseudogene	pseudo
ENSMUSG00000112693	71.6318	10.5157	1.36579	2.8206e-15	7.57865e-13	Gm5512	433224	required for meiotic nuclear division 1 pseudogene	pseudo
ENSMUSG00000029064	5745.43	1.884	0.257943	1.8871e-14	4.81041e-12	Gnb1	14688	guanine nucleotide binding protein (G protein), beta 1	protein-coding
ENSMUSG00000110126	53.1612	7.68945	1.02815	3.42892e-14	8.63003e-12	Gm9347	668771	3-phosphoglycerate dehydrogenase pseudogene	pseudo
ENSMUSG00000058174	273.938	-3.48194	0.489949	4.37928e-14	1.07498e-11	Gm5148	381438	predicted gene 5148	protein-coding
ENSMUSG00000033808	594.791	3.75722	0.525046	5.82738e-14	1.413e-11	Tmem87a	211499	transmembrane protein 87A	protein-coding
ENSMUSG00000028656	1643.99	1.80335	0.257514	1.87607e-13	4.4407e-11	Cap1	12331	CAP, adenylate cyclase-associated protein 1 (yeast)	protein-coding
ENSMUSG00000078496	96.033	-5.62372	0.775495	2.27633e-13	5.32474e-11	Zfp982	195531	zinc finger protein 982	protein-coding
ENSMUSG00000082815	32.6125	7.16533	1.0044	4.9002e-13	1.13291e-10	Gm5678	435489	carbonyl reductase 1 pseudogene	pseudo
ENSMUSG00000032305	586.732	-2.11395	0.314455	7.00967e-13	1.60199e-10	Fam219b	78323	family with sequence similarity 219, member B	protein-coding
ENSMUSG00000002396	263.861	1.98828	0.296258	1.00379e-12	2.268e-10	Ocel1	77090	occludin/ELL domain containing 1	protein-coding
ENSMUSG00000073643	2351.86	2.33794	0.363292	2.93466e-12	6.48331e-10	Wdfy1	69368	WD repeat and FYVE domain containing 1	protein-coding
ENSMUSG00000042073	139.029	-4.96169	0.728417	3.83407e-12	8.37724e-10	Abhd14b	76491	abhydrolase domain containing 14b	protein-coding
ENSMUSG00000097574	93.8179	-4.17676	0.644459	1.29654e-11	2.74246e-09	C920006O11Rik	320295	RIKEN cDNA C920006O11 gene	ncRNA
ENSMUSG00000100622	51.0753	3.8525	0.611099	2.14562e-11	4.44389e-09	Gm20379	115488195	predicted gene, 20379	protein-coding
ENSMUSG00000020629	1193.16	0.929596	0.156271	2.93181e-11	6.00961e-09	Adi1	104923	acireductone dioxygenase 1	protein-coding
ENSMUSG00000095597	1622.32	9.0148	1.39758	3.61846e-11	7.26725e-09	Rps7-ps3	624124	ribosomal protein S7, pseudogene 3	pseudo
ENSMUSG00000055675	555.256	3.11837	0.524725	5.2493e-11	1.03338e-08	Kbtbd11	74901	kelch repeat and BTB (POZ) domain containing 11	protein-coding
ENSMUSG00000093954	73.4172	-9.05175	1.43194	8.28093e-11	1.61421e-08	Gm16867	100862085	predicted gene, 16867	protein-coding
ENSMUSG00000083623	31.9606	7.20928	1.13389	9.85672e-11	1.90273e-08	Gm7224	637913	F-box protein 34 pseudogene	pseudo
ENSMUSG00000042962	207.388	6.4018	1.01362	1.39763e-10	2.67203e-08	Gm5436	432676	ATP synthase, H+ transporting, mitochondrial F1 complex, O subunit pseudogene	pseudo
ENSMUSG00000075705	148.829	2.32718	0.402227	1.75328e-10	3.25798e-08	Msrb1	27361	methionine sulfoxide reductase B1	protein-coding
ENSMUSG00000094828	141.634	4.89147	0.794881	2.39427e-10	4.4079e-08	Trav3-3	320898	T cell receptor alpha variable 3-3	other
ENSMUSG00000015619	232.636	-18.2236	3.52417	2.72084e-10	4.96315e-08	Gata3	14462	GATA binding protein 3	protein-coding
ENSMUSG00000000384	370.121	1.95469	0.335989	2.94712e-10	5.32705e-08	Tbrg4	21379	transforming growth factor beta regulated gene 4	protein-coding
ENSMUSG00000003039	4351.03	1.05888	0.188684	3.44668e-10	6.11879e-08	Fam32a	67922	family with sequence similarity 32, member A	protein-coding
ENSMUSG00000057657	41.5079	4.89237	0.807706	4.25056e-10	7.34903e-08	Rps18-ps3	100042791	ribosomal protein S18, pseudogene 3	pseudo
ENSMUSG00000082935	34.7561	5.93366	0.970681	4.81113e-10	8.24653e-08	Gm7658	665489	eukaryotic translation initiation factor 3, subunit M pseudogene	pseudo
ENSMUSG00000050211	956.701	2.41989	0.437345	6.55402e-10	1.11379e-07	Pla2g4e	329502	phospholipase A2, group IVE	protein-coding
ENSMUSG00000071178	40.8086	9.24567	1.55293	7.76609e-10	1.29759e-07	Serpina1b	20701	serine (or cysteine) preptidase inhibitor, clade A, member 1B	protein-coding
ENSMUSG00000117438	21.1443	5.19116	0.870264	8.99249e-10	1.47767e-07	Rpsa-ps7	433141	ribosomal protein SA, pseudogene 7	pseudo
ENSMUSG00000039601	3124.11	-1.9675	0.355346	1.39883e-09	2.26121e-07	Rcan2	53901	regulator of calcineurin 2	protein-coding
ENSMUSG00000071470	21.7176	9.38412	1.61926	1.91384e-09	3.04423e-07	Ccnb1ip1	239083	cyclin B1 interacting protein 1	protein-coding
ENSMUSG00000005681	50.2248	-7.8794	1.34542	1.94528e-09	3.06968e-07	Apoa2	11807	apolipoprotein A-II	protein-coding
ENSMUSG00000097245	35.6056	4.67873	0.817747	2.3245e-09	3.61078e-07	Gm5421	432438	aconitase 2, mitochondrial pseudogene	pseudo
ENSMUSG00000097360	48.8208	-4.0846	0.733199	2.34622e-09	3.61627e-07	9430065F17Rik	77857	RIKEN cDNA 9430065F17 gene	ncRNA
ENSMUSG00000012483	622.001	1.68439	0.307709	2.55858e-09	3.91325e-07	Rpa3	68240	replication protein A3	protein-coding
ENSMUSG00000021260	480.274	1.71445	0.313505	2.6121e-09	3.9646e-07	Hhipl1	214305	hedgehog interacting protein-like 1	protein-coding
ENSMUSG00000094125	31.7219	9.93119	1.74061	2.70365e-09	4.07247e-07	Gm13698	668096	CWC22 spliceosome-associated protein homolog pseudogene	pseudo
ENSMUSG00000110275	34.0977	5.24444	0.919407	4.02656e-09	5.97463e-07	Gm5905	546015	ribosomal protein S9 pseudogene	pseudo
ENSMUSG00000047676	1624.13	8.0813	1.41647	4.50198e-09	6.63058e-07	Rpsa-ps10	100040633	ribosomal protein SA, pseudogene 10	pseudo
ENSMUSG00000044068	1124.02	2.32554	0.452058	6.21215e-09	9.08207e-07	Zrsr1	22183	zinc finger (CCCH type), RNA binding motif and serine/arginine rich 1	protein-coding
ENSMUSG00000032346	99.2918	-3.44063	0.680824	1.21503e-08	1.76338e-06	Ooep	67968	oocyte expressed protein	protein-coding
ENSMUSG00000078747	407.384	2.48007	0.504408	1.62886e-08	2.32997e-06	Gm20878	100041579	predicted gene, 20878	protein-coding
ENSMUSG00000095730	38.0075	-7.85847	1.45073	2.29695e-08	3.26216e-06	Vmn2r29	76229	vomeronasal 2, receptor 29	protein-coding
ENSMUSG00000044229	362.869	-1.93124	0.386895	2.33164e-08	3.28794e-06	Nxpe4	244853	neurexophilin and PC-esterase domain family, member 4	protein-coding
ENSMUSG00000027646	513.88	1.27141	0.260271	2.46386e-08	3.40807e-06	Src	20779	Rous sarcoma oncogene	protein-coding
ENSMUSG00000032018	2625.08	-1.5464	0.309413	2.46825e-08	3.40807e-06	Sc5d	235293	sterol-C5-desaturase	protein-coding
ENSMUSG00000095595	3828.03	-1.11291	0.235108	2.92704e-08	4.01367e-06	Fam177a	73385	family with sequence similarity 177, member A	protein-coding
ENSMUSG00000095348	307.382	2.08117	0.429437	3.77251e-08	5.13759e-06	Gm7819	665845	family with sequence similarity 205 pseudogene	pseudo
ENSMUSG00000062353	546.883	11.6794	2.30362	3.83269e-08	5.18404e-06	Gm15772	100034726	ribosomal protein L26 pseudogene	pseudo
ENSMUSG00000078087	228.583	-18.6399	4.56978	4.18868e-08	5.62727e-06	Rps12l1	672959	ribosomal protein S12-like 1	pseudo
ENSMUSG00000095991	22.8085	6.60365	1.24368	4.40325e-08	5.83666e-06	Gm17048	100417765	predicted gene 17048	pseudo
ENSMUSG00000116291	20.2583	6.64988	1.25857	5.01254e-08	6.60028e-06	Gm4383	100043354	high mobility group box 2 pseudogene	pseudo
ENSMUSG00000063952	184.91	2.44265	0.533724	8.22449e-08	1.05502e-05	Brpf3	268936	bromodomain and PHD finger containing, 3	protein-coding
ENSMUSG00000083820	27.6272	6.82134	1.31968	8.69005e-08	1.10054e-05	Ndufs6b	623286	NADH:ubiquinone oxidoreductase subunit S6B	protein-coding
ENSMUSG00000035199	3667.77	1.32044	0.287575	9.53395e-08	1.19977e-05	Arl6ip5	65106	ADP-ribosylation factor-like 6 interacting protein 5	protein-coding
ENSMUSG00000005994	65.0884	-17.8898	4.56001	9.83967e-08	1.22276e-05	Tyrp1	22178	tyrosinase-related protein 1	protein-coding
ENSMUSG00000053835	136.463	-3.31593	0.727132	1.06001e-07	1.30908e-05	H2-T24	15042	histocompatibility 2, T region locus 24	protein-coding
ENSMUSG00000039126	1601.31	2.60922	0.58181	1.10431e-07	1.35537e-05	Prune2	353211	prune homolog 2	protein-coding
ENSMUSG00000068231	50.1919	5.02403	1.00807	1.1764e-07	1.435e-05	Vmn1r43	113847	vomeronasal 1 receptor 43	protein-coding
ENSMUSG00000001630	645.369	-1.22225	0.273302	1.19576e-07	1.44971e-05	Stk38l	232533	serine/threonine kinase 38 like	protein-coding
ENSMUSG00000079012	19.4364	8.51471	1.6886	1.27741e-07	1.53931e-05	Serpina3m	20717	serine (or cysteine) peptidase inhibitor, clade A, member 3M	protein-coding
ENSMUSG00000030423	1498.67	-1.26355	0.283739	1.4317e-07	1.71485e-05	Pop4	66161	processing of precursor 4, ribonuclease P/MRP family, (S. cerevisiae)	protein-coding
ENSMUSG00000070056	458.735	1.26934	0.285578	1.49966e-07	1.7855e-05	Mfhas1	52065	malignant fibrous histiocytoma amplified sequence 1	protein-coding
ENSMUSG00000007908	959.028	-1.59269	0.351192	1.75459e-07	2.06205e-05	Hmgcll1	208982	3-hydroxymethyl-3-methylglutaryl-Coenzyme A lyase-like 1	protein-coding
ENSMUSG00000092444	14.7176	8.24851	1.65612	1.76305e-07	2.06205e-05	Gm18733	100417644	vacuolar protein sorting 52 pseudogene	pseudo
ENSMUSG00000021880	62.2526	-8.43755	1.71474	2.19855e-07	2.55637e-05	Rnase6	78416	ribonuclease, RNase A family, 6	protein-coding
ENSMUSG00000095463	3764.18	-1.20036	0.281282	2.44493e-07	2.82632e-05	Entpd4	67464	ectonucleoside triphosphate diphosphohydrolase 4	protein-coding
ENSMUSG00000090667	46.0963	17.0557	4.57487	2.49578e-07	2.85193e-05	Mdfic2	330390	MyoD family inhibitor domain containing 2	protein-coding
ENSMUSG00000079575	23.3413	8.55896	1.76056	2.73626e-07	3.10886e-05	Rbpj-ps3	19667	recombination signal binding protein for immunoglobulin kappa J region, pseudogene 3	pseudo
ENSMUSG00000039410	302.979	-2.16963	0.508961	3.68242e-07	4.16009e-05	Prdm16	70673	PR domain containing 16	protein-coding
ENSMUSG00000002846	631.658	2.05217	0.479276	3.81879e-07	4.28978e-05	Timmdc1	76916	translocase of inner mitochondrial membrane domain containing 1	protein-coding
ENSMUSG00000110105	261.838	-3.16764	0.75272	3.85615e-07	4.30741e-05	Vmn2r29	76229	vomeronasal 2, receptor 29	protein-coding
ENSMUSG00000027086	539.331	-1.16996	0.286092	4.27216e-07	4.71908e-05	Fastkd1	320720	FAST kinase domains 1	protein-coding
ENSMUSG00000020423	336.798	-2.4505	0.589938	4.39848e-07	4.83176e-05	Btg2	12227	BTG anti-proliferation factor 2	protein-coding
ENSMUSG00000037725	209.648	-1.9564	0.462259	4.88379e-07	5.33541e-05	Ckap2	80986	cytoskeleton associated protein 2	protein-coding
ENSMUSG00000072692	159.803	3.70323	0.871429	5.37667e-07	5.84177e-05	Rpl37rt	100502825	ribosomal protein L37, retrotransposed	protein-coding
ENSMUSG00000026622	67.7917	-4.03129	0.935426	6.06779e-07	6.5214e-05	Nek2	18005	NIMA (never in mitosis gene a)-related expressed kinase 2	protein-coding
ENSMUSG00000092260	576.642	1.53229	0.368279	6.2727e-07	6.70538e-05	Zfp963	620419	zinc finger protein 963	protein-coding
ENSMUSG00000094413	21.4232	-7.30582	1.57812	7.37225e-07	7.83863e-05	Trav15n-1	100126452	T cell receptor alpha variable 15N-1	other
ENSMUSG00000034674	2370.9	-0.941991	0.253198	8.27182e-07	8.74833e-05	Tdg	21665	thymine DNA glycosylase	protein-coding
ENSMUSG00000046637	115.868	-1.57094	0.389539	9.66276e-07	0.000101653	Ttc34	242800	tetratricopeptide repeat domain 34	protein-coding
ENSMUSG00000024459	201.787	3.11694	0.800194	1.09437e-06	0.000114523	H2-M5	240095	histocompatibility 2, M region locus 5	protein-coding
ENSMUSG00000036594	105.977	4.37513	1.03903	1.10986e-06	0.000114935	H2-Aa	14960	histocompatibility 2, class II antigen A, alpha	protein-coding
ENSMUSG00000029361	1255.87	2.21841	0.566242	1.10987e-06	0.000114935	Nos1	18125	nitric oxide synthase 1, neuronal	protein-coding
ENSMUSG00000073402	19.0133	5.98305	1.34471	1.16606e-06	0.000119763	Gm8909	667977	predicted gene 8909	protein-coding
ENSMUSG00000028452	19285.3	-1.01367	0.275892	1.16854e-06	0.000119763	Vcp	269523	valosin containing protein	protein-coding
ENSMUSG00000025017	363.01	-4.00965	0.987567	1.29375e-06	0.000129918	Pik3ap1	83490	phosphoinositide-3-kinase adaptor protein 1	protein-coding
ENSMUSG00000055401	895.738	1.11632	0.302255	1.40031e-06	0.00013958	Fbxo6	50762	F-box protein 6	protein-coding
ENSMUSG00000035842	125.384	-1.55592	0.400336	1.48141e-06	0.000146542	Ddx11	320209	DEAD/H box helicase 11	protein-coding
ENSMUSG00000027965	3096.41	-2.48548	0.667951	1.7352e-06	0.000170201	Olfm3	229759	olfactomedin 3	protein-coding
ENSMUSG00000108702	15.2473	7.16164	1.65059	1.73771e-06	0.000170201	Gm9333	668750	methionine aminopeptidase 2 pseudogene	pseudo
ENSMUSG00000084329	10.9661	5.16123	1.23067	1.81998e-06	0.000177386	Gm6733	627119	signal recognition particle receptor ('docking protein') pseudogene	pseudo
ENSMUSG00000093953	103.786	-4.71942	1.15571	1.96017e-06	0.000190118	Trav3d-3	100043202	T cell receptor alpha variable 3D-3	other
ENSMUSG00000074731	45.0581	5.88336	1.38919	2.03374e-06	0.000195347	Zfp345	545471	zinc finger protein 345	protein-coding
ENSMUSG00000022385	71.0704	-3.3006	0.893753	2.18791e-06	0.000209145	Gtse1	29870	G two S phase expressed protein 1	protein-coding
ENSMUSG00000046711	1313.79	-1.42082	0.390309	2.66186e-06	0.000249649	Hmga1	15361	high mobility group AT-hook 1	protein-coding
ENSMUSG00000043192	32.7319	4.83075	1.22751	2.96979e-06	0.00027397	Gpi-ps	669429	glucose-6-phosphate isomerase, pseudogene	pseudo
ENSMUSG00000023452	7793.94	0.992429	0.296161	3.13621e-06	0.000287361	Pisd	320951	phosphatidylserine decarboxylase	protein-coding
ENSMUSG00000062729	476.47	-1.42278	0.402293	3.51879e-06	0.000320937	Ppox	19044	protoporphyrinogen oxidase	protein-coding
ENSMUSG00000051890	501.283	1.02733	0.310255	3.77721e-06	0.000341374	Klhdc1	271005	kelch domain containing 1	protein-coding
ENSMUSG00000116637	14.7432	5.93175	1.50545	4.03226e-06	0.000362776	Gm8130	666489	ribosomal protein S3 pseudogene	pseudo
ENSMUSG00000019808	109.947	2.23236	0.650361	4.07631e-06	0.000365087	Adat2	66757	adenosine deaminase, tRNA-specific 2	protein-coding
ENSMUSG00000037583	29.5779	-14.0147	5.07886	4.53491e-06	0.000404339	Nr0b2	23957	nuclear receptor subfamily 0, group B, member 2	protein-coding
ENSMUSG00000096255	16218.6	0.956089	0.301338	5.06575e-06	0.000447654	Dynlt1b	21648	dynein light chain Tctex-type 1B	protein-coding
ENSMUSG00000032218	169.172	-1.5138	0.449518	5.68605e-06	0.000498042	Ccnb2	12442	cyclin B2	protein-coding
ENSMUSG00000034845	713.894	1.55175	0.462545	5.93443e-06	0.000517519	Plvap	84094	plasmalemma vesicle associated protein	protein-coding
ENSMUSG00000092253	11.3251	7.91318	2.12326	6.26325e-06	0.000543809	H2-Q3	625285	histocompatibility 2, Q region locus 3	pseudo
ENSMUSG00000081684	515.639	9.27345	2.59779	6.74519e-06	0.000580582	Rps2-ps13	546298	ribosomal protein S2, pseudogene 13	pseudo
ENSMUSG00000048440	228.153	-1.89999	0.580401	6.81121e-06	0.000583738	Cyp4f16	70101	cytochrome P450, family 4, subfamily f, polypeptide 16	protein-coding
ENSMUSG00000044708	1880.36	1.95549	0.604194	7.22002e-06	0.000613486	Kcnj10	16513	potassium inwardly-rectifying channel, subfamily J, member 10	protein-coding
ENSMUSG00000097277	629.162	1.40394	0.436487	7.73701e-06	0.000651843	2900076A07Rik	100504421	RIKEN cDNA 2900076A07 gene	ncRNA
ENSMUSG00000096995	328.069	-1.84694	0.574313	7.87764e-06	0.000660891	2810029C07Rik	100504687	RIKEN cDNA 2810029C07 gene	ncRNA
ENSMUSG00000042293	256.691	1.57344	0.487334	7.9786e-06	0.000666548	Gm5617	434402	predicted gene 5617	protein-coding
ENSMUSG00000094622	128.588	-2.66596	0.86586	8.27215e-06	0.000688181	Gm3055	100040944	predicted gene 3055	protein-coding
ENSMUSG00000112449	2053.26	-0.853157	0.28771	8.30872e-06	0.000688343	Srp54b	665155	signal recognition particle 54B	protein-coding
ENSMUSG00000045410	1079.48	-1.43075	0.473997	1.23735e-05	0.00100417	Akr1e1	56043	aldo-keto reductase family 1, member E1	protein-coding
ENSMUSG00000097304	10.9309	4.8297	1.50681	1.25979e-05	0.00101823	Rpl31-ps15	626367	ribosomal protein L31, pseudogene 15	pseudo
ENSMUSG00000044505	74.6802	-6.11107	1.84742	1.30262e-05	0.00104858	Lingo4	320747	leucine rich repeat and Ig domain containing 4	protein-coding
ENSMUSG00000025575	1754.44	0.899071	0.326868	1.62882e-05	0.00128515	Cant1	76025	calcium activated nucleotidase 1	protein-coding
ENSMUSG00000059751	572.804	7.45271	2.43428	1.88118e-05	0.0014784	Rps3a3	668144	ribosomal protein S3A3	pseudo
ENSMUSG00000022041	18.1675	-6.7203	2.2191	2.04047e-05	0.00159727	Chrna2	110902	cholinergic receptor, nicotinic, alpha polypeptide 2 (neuronal)	protein-coding
ENSMUSG00000032186	13199.8	0.753787	0.285371	2.15397e-05	0.0016795	Tmod2	50876	tropomodulin 2	protein-coding
ENSMUSG00000102644	101.574	-1.40493	0.511891	2.23175e-05	0.00173335	Thap6	381650	THAP domain containing 6	pseudo
ENSMUSG00000112640	268.742	-2.85451	1.12543	2.48625e-05	0.0019235	Gm32687	102635315	predicted gene, 32687	protein-coding
ENSMUSG00000000560	2795.14	1.50214	0.561049	2.56816e-05	0.00197918	Gabra2	14395	gamma-aminobutyric acid (GABA) A receptor, subunit alpha 2	protein-coding
ENSMUSG00000003929	426.418	1.71372	0.656313	2.76995e-05	0.00211015	Zfp81	224694	zinc finger protein 81	protein-coding
ENSMUSG00000032959	16746.5	-0.545037	0.200338	2.87001e-05	0.00217803	Pebp1	23980	phosphatidylethanolamine binding protein 1	protein-coding
ENSMUSG00000026516	931.183	-1.09204	0.423671	2.91064e-05	0.00220047	Nvl	67459	nuclear VCP-like	protein-coding
ENSMUSG00000114547	2023.79	5.08523	1.91548	3.25798e-05	0.00245373	Gm3226	100041240	tubulin, alpha 1B pseudogene	pseudo
ENSMUSG00000020311	1221.42	1.05683	0.419385	3.29226e-05	0.00247019	Erlec1	66753	endoplasmic reticulum lectin 1	protein-coding
ENSMUSG00000008482	9.08555	7.20799	2.73617	3.50125e-05	0.00261712	Rnf151	67504	ring finger protein 151	protein-coding
ENSMUSG00000096574	64.003	-4.02758	1.6288	3.60341e-05	0.00267338	Gm2956	102640268	predicted gene 2956	protein-coding
ENSMUSG00000043091	5195.57	5.21565	2.06948	4.08223e-05	0.00298408	Tuba1c	22146	tubulin, alpha 1C	protein-coding
ENSMUSG00000047702	55.256	2.66219	1.17838	4.14722e-05	0.00300946	Olfr1388	258459	olfactory receptor 1388	protein-coding
ENSMUSG00000073877	1263.63	2.25286	0.998369	4.35121e-05	0.00314601	Gm13306	100039863	predicted gene 13306	protein-coding
ENSMUSG00000072115	14.4969	-5.5337	2.24095	4.53182e-05	0.00325381	Ang	11727	angiogenin, ribonuclease, RNase A family, 5	protein-coding
ENSMUSG00000028370	255.633	-3.71146	1.61284	4.53305e-05	0.00325381	Pappa	18491	pregnancy-associated plasma protein A	protein-coding
ENSMUSG00000038172	404.959	-1.42354	0.595204	4.59073e-05	0.00328336	Ttc39b	69863	tetratricopeptide repeat domain 39B	protein-coding
ENSMUSG00000063524	38119.6	-0.677334	0.281247	4.65388e-05	0.00330475	Eno1	13806	enolase 1, alpha non-neuron	protein-coding
ENSMUSG00000114827	16.8389	3.25387	1.45877	4.68666e-05	0.00331619	Gm46432	108168103	predicted gene, 46432	pseudo
ENSMUSG00000061477	3772.68	-0.930036	0.394229	4.7249e-05	0.00333139	Rps7	20115	ribosomal protein S7	protein-coding
ENSMUSG00000039716	1152.67	0.726517	0.30553	4.7495e-05	0.0033369	Dock3	208869	dedicator of cyto-kinesis 3	protein-coding
ENSMUSG00000006638	380.252	1.43604	0.607626	4.84133e-05	0.00338944	Abhd1	57742	abhydrolase domain containing 1	protein-coding
ENSMUSG00000044881	354.529	1.16104	0.491346	4.90357e-05	0.00342097	Coa4	68185	cytochrome c oxidase assembly factor 4	protein-coding
ENSMUSG00000024165	1761.69	-0.945446	0.403454	4.9289e-05	0.00342662	Jpt2	52009	Jupiter microtubule associated homolog 2	protein-coding
ENSMUSG00000042532	2182.56	0.527629	0.205146	5.01627e-05	0.00347521	Golga7b	71146	golgi autoantigen, golgin subfamily a, 7B	protein-coding
ENSMUSG00000078889	332.824	-1.65522	0.72426	5.19e-05	0.00358308	Gm14288	13999	predicted gene 14288	protein-coding
ENSMUSG00000029211	1602.53	-1.47652	0.639418	5.31912e-05	0.00365952	Gabra4	14397	gamma-aminobutyric acid (GABA) A receptor, subunit alpha 4	protein-coding
ENSMUSG00000028860	57.664	4.13327	1.84356	5.47931e-05	0.00375511	Sytl1	269589	synaptotagmin-like 1	protein-coding
ENSMUSG00000018378	381.696	1.36476	0.591597	5.49583e-05	0.00375511	2210416O15Rik	70393	RIKEN cDNA 2210416O15 gene	ncRNA
ENSMUSG00000101523	46.9283	6.81734	2.95696	5.68603e-05	0.00387176	Csnk2a1-ps3	100039026	casein kinase 2, alpha 1 polypeptide, pseudogene 3	pseudo
ENSMUSG00000052234	53.7104	-4.71158	2.07605	5.73269e-05	0.00389021	Epx	13861	eosinophil peroxidase	protein-coding
ENSMUSG00000070436	818.244	-1.57364	0.710325	6.11649e-05	0.00412252	Serpinh1	12406	serine (or cysteine) peptidase inhibitor, clade H, member 1	protein-coding
ENSMUSG00000037443	507.556	-1.24499	0.568329	7.11248e-05	0.00476153	Cep85	70012	centrosomal protein 85	protein-coding
ENSMUSG00000068099	745.84	1.37863	0.640273	7.42283e-05	0.00495262	1500009C09Rik	76505	RIKEN cDNA 1500009C09 gene	ncRNA
ENSMUSG00000115212	7.26337	6.31825	2.96992	7.56002e-05	0.00502729	Gm8417	667006	predicted gene 8417	pseudo
ENSMUSG00000091697	20.8297	4.72636	2.25133	7.60102e-05	0.0050377	Eif3s6-ps2	16343	eukaryotic translation initiation factor 3, subunit 6, pseudogene 2	pseudo
ENSMUSG00000030739	740.703	1.05311	0.489692	7.8958e-05	0.00521569	Myh14	71960	myosin, heavy polypeptide 14	protein-coding
ENSMUSG00000099354	29.2076	-2.25799	1.1769	8.09051e-05	0.00532661	1700124L16Rik	67934	RIKEN cDNA 1700124L16 gene	ncRNA
ENSMUSG00000019997	196.232	-1.54345	0.74804	8.20807e-05	0.00538617	Ccn2	14219	cellular communication network factor 2	protein-coding
ENSMUSG00000096900	11.5819	6.63535	3.2981	8.71717e-05	0.00566417	Trav9-1	627324	T cell receptor alpha variable 9-1	other
ENSMUSG00000071005	33.5752	3.03664	1.61434	8.76164e-05	0.00566516	Ccl19	24047	chemokine (C-C motif) ligand 19	protein-coding
ENSMUSG00000044783	1348.17	-1.1234	0.534793	8.77568e-05	0.00566516	A730008H23Rik	212427	RIKEN cDNA A730008H23 gene	protein-coding
ENSMUSG00000024942	144.376	1.59399	0.804571	9.29534e-05	0.00597304	Capn1	12333	calpain 1	protein-coding
ENSMUSG00000070583	110.971	1.42815	0.70526	9.31269e-05	0.00597304	Fv1	14349	Friend virus susceptibility 1	protein-coding
ENSMUSG00000036529	1506.74	0.530843	0.226426	9.35641e-05	0.00597535	Sbf1	77980	SET binding factor 1	protein-coding
ENSMUSG00000026675	866.321	-0.735894	0.345984	9.3764e-05	0.00597535	Hsd17b7	15490	hydroxysteroid (17-beta) dehydrogenase 7	protein-coding
ENSMUSG00000033751	1196.23	-0.531525	0.228269	9.73379e-05	0.00618329	Gadd45gip1	102060	growth arrest and DNA-damage-inducible, gamma interacting protein 1	protein-coding
ENSMUSG00000047719	1158.93	0.631509	0.291874	0.000102549	0.00649355	Ubiad1	71707	UbiA prenyltransferase domain containing 1	protein-coding
ENSMUSG00000079685	26.806	-4.39956	2.32319	0.000104481	0.00659493	Ulbp1	77777	UL16 binding protein 1	protein-coding
ENSMUSG00000091402	53.0538	-8.39574	6.21427	0.000105081	0.00661179	Rd3l	217874	retinal degeneration 3-like	protein-coding
ENSMUSG00000037152	5504.03	0.712148	0.341308	0.000107669	0.00675324	Ndufc1	66377	NADH:ubiquinone oxidoreductase subunit C1	protein-coding
ENSMUSG00000027224	141.736	2.7932	1.58681	0.000108273	0.00676977	Duoxa1	213696	dual oxidase maturation factor 1	protein-coding
ENSMUSG00000006154	161.043	-1.69117	0.919658	0.000114161	0.00711556	Eps8l1	67425	EPS8-like 1	protein-coding
ENSMUSG00000003814	15260.5	0.444144	0.176152	0.000115325	0.00716563	Calr	12317	calreticulin	protein-coding
ENSMUSG00000032714	95.3496	-1.48137	0.78432	0.000116928	0.00722795	Syde1	71709	synapse defective 1, Rho GTPase, homolog 1 (C. elegans)	protein-coding
ENSMUSG00000045036	95.7607	-4.21881	2.31848	0.000117055	0.00722795	Tmem232	381107	transmembrane protein 232	protein-coding
ENSMUSG00000090173	16.0895	-5.44144	2.99967	0.000125694	0.00771352	Fbxw10	213980	F-box and WD-40 domain protein 10	protein-coding
ENSMUSG00000092178	44.6083	-4.29696	2.41321	0.00012679	0.00775679	Gm45351	72716	predicted gene 45351	ncRNA
ENSMUSG00000027706	6117.61	0.669953	0.327706	0.000129332	0.00788808	Sec62	69276	SEC62 homolog (S. cerevisiae)	protein-coding
ENSMUSG00000051747	93.0459	-4.42134	2.49443	0.000130169	0.0078936	Ttn	22138	titin	protein-coding
ENSMUSG00000074695	23.5458	5.81411	3.25981	0.000130217	0.0078936	Il22	50929	interleukin 22	protein-coding
ENSMUSG00000018666	717.205	0.554169	0.254955	0.000131376	0.00791561	Cbx1	12412	chromobox 1	protein-coding
ENSMUSG00000040112	1123.32	0.570893	0.267616	0.000136012	0.0081702	Mrps35	232536	mitochondrial ribosomal protein S35	protein-coding
ENSMUSG00000078877	1215.95	-1.09875	0.578569	0.000137157	0.00821416	Gm14295	100039123	predicted gene 14295	protein-coding
ENSMUSG00000014075	815.58	0.531286	0.242131	0.000139444	0.008326	Dynlt2b	66061	dynein light chain Tctex-type 2B	protein-coding
ENSMUSG00000024140	629.245	0.808669	0.416305	0.000141126	0.00840122	Epas1	13819	endothelial PAS domain protein 1	protein-coding
ENSMUSG00000023236	16966.9	0.677669	0.340309	0.00014648	0.00869393	Scg5	20394	secretogranin V	protein-coding
ENSMUSG00000072774	239.63	-1.4561	0.827429	0.000150574	0.0089103	Zfp951	626391	zinc finger protein 951	protein-coding
ENSMUSG00000020475	204.143	1.29595	0.723598	0.000156059	0.00919018	Pgam2	56012	phosphoglycerate mutase 2	protein-coding
ENSMUSG00000063698	813.715	0.936004	0.506907	0.000165056	0.00968086	Sfxn4	94281	sideroflexin 4	protein-coding
ENSMUSG00000097180	82.9126	1.40414	0.819937	0.000169753	0.00990394	2700038G22Rik	67194	RIKEN cDNA 2700038G22 gene	ncRNA
ENSMUSG00000107906	16.4797	4.21231	2.61796	0.000173874	0.0101086	Eif4a3l2	434080	eukaryotic translation initiation factor 4A3 like 2	pseudo
ENSMUSG00000031594	34.0703	-5.17009	3.22858	0.000180517	0.0104642	Fgl1	234199	fibrinogen-like protein 1	protein-coding
ENSMUSG00000090035	174.853	-1.2323	0.716037	0.000185839	0.0107414	Galnt4	14426	polypeptide N-acetylgalactosaminyltransferase 4	protein-coding
ENSMUSG00000024038	5585.35	0.505528	0.237867	0.000192747	0.0110595	Ndufv3	78330	NADH:ubiquinone oxidoreductase core subunit V3	protein-coding
ENSMUSG00000018238	30.8608	-3.91215	2.53463	0.000193012	0.0110595	Gdf9	14566	growth differentiation factor 9	protein-coding
ENSMUSG00000045095	1681.11	1.29451	0.771735	0.000194609	0.011119	Magi1	14924	membrane associated guanylate kinase, WW and PDZ domain containing 1	protein-coding
ENSMUSG00000066057	508.153	-0.784946	0.439767	0.000213368	0.0121211	Gm1976	100038746	predicted gene 1976	ncRNA
ENSMUSG00000060461	49.5777	-1.97875	1.37687	0.000218015	0.0123147	Dppa5a	434423	developmental pluripotency associated 5A	protein-coding
ENSMUSG00000035367	1022.27	-0.401986	0.164693	0.000220151	0.0124002	Rmi1	74386	RecQ mediated genome instability 1	protein-coding
ENSMUSG00000038291	446.203	0.984891	0.585731	0.000234206	0.0130807	Snx25	102141	sorting nexin 25	protein-coding
ENSMUSG00000023764	876.02	0.987541	0.590203	0.00023815	0.0132637	Sfi1	78887	Sfi1 homolog, spindle assembly associated (yeast)	protein-coding
ENSMUSG00000040040	660.779	-0.640731	0.352066	0.000245756	0.0136491	Ift88	21821	intraflagellar transport 88	protein-coding
ENSMUSG00000025089	4688.1	-2.6657	1.96789	0.000255442	0.0141475	Gfra1	14585	glial cell line derived neurotrophic factor family receptor alpha 1	protein-coding
ENSMUSG00000051980	57.5852	-3.44844	2.49807	0.00026142	0.0144383	Casr	12374	calcium-sensing receptor	protein-coding
ENSMUSG00000047789	568.582	-0.588782	0.31829	0.000263493	0.0145126	Slc38a9	268706	solute carrier family 38, member 9	protein-coding
ENSMUSG00000058126	1207.28	4.76069	3.45958	0.000274917	0.0151	Tpm3-rs7	621054	tropomyosin 3, related sequence 7	pseudo
ENSMUSG00000114442	94.2449	1.7952	1.33526	0.000277477	0.0151789	F630042J09Rik	100038627	RIKEN cDNA F630042J09 gene	ncRNA
ENSMUSG00000056116	278.161	-1.11837	0.717419	0.000277882	0.0151789	H2-T22	15039	histocompatibility 2, T region locus 22	protein-coding
ENSMUSG00000079492	43.0897	1.4923	1.05453	0.000278862	0.0151907	Gm11127	100529082	predicted gene 11127	protein-coding
ENSMUSG00000026154	1979.87	0.506788	0.257868	0.000282837	0.0153651	Sdhaf4	68002	succinate dehydrogenase complex assembly factor 4	protein-coding
ENSMUSG00000033417	573.917	-0.709353	0.417082	0.000289516	0.0156506	Cacul1	78832	CDK2 associated, cullin domain 1	protein-coding
ENSMUSG00000050555	171.435	-1.01943	0.647773	0.000289665	0.0156506	Hyls1	76832	HYLS1, centriolar and ciliogenesis associated	protein-coding
ENSMUSG00000071793	1284.97	-0.824274	0.503654	0.000293743	0.0158279	2610005L07Rik	381598	cadherin 11 pseudogene	pseudo
ENSMUSG00000078517	4450.47	-0.532915	0.282033	0.000297185	0.0159097	Emc1	230866	ER membrane protein complex subunit 1	protein-coding
ENSMUSG00000045268	135.557	1.66602	1.24897	0.000297662	0.0159097	Zfp691	195522	zinc finger protein 691	protein-coding
ENSMUSG00000110444	286.269	-1.29535	0.893877	0.000300625	0.016025	Gm10033	378466	predicted gene 10033	protein-coding
ENSMUSG00000060860	1258.21	-0.519287	0.271842	0.000301977	0.0160541	Ube2s	77891	ubiquitin-conjugating enzyme E2S	protein-coding
ENSMUSG00000055202	730.003	-0.975455	0.629081	0.000314947	0.0166545	Zfp811	240063	zinc finger protein 811	protein-coding
ENSMUSG00000066361	16.0968	4.03848	3.08281	0.0003171	0.0167239	Serpina3c	16625	serine (or cysteine) peptidase inhibitor, clade A, member 3C	protein-coding
ENSMUSG00000073542	79.2374	-1.03654	0.681377	0.000319792	0.0167903	Cep76	225659	centrosomal protein 76	protein-coding
ENSMUSG00000006435	1018.96	0.617946	0.355867	0.000320049	0.0167903	Neurl1a	18011	neuralized E3 ubiquitin protein ligase 1A	protein-coding
ENSMUSG00000073437	487.124	0.94157	0.605905	0.000321137	0.0168031	D330041H03Rik	654822	RIKEN cDNA D330041H03 gene	ncRNA
ENSMUSG00000073073	35.1822	-1.7369	1.37073	0.000332644	0.0173595	Gm8098	666427	predicted gene 8098	ncRNA
ENSMUSG00000036898	1244.88	-0.633648	0.375237	0.000345849	0.0180014	Zfp157	72154	zinc finger protein 157	protein-coding
ENSMUSG00000028360	291.438	-1.1983	0.848594	0.000348891	0.0181122	Slc44a5	242259	solute carrier family 44, member 5	protein-coding
ENSMUSG00000030838	54.0717	1.4323	1.09342	0.000354294	0.0183449	Ush1c	72088	USH1 protein network component harmonin	protein-coding
ENSMUSG00000083773	8111.23	3.87291	3.09449	0.00035911	0.0185459	Gm13394	100033452	glyceraldehyde-3-phosphate dehydrogenase pseudogene	pseudo
ENSMUSG00000026553	8562.81	-0.475795	0.247272	0.000375126	0.0192233	Copa	12847	coatomer protein complex subunit alpha	protein-coding
ENSMUSG00000079262	23.3021	-1.69807	1.39748	0.000376949	0.0192383	Slco1a6	28254	solute carrier organic anion transporter family, member 1a6	protein-coding
ENSMUSG00000046500	377.218	-2.02122	1.70229	0.000377355	0.0192383	Tafa4	320701	TAFA chemokine like family member 4	protein-coding
ENSMUSG00000021606	6303.19	0.550333	0.313387	0.000379905	0.0193188	Ndufs6	407785	NADH:ubiquinone oxidoreductase core subunit S6	protein-coding
ENSMUSG00000027236	1207.58	-0.802899	0.522838	0.000381349	0.0193427	Eif3j1	78655	eukaryotic translation initiation factor 3, subunit J1	protein-coding
ENSMUSG00000006021	1404.12	0.547534	0.312086	0.000385636	0.0195105	Kptn	70394	kaptin	protein-coding
ENSMUSG00000018395	8072.28	-0.487648	0.259563	0.000386647	0.0195119	Kif3a	16568	kinesin family member 3A	protein-coding
ENSMUSG00000107157	23.1077	2.686	2.26708	0.000388321	0.0195468	Gm3170	100417763	predicted gene 3170	pseudo
ENSMUSG00000022452	6033.52	0.545639	0.314749	0.000408197	0.0204438	Smdt1	69029	single-pass membrane protein with aspartate rich tail 1	protein-coding
ENSMUSG00000089687	112.035	0.920225	0.638807	0.000420818	0.0210229	Rab42	242681	RAB42, member RAS oncogene family	protein-coding
ENSMUSG00000054169	34.7077	2.43029	2.13498	0.00042949	0.0213768	Ceacam10	26366	carcinoembryonic antigen-related cell adhesion molecule 10	protein-coding
ENSMUSG00000020878	34.9793	-1.69684	1.4676	0.000430053	0.0213768	Lrrc46	69297	leucine rich repeat containing 46	protein-coding
ENSMUSG00000054414	505.212	-0.684711	0.440699	0.000431585	0.0213995	Slc30a7	66500	solute carrier family 30 (zinc transporter), member 7	protein-coding
ENSMUSG00000096910	1266.45	0.661954	0.424286	0.000443706	0.0217021	Zfp955b	100043468	zinc finger protein 955B	protein-coding
ENSMUSG00000025993	1331.19	-0.680468	0.440667	0.000444966	0.0217021	Slc40a1	53945	solute carrier family 40 (iron-regulated transporter), member 1	protein-coding
ENSMUSG00000064356	14436.4	-0.559989	0.337018	0.000458106	0.0222525	ATP8	17706	ATP synthase F0 subunit 8	protein-coding
ENSMUSG00000054435	84.1283	1.23036	0.980484	0.000458861	0.0222525	Gimap4	107526	GTPase, IMAP family member 4	protein-coding
ENSMUSG00000028393	3014.6	0.757728	0.512555	0.000461386	0.0223205	Alad	17025	aminolevulinate, delta-, dehydratase	protein-coding
ENSMUSG00000030452	1412.86	-0.437036	0.223591	0.000463709	0.0223784	Nipa2	93790	non imprinted in Prader-Willi/Angelman syndrome 2 homolog (human)	protein-coding
ENSMUSG00000025188	141.115	-1.05695	0.796059	0.000467794	0.0225209	Hps1	192236	HPS1, biogenesis of lysosomal organelles complex 3 subunit 1	protein-coding
ENSMUSG00000094707	26.3332	-3.46484	3.08824	0.000482146	0.0231558	A830019P07Rik	329056	RIKEN cDNA A830019P07 gene	ncRNA
ENSMUSG00000044320	45.7383	1.11895	0.880498	0.000492719	0.0236066	1700001O22Rik	73598	RIKEN cDNA 1700001O22 gene	protein-coding
ENSMUSG00000051176	13.3248	4.00049	3.63622	0.000500459	0.0239198	Zfp42	22702	zinc finger protein 42	protein-coding
ENSMUSG00000044122	480.534	0.81992	0.584312	0.000508372	0.0242397	Proca1	216974	protein interacting with cyclin A1	protein-coding
ENSMUSG00000072676	6557.78	-0.675884	0.455339	0.00051758	0.0245947	Tmem254a	66039	transmembrane protein 254a	protein-coding
ENSMUSG00000032899	238.195	-1.17181	0.972945	0.000532636	0.0252153	Styk1	243659	serine/threonine/tyrosine kinase 1	protein-coding
ENSMUSG00000021182	348.81	-0.612974	0.401007	0.00053442	0.0252396	Ccdc88c	68339	coiled-coil domain containing 88C	protein-coding
ENSMUSG00000039706	939.699	-0.9659	0.743736	0.000544255	0.0256432	Ldb2	16826	LIM domain binding 2	protein-coding
ENSMUSG00000020121	644.821	0.811258	0.589556	0.000546436	0.0256851	Srgap1	117600	SLIT-ROBO Rho GTPase activating protein 1	protein-coding
ENSMUSG00000035674	4953.99	0.515803	0.311535	0.000554446	0.0260001	Ndufa3	66091	NADH:ubiquinone oxidoreductase subunit A3	protein-coding
ENSMUSG00000026018	1379.56	-0.533277	0.333419	0.000584811	0.0273595	Ica1l	70375	islet cell autoantigen 1-like	protein-coding
ENSMUSG00000021809	285.199	-0.636675	0.435497	0.000591047	0.0275864	Nudt13	67725	nudix (nucleoside diphosphate linked moiety X)-type motif 13	protein-coding
ENSMUSG00000069539	385.921	0.536787	0.340169	0.000605563	0.0281528	Scyl2	213326	SCY1-like 2 (S. cerevisiae)	protein-coding
ENSMUSG00000024260	715.21	0.901193	0.704067	0.000607887	0.0281528	Sap130	269003	Sin3A associated protein	protein-coding
ENSMUSG00000091020	10.2174	2.65826	2.60895	0.000609205	0.0281528	Gm5828	545306	TOX high mobility group box family member 4 pseudogene	pseudo
ENSMUSG00000051316	808.921	-0.61158	0.414991	0.000610042	0.0281528	Taf7	24074	TATA-box binding protein associated factor 7	protein-coding
ENSMUSG00000006289	1129.36	-0.423534	0.225819	0.000610262	0.0281528	Osgep	66246	O-sialoglycoprotein endopeptidase	protein-coding
ENSMUSG00000033721	213.082	-1.23794	1.12253	0.000613119	0.0282191	Vav3	57257	vav 3 oncogene	protein-coding
ENSMUSG00000032059	1054.15	-0.666333	0.472548	0.000627913	0.0288333	Alg9	102580	asparagine-linked glycosylation 9 (alpha 1,2 mannosyltransferase)	protein-coding
ENSMUSG00000097503	55.1716	-1.69946	1.70608	0.000638139	0.0291923	3110045C21Rik	67303	RIKEN cDNA 3110045C21 gene	ncRNA
ENSMUSG00000074916	51.8419	-0.915441	0.733096	0.000638669	0.0291923	Chst14	72136	carbohydrate sulfotransferase 14	protein-coding
ENSMUSG00000033450	209.987	1.79111	1.81207	0.000644593	0.0293955	Tagap	72536	T cell activation Rho GTPase activating protein	protein-coding
ENSMUSG00000025094	9582.64	-2.87442	2.88892	0.000660823	0.0299707	Slc18a2	214084	solute carrier family 18 (vesicular monoamine), member 2	protein-coding
ENSMUSG00000025878	488.832	0.55539	0.367942	0.000661711	0.0299707	Uimc1	20184	ubiquitin interaction motif containing 1	protein-coding
ENSMUSG00000027285	1569.72	-0.560121	0.372786	0.000661728	0.0299707	Haus2	66296	HAUS augmin-like complex, subunit 2	protein-coding
ENSMUSG00000059203	338.74	-1.06483	0.937096	0.000675425	0.0305215	Il1rapl2	60367	interleukin 1 receptor accessory protein-like 2	protein-coding
ENSMUSG00000039304	44.926	0.992558	0.846875	0.000682456	0.0306535	Tnfsf10	22035	tumor necrosis factor (ligand) superfamily, member 10	protein-coding
ENSMUSG00000033577	1191.39	-0.479472	0.29188	0.000682971	0.0306535	Myo6	17920	myosin VI	protein-coding
ENSMUSG00000020142	4708.46	-0.469417	0.283129	0.00069933	0.0312467	Slc1a4	55963	solute carrier family 1 (glutamate/neutral amino acid transporter), member 4	protein-coding
ENSMUSG00000072494	58.7003	-1.56596	1.61564	0.000703867	0.0313789	Ppp1r3e	105651	protein phosphatase 1, regulatory subunit 3E	protein-coding
ENSMUSG00000068117	17.0794	3.41545	3.53079	0.000707886	0.0314875	Mei1	74369	meiotic double-stranded break formation protein 1	protein-coding
ENSMUSG00000033392	8093.82	0.593462	0.415843	0.000712436	0.0316191	Clasp2	76499	CLIP associating protein 2	protein-coding
ENSMUSG00000042249	879.662	-0.771647	0.604206	0.000719849	0.031827	Grk3	320129	G protein-coupled receptor kinase 3	protein-coding
ENSMUSG00000039106	298.85	0.978635	0.848933	0.000720322	0.031827	Htr5a	15563	5-hydroxytryptamine (serotonin) receptor 5A	protein-coding
ENSMUSG00000027678	549.879	-0.456031	0.272037	0.000729094	0.0321432	Ncoa3	17979	nuclear receptor coactivator 3	protein-coding
ENSMUSG00000021872	11.6053	3.7409	4.02295	0.00073885	0.0325012	Rnase10	75019	ribonuclease, RNase A family, 10 (non-active)	protein-coding
ENSMUSG00000104413	51.7179	1.21249	1.1961	0.0007511	0.0329672	Gm37065	105244010	predicted gene, 37065	ncRNA
ENSMUSG00000031590	1634.65	0.348825	0.162635	0.000757379	0.0331695	Frg1	14300	FSHD region gene 1	protein-coding
ENSMUSG00000029836	4430.17	-0.405686	0.224897	0.0008169	0.035561	Cbx3	12417	chromobox 3	protein-coding
ENSMUSG00000074269	153.593	1.10901	1.09184	0.000817351	0.035561	Rec114	73673	REC114 meiotic recombination protein	protein-coding
ENSMUSG00000020490	13.4434	3.2912	3.61641	0.000823299	0.0356638	Btnl10	192194	butyrophilin-like 10	protein-coding
ENSMUSG00000091639	1081.59	1.75742	1.94495	0.000827949	0.0357096	Gm3756	100042266	tubulin, alpha 1B pseudogene	pseudo
ENSMUSG00000071654	1305.01	0.465774	0.294393	0.000837087	0.0360255	Uqcc3	107197	ubiquinol-cytochrome c reductase complex assembly factor 3	protein-coding
ENSMUSG00000032518	9187.59	-0.587764	0.432783	0.000847149	0.0363798	Rpsa	16785	ribosomal protein SA	protein-coding
ENSMUSG00000035232	532.532	-0.597505	0.445421	0.000857738	0.0366762	Pdk3	236900	pyruvate dehydrogenase kinase, isoenzyme 3	protein-coding
ENSMUSG00000042063	1120.3	-0.40703	0.230278	0.000866361	0.0369654	Zfp386	56220	zinc finger protein 386 (Kruppel-like)	protein-coding
ENSMUSG00000020263	1018.72	-0.642878	0.498762	0.000871237	0.0370938	Appl2	216190	adaptor protein, phosphotyrosine interaction, PH domain and leucine zipper containing 2	protein-coding
ENSMUSG00000017929	475.868	0.524532	0.365609	0.000873617	0.0371157	B4galt5	56336	UDP-Gal:betaGlcNAc beta 1,4-galactosyltransferase, polypeptide 5	protein-coding
ENSMUSG00000006740	3435.05	-0.407823	0.232539	0.000883809	0.0374686	Kif5b	16573	kinesin family member 5B	protein-coding
ENSMUSG00000038422	524.737	0.590677	0.443082	0.00088969	0.0376377	Hdhd3	72748	haloacid dehalogenase-like hydrolase domain containing 3	protein-coding
ENSMUSG00000042474	35.1039	0.919055	0.857556	0.000908957	0.0383711	Fcmr	69169	Fc fragment of IgM receptor	protein-coding
ENSMUSG00000021756	1625.09	-0.560153	0.413051	0.000920873	0.0387918	Il6st	16195	interleukin 6 signal transducer	protein-coding
ENSMUSG00000001930	341.029	0.809727	0.712837	0.00092737	0.0389829	Vwf	22371	Von Willebrand factor	protein-coding
ENSMUSG00000014791	24.5791	-1.8305	2.11236	0.000929961	0.0390093	Elmo3	234683	engulfment and cell motility 3	protein-coding
ENSMUSG00000032050	1511.01	-0.419394	0.251148	0.000948817	0.0397165	Rdx	19684	radixin	protein-coding
ENSMUSG00000039478	515.221	-0.579767	0.4457	0.000985191	0.0410661	Micu3	78506	mitochondrial calcium uptake family, member 3	protein-coding
ENSMUSG00000078735	31.2153	3.15381	3.75725	0.000994022	0.0413476	Il11ra2	16158	interleukin 11 receptor, alpha chain 2	protein-coding
ENSMUSG00000073705	341.7	0.680091	0.569203	0.00100325	0.0416161	Cenps	69928	centromere protein S	protein-coding
ENSMUSG00000089951	539.442	-0.578499	0.447197	0.00100466	0.0416161	Zfp968-ps	100302432	zinc finger protein 968, pseudogene	pseudo
ENSMUSG00000056738	12.9125	2.27397	2.68455	0.00101147	0.0417661	A730036I17Rik	329513	RIKEN cDNA A730036I17 gene	ncRNA
ENSMUSG00000035329	146.103	0.83601	0.7779	0.00101249	0.0417661	Fbxo33	70611	F-box protein 33	protein-coding
ENSMUSG00000033526	1865.3	-0.443937	0.286567	0.00101775	0.0418961	Ppip5k1	327655	diphosphoinositol pentakisphosphate kinase 1	protein-coding
ENSMUSG00000026640	1693.28	0.512126	0.372919	0.00104671	0.0428638	Plxna2	18845	plexin A2	protein-coding
ENSMUSG00000000708	112.39	0.782284	0.713121	0.00104784	0.0428638	Kat2b	18519	K(lysine) acetyltransferase 2B	protein-coding
ENSMUSG00000039246	856.263	0.412583	0.250865	0.00104819	0.0428638	Lyplal1	226791	lysophospholipase-like 1	protein-coding
ENSMUSG00000022906	57.748	-1.1672	1.32789	0.00104988	0.0428638	Parp9	80285	poly (ADP-ribose) polymerase family, member 9	protein-coding
ENSMUSG00000024114	75.8894	1.34994	1.59969	0.00105597	0.0430243	Prss41	71003	protease, serine 41	protein-coding
ENSMUSG00000015013	2907.09	0.497581	0.356484	0.0010585	0.0430393	Trappc2l	59005	trafficking protein particle complex 2-like	protein-coding
ENSMUSG00000070343	421.557	0.763426	0.705405	0.00111284	0.0450636	Gm10288	100040540	ribosomal protein L11 pseudogene	pseudo
ENSMUSG00000066551	18143.7	-0.376885	0.213014	0.00112901	0.0455336	Hmgb1	15289	high mobility group box 1	protein-coding
ENSMUSG00000015501	1266.59	0.459796	0.317381	0.00113602	0.0457237	Hivep2	15273	human immunodeficiency virus type I enhancer binding protein 2	protein-coding
ENSMUSG00000054426	528.083	0.547645	0.430012	0.00114871	0.0461409	A930005H10Rik	68161	RIKEN cDNA A930005H10 gene	ncRNA
ENSMUSG00000015880	67.4717	-1.08387	1.25572	0.00115832	0.0464333	Ncapg	54392	non-SMC condensin I complex, subunit G	protein-coding
ENSMUSG00000000378	1596.01	-0.419319	0.269492	0.0011803	0.0472192	Ccm2	216527	cerebral cavernous malformation 2	protein-coding
ENSMUSG00000099604	5.05007	2.01009	2.53418	0.00120268	0.0479217	Gm6651	626075	predicted gene 6651	pseudo
ENSMUSG00000024525	324.573	0.581602	0.482686	0.0012139	0.0482721	Impa2	114663	inositol monophosphatase 2	protein-coding
ENSMUSG00000034892	4443.35	0.490163	0.365769	0.00122766	0.0487218	Rps29	20090	ribosomal protein S29	protein-coding
ENSMUSG00000028402	335.036	-0.642718	0.571773	0.0012619	0.0499806	Mpdz	17475	multiple PDZ domain crumbs cell polarity complex component	protein-coding

## Sheet: DEGs En1 Swiss vs C57
	baseMean	log2FoldChange	lfcSE	pvalue	padj	symbol	entrez	geneID	biotype
ENSMUSG00000100801	29559.6	11.2397	0.373573	3.29846e-200	3.21567e-196	Gm15459	727711	heat shock protein 8 pseudogene	pseudo
ENSMUSG00000059040	9920.12	6.58223	0.267936	1.27975e-133	8.3175e-130	Eno1b	433182	enolase 1B, retrotransposed	protein-coding
ENSMUSG00000070713	1070.74	7.26204	0.397588	5.71917e-75	1.59303e-71	Gm10282	100042405	high mobility group nucleosomal binding domain 2 pseudogene	pseudo
ENSMUSG00000107470	2483.6	11.0805	0.654488	1.37445e-65	2.43628e-62	Gm3375	100041503	proteasome subunit beta type 5 precursor (proteasome epsilon chain) (Macropain epsilon chain) (multicatalytic endopeptidase complex epsilon chain) (proteasome subunit X) (proteasome chain 6)	pseudo
ENSMUSG00000084349	2819.18	11.0257	0.663026	2.27461e-63	3.69586e-60	Rpl3-ps1	100043000	ribosomal protein L3, pseudogene 1	pseudo
ENSMUSG00000069117	703.145	6.74503	0.43748	5.2419e-54	7.86204e-51	Rps18-ps6	100039740	ribosomal protein S18, pseudogene 6	pseudo
ENSMUSG00000080893	1021.92	9.6166	0.666736	5.11051e-48	6.64298e-45	Ndufa12-ps	112590811	NADH:ubiquinone oxidoreductase subunit A12, pseudogene	pseudo
ENSMUSG00000068396	737.836	8.95691	0.674082	5.24407e-41	6.39055e-38	Rpl34-ps1	619547	ribosomal protein L34, pseudogene 1	protein-coding
ENSMUSG00000117621	565.681	9.17229	0.74106	5.97452e-36	6.85242e-33	Hspe1-rs1	628438	heat shock protein 1 (chaperonin 10), related sequence 1	pseudo
ENSMUSG00000042369	614.335	4.19264	0.337223	1.25224e-35	1.35645e-32	Rbm45	241490	RNA binding motif protein 45	protein-coding
ENSMUSG00000066878	2308.54	14.1946	1.23194	6.68031e-34	6.51263e-31	Gm10184	100043906	karyopherin (importin) alpha 2 pseudogene	pseudo
ENSMUSG00000018362	1911.7	-4.63323	0.384023	1.08651e-33	1.0088e-30	Kpna2	16647	karyopherin (importin) alpha 2	protein-coding
ENSMUSG00000091957	3344.41	5.7187	0.477045	2.23231e-33	1.97844e-30	Rps2-ps10	667279	ribosomal protein S2, pseudogene 10	pseudo
ENSMUSG00000113061	549.655	8.4167	0.72203	5.06883e-32	4.29704e-29	Rps18-ps5	100042388	ribosomal protein S18, pseudogene 5	pseudo
ENSMUSG00000078139	618.254	8.79416	0.7924	2.60498e-29	1.88118e-26	AK157302	432732	cDNA sequence AK157302	pseudo
ENSMUSG00000047347	298.054	8.60304	0.77527	2.8733e-29	2.00084e-26	Tdg-ps	545124	thymine DNA glycosylase, pseudogene	protein-coding
ENSMUSG00000030532	1597.44	2.27046	0.243769	4.25573e-23	2.86132e-20	Hddc3	68695	HD domain containing 3	protein-coding
ENSMUSG00000035726	1703.96	2.62952	0.276781	1.57617e-22	1.02441e-19	Supt16	114741	SPT16, facilitates chromatin remodeling subunit	protein-coding
ENSMUSG00000078249	809.879	12.0358	1.30593	4.94264e-22	2.83446e-19	Hmga1b	111241	high mobility group AT-hook 1B	protein-coding
ENSMUSG00000107383	584.401	6.50312	0.682411	7.01784e-22	3.90954e-19	Gm4366	100043330	eukaryotic translation elongation factor 1 gamma pseudogene	pseudo
ENSMUSG00000096449	364.846	9.5888	1.02734	1.35583e-21	7.34332e-19	LOC118568041	118568041	NADH-ubiquinone oxidoreductase chain 5-like	pseudo
ENSMUSG00000048087	421.956	11.5574	1.26446	1.71863e-21	9.0567e-19	Gm4737	11615	predicted gene 4737	protein-coding
ENSMUSG00000030761	397.821	-4.33481	0.474132	4.27117e-20	2.19156e-17	Myo7a	17921	myosin VIIA	protein-coding
ENSMUSG00000056608	1748.49	-2.6427	0.309808	9.23317e-19	4.39093e-16	Chd9	109151	chromodomain helicase DNA binding protein 9	protein-coding
ENSMUSG00000058174	273.938	-3.99536	0.477176	4.01777e-17	1.74086e-14	Gm5148	381438	predicted gene 5148	protein-coding
ENSMUSG00000094242	116.082	6.82459	0.854318	5.50169e-16	2.10337e-13	Gm5456	432817	esterase D/formylglutathione hydrolase pseudogene	pseudo
ENSMUSG00000068141	137.45	9.83564	1.26883	9.8438e-16	3.6214e-13	Gm10232	100040029	predicted pseudogene 10232	pseudo
ENSMUSG00000032959	16746.5	-1.28838	0.170564	2.16039e-15	7.52203e-13	Pebp1	23980	phosphatidylethanolamine binding protein 1	protein-coding
ENSMUSG00000069996	120.382	7.03356	0.934166	1.91904e-14	6.34194e-12	Gm41341	105245971	predicted gene, 41341	ncRNA
ENSMUSG00000073876	130.086	4.31106	0.579519	6.90252e-14	2.20632e-11	Gm13305	100042555	predicted gene 13305	protein-coding
ENSMUSG00000094828	141.634	7.1232	0.969941	7.56422e-14	2.37882e-11	Trav3-3	320898	T cell receptor alpha variable 3-3	other
ENSMUSG00000073427	538.125	1.7831	0.27433	8.9375e-14	2.76609e-11	Gm4924	237412	predicted gene 4924	protein-coding
ENSMUSG00000033808	594.791	3.71987	0.511271	2.15593e-13	6.46714e-11	Tmem87a	211499	transmembrane protein 87A	protein-coding
ENSMUSG00000101431	115.315	6.76546	0.948692	4.02892e-13	1.19024e-10	Gm7901	666036	3-phosphoglycerate dehydrogenase pseudogene	pseudo
ENSMUSG00000020629	1193.16	1.01	0.14757	1.25686e-12	3.60385e-10	Adi1	104923	acireductone dioxygenase 1	protein-coding
ENSMUSG00000118653	89.9752	-21.0346	3.53101	2.06547e-12	5.67219e-10	Gm2296	100039535	ubiquitin-conjugating enzyme E2S pseudogene	pseudo
ENSMUSG00000114133	1300.91	2.16331	0.357688	2.56696e-12	6.95148e-10	Gm20075	100504125	basic transcription factor 3-like 4 pseudogene	pseudo
ENSMUSG00000073643	2351.86	2.3688	0.385665	4.23382e-12	1.13084e-09	Wdfy1	69368	WD repeat and FYVE domain containing 1	protein-coding
ENSMUSG00000044533	4447.41	-3.46279	0.510991	5.56857e-12	1.42863e-09	Rps2	16898	ribosomal protein S2	protein-coding
ENSMUSG00000112693	71.6318	8.97658	1.35486	5.85319e-12	1.48215e-09	Gm5512	433224	required for meiotic nuclear division 1 pseudogene	pseudo
ENSMUSG00000006638	380.252	3.02469	0.469567	1.79508e-11	4.37506e-09	Abhd1	57742	abhydrolase domain containing 1	protein-coding
ENSMUSG00000037025	48.6523	20.8146	3.76279	2.08277e-11	5.01355e-09	Foxa2	15376	forkhead box A2	protein-coding
ENSMUSG00000033036	90.7483	7.80631	1.20457	2.58251e-11	6.06673e-09	Gm7879	665989	peptidyl prolyl isomerase H pseudogene	pseudo
ENSMUSG00000035929	116.543	8.37425	1.30441	3.04525e-11	7.06861e-09	H2-Q4	15015	histocompatibility 2, Q region locus 4	protein-coding
ENSMUSG00000042770	243.433	3.19064	0.503162	5.20228e-11	1.16591e-08	Hebp1	15199	heme binding protein 1	protein-coding
ENSMUSG00000026113	2257.37	2.29518	0.406992	5.79555e-11	1.28411e-08	Inpp4a	269180	inositol polyphosphate-4-phosphatase, type I	protein-coding
ENSMUSG00000003039	4351.03	1.06657	0.176637	2.00436e-10	4.34234e-08	Fam32a	67922	family with sequence similarity 32, member A	protein-coding
ENSMUSG00000032305	586.732	-1.83329	0.348355	2.08123e-10	4.45933e-08	Fam219b	78323	family with sequence similarity 219, member B	protein-coding
ENSMUSG00000061477	3772.68	-1.70155	0.32198	2.87649e-10	6.09627e-08	Rps7	20115	ribosomal protein S7	protein-coding
ENSMUSG00000042962	207.388	6.44553	1.04445	2.94599e-10	6.17644e-08	Gm5436	432676	ATP synthase, H+ transporting, mitochondrial F1 complex, O subunit pseudogene	pseudo
ENSMUSG00000005681	50.2248	-8.1002	1.33518	3.22534e-10	6.69017e-08	Apoa2	11807	apolipoprotein A-II	protein-coding
ENSMUSG00000039126	1601.31	3.29873	0.544812	3.44064e-10	7.06164e-08	Prune2	353211	prune homolog 2	protein-coding
ENSMUSG00000075391	281.592	23.9064	4.55287	4.42589e-10	8.92672e-08	Glo1-ps	654354	glyoxalase 1, pseudogene	pseudo
ENSMUSG00000035199	3667.77	1.50534	0.28009	6.07255e-10	1.20819e-07	Arl6ip5	65106	ADP-ribosylation factor-like 6 interacting protein 5	protein-coding
ENSMUSG00000028656	1643.99	1.43135	0.262983	7.36369e-10	1.45028e-07	Cap1	12331	CAP, adenylate cyclase-associated protein 1 (yeast)	protein-coding
ENSMUSG00000063524	38119.6	-1.2304	0.219223	1.18214e-09	2.30493e-07	Eno1	13806	enolase 1, alpha non-neuron	protein-coding
ENSMUSG00000083623	31.9606	7.93287	1.35886	1.37875e-09	2.63558e-07	Gm7224	637913	F-box protein 34 pseudogene	pseudo
ENSMUSG00000072676	6557.78	-1.83139	0.37429	1.70539e-09	3.22832e-07	Tmem254a	66039	transmembrane protein 254a	protein-coding
ENSMUSG00000110126	53.1612	6.93538	1.19081	2.12562e-09	3.90994e-07	Gm9347	668771	3-phosphoglycerate dehydrogenase pseudogene	pseudo
ENSMUSG00000042073	139.029	-4.05839	0.694994	2.60778e-09	4.75201e-07	Abhd14b	76491	abhydrolase domain containing 14b	protein-coding
ENSMUSG00000100622	51.0753	3.9905	0.687593	3.07339e-09	5.4977e-07	Gm20379	115488195	predicted gene, 20379	protein-coding
ENSMUSG00000095595	3828.03	-1.17276	0.214728	3.63918e-09	6.3925e-07	Fam177a	73385	family with sequence similarity 177, member A	protein-coding
ENSMUSG00000057657	41.5079	5.3478	0.92623	4.13035e-09	7.1905e-07	Rps18-ps3	100042791	ribosomal protein S18, pseudogene 3	pseudo
ENSMUSG00000039601	3124.11	-1.86002	0.394459	4.27729e-09	7.38042e-07	Rcan2	53901	regulator of calcineurin 2	protein-coding
ENSMUSG00000028989	24.7903	7.62438	1.35873	5.76411e-09	9.77292e-07	Angptl7	654812	angiopoietin-like 7	protein-coding
ENSMUSG00000071178	40.8086	8.28511	1.53623	1.46595e-08	2.40194e-06	Serpina1b	20701	serine (or cysteine) preptidase inhibitor, clade A, member 1B	protein-coding
ENSMUSG00000084383	2481.81	8.40372	1.56658	1.6195e-08	2.60967e-06	Gm13370	100046290	ribosomal protein L21 pseudogene	pseudo
ENSMUSG00000086938	42.5381	-7.8742	1.46641	1.9704e-08	3.14908e-06	4930481A15Rik	74931	RIKEN cDNA 4930481A15 gene	ncRNA
ENSMUSG00000002396	263.861	1.51178	0.321891	1.9955e-08	3.16328e-06	Ocel1	77090	occludin/ELL domain containing 1	protein-coding
ENSMUSG00000029836	4430.17	-1.02469	0.199452	3.0706e-08	4.71422e-06	Cbx3	12417	chromobox 3	protein-coding
ENSMUSG00000070583	110.971	2.59869	0.581787	7.76683e-08	1.15601e-05	Fv1	14349	Friend virus susceptibility 1	protein-coding
ENSMUSG00000023764	876.02	1.98765	0.484751	9.08147e-08	1.34144e-05	Sfi1	78887	Sfi1 homolog, spindle assembly associated (yeast)	protein-coding
ENSMUSG00000069899	98.9289	5.4576	1.06441	1.19568e-07	1.7398e-05	Gm12166	100039624	SFT2 domain containing 1 pseudogene	pseudo
ENSMUSG00000060860	1258.21	-1.06485	0.22223	1.43576e-07	2.07367e-05	Ube2s	77891	ubiquitin-conjugating enzyme E2S	protein-coding
ENSMUSG00000047676	1624.13	7.10313	1.41686	1.47894e-07	2.12032e-05	Rpsa-ps10	100040633	ribosomal protein SA, pseudogene 10	pseudo
ENSMUSG00000027086	539.331	-1.19203	0.256291	1.70457e-07	2.41442e-05	Fastkd1	320720	FAST kinase domains 1	protein-coding
ENSMUSG00000082815	32.6125	6.72766	1.34503	1.71565e-07	2.41442e-05	Gm5678	435489	carbonyl reductase 1 pseudogene	pseudo
ENSMUSG00000064356	14436.4	-1.20535	0.262461	2.05601e-07	2.86344e-05	ATP8	17706	ATP synthase F0 subunit 8	protein-coding
ENSMUSG00000002076	67.5143	2.70285	0.635271	2.45706e-07	3.39772e-05	Hsf2bp	74377	heat shock transcription factor 2 binding protein	protein-coding
ENSMUSG00000092178	44.6083	-7.79328	1.61573	2.67326e-07	3.67065e-05	Gm45351	72716	predicted gene 45351	ncRNA
ENSMUSG00000057000	90.9215	-17.484	5.34746	2.98224e-07	4.06628e-05	Nxf3	245610	nuclear RNA export factor 3	protein-coding
ENSMUSG00000024993	2382.13	1.00751	0.217722	3.23459e-07	4.31973e-05	Dennd10	67894	DENN domain containing 10	protein-coding
ENSMUSG00000002324	94.1383	-5.0675	1.05387	4.41063e-07	5.85024e-05	Rec8	56739	REC8 meiotic recombination protein	protein-coding
ENSMUSG00000068231	50.1919	5.24529	1.09676	4.90465e-07	6.46155e-05	Vmn1r43	113847	vomeronasal 1 receptor 43	protein-coding
ENSMUSG00000029064	5745.43	1.13014	0.255979	5.65291e-07	7.34763e-05	Gnb1	14688	guanine nucleotide binding protein (G protein), beta 1	protein-coding
ENSMUSG00000032346	99.2918	-2.98235	0.709389	5.66661e-07	7.34763e-05	Ooep	67968	oocyte expressed protein	protein-coding
ENSMUSG00000054414	505.212	-1.37928	0.336245	5.69028e-07	7.34763e-05	Slc30a7	66500	solute carrier family 30 (zinc transporter), member 7	protein-coding
ENSMUSG00000062006	1946.37	-1.21824	0.282304	5.82572e-07	7.47302e-05	Rpl34	68436	ribosomal protein L34	protein-coding
ENSMUSG00000073402	19.0133	7.15823	1.5347	5.87992e-07	7.48076e-05	Gm8909	667977	predicted gene 8909	protein-coding
ENSMUSG00000072494	58.7003	-4.87352	1.03282	5.90849e-07	7.48076e-05	Ppp1r3e	105651	protein phosphatase 1, regulatory subunit 3E	protein-coding
ENSMUSG00000050100	55.573	-16.425	5.47795	6.68912e-07	8.30729e-05	Hmx2	15372	H6 homeobox 2	protein-coding
ENSMUSG00000021182	348.81	-1.28588	0.310015	7.79428e-07	9.61853e-05	Ccdc88c	68339	coiled-coil domain containing 88C	protein-coding
ENSMUSG00000041959	2589.34	-2.8689	0.712813	8.00143e-07	9.81207e-05	S100a10	20194	S100 calcium binding protein A10 (calpactin)	protein-coding
ENSMUSG00000053835	136.463	-2.90575	0.729934	9.84406e-07	0.000119962	H2-T24	15042	histocompatibility 2, T region locus 24	protein-coding
ENSMUSG00000050534	169.765	-5.09603	1.12732	1.14455e-06	0.000137756	Htr5b	15564	5-hydroxytryptamine (serotonin) receptor 5B	protein-coding
ENSMUSG00000027224	141.736	4.63024	1.03466	1.19986e-06	0.000143527	Duoxa1	213696	dual oxidase maturation factor 1	protein-coding
ENSMUSG00000097574	93.8179	-2.65927	0.709854	1.26833e-06	0.000148975	C920006O11Rik	320295	RIKEN cDNA C920006O11 gene	ncRNA
ENSMUSG00000021880	62.2526	-7.61845	1.74111	1.29191e-06	0.000150836	Rnase6	78416	ribonuclease, RNase A family, 6	protein-coding
ENSMUSG00000025575	1754.44	1.09027	0.259236	1.36029e-06	0.000157875	Cant1	76025	calcium activated nucleotidase 1	protein-coding
ENSMUSG00000025878	488.832	1.19559	0.293153	1.47424e-06	0.000170087	Uimc1	20184	ubiquitin interaction motif containing 1	protein-coding
ENSMUSG00000038738	2672.62	-1.36104	0.354504	1.54099e-06	0.000176743	Shank1	243961	SH3 and multiple ankyrin repeat domains 1	protein-coding
ENSMUSG00000060461	49.5777	-4.17126	0.970892	1.64268e-06	0.000187304	Dppa5a	434423	developmental pluripotency associated 5A	protein-coding
ENSMUSG00000064341	75374.3	-0.99602	0.237136	1.66408e-06	0.000188641	ND1	17716	NADH dehydrogenase subunit 1	protein-coding
ENSMUSG00000097245	35.6056	4.06968	0.955414	1.71249e-06	0.000193007	Gm5421	432438	aconitase 2, mitochondrial pseudogene	pseudo
ENSMUSG00000097360	48.8208	-2.86195	0.763542	1.79789e-06	0.000201467	9430065F17Rik	77857	RIKEN cDNA 9430065F17 gene	ncRNA
ENSMUSG00000097511	145.543	-1.39282	0.372162	1.81535e-06	0.000202262	Gm16677	100504477	predicted gene, 16677	ncRNA
ENSMUSG00000069539	385.921	1.13015	0.277652	1.90367e-06	0.000210897	Scyl2	213326	SCY1-like 2 (S. cerevisiae)	protein-coding
ENSMUSG00000092260	576.642	1.37091	0.365103	1.92355e-06	0.000211895	Zfp963	620419	zinc finger protein 963	protein-coding
ENSMUSG00000094347	284.428	-1.35598	0.36049	2.01261e-06	0.00022046	Olfr784	258724	olfactory receptor 784	protein-coding
ENSMUSG00000008668	3820.04	-1.066	0.260065	2.06144e-06	0.000224547	Rps18	20084	ribosomal protein S18	protein-coding
ENSMUSG00000033751	1196.23	-0.829449	0.200925	2.19696e-06	0.000236664	Gadd45gip1	102060	growth arrest and DNA-damage-inducible, gamma interacting protein 1	protein-coding
ENSMUSG00000018217	1432.95	-2.96013	0.806616	2.57134e-06	0.00027404	Pmp22	18858	peripheral myelin protein 22	protein-coding
ENSMUSG00000018238	30.8608	-7.0583	1.69669	2.57203e-06	0.00027404	Gdf9	14566	growth differentiation factor 9	protein-coding
ENSMUSG00000110275	34.0977	4.71972	1.15361	3.24095e-06	0.000339742	Gm5905	546015	ribosomal protein S9 pseudogene	pseudo
ENSMUSG00000028426	675.262	-1.06981	0.271111	3.29194e-06	0.000343242	Rad23b	19359	RAD23 homolog B, nucleotide excision repair protein	protein-coding
ENSMUSG00000055401	895.738	1.05762	0.268549	3.46079e-06	0.000358928	Fbxo6	50762	F-box protein 6	protein-coding
ENSMUSG00000095991	22.8085	6.38299	1.58448	3.84422e-06	0.000394498	Gm17048	100417765	predicted gene 17048	pseudo
ENSMUSG00000028833	20160.7	0.679697	0.174424	4.01272e-06	0.000409634	Ncdn	26562	neurochondrin	protein-coding
ENSMUSG00000032018	2625.08	-1.16504	0.308342	4.08135e-06	0.00041447	Sc5d	235293	sterol-C5-desaturase	protein-coding
ENSMUSG00000084890	38.2326	5.72887	1.44796	4.67745e-06	0.000472544	A830036E02Rik	353123	RIKEN cDNA A830036E02 gene	ncRNA
ENSMUSG00000059751	572.804	8.36965	2.3122	5.36551e-06	0.000539262	Rps3a3	668144	ribosomal protein S3A3	pseudo
ENSMUSG00000021193	2189.7	1.08196	0.290936	6.0681e-06	0.00059897	Pitrm1	69617	pitrilysin metallepetidase 1	protein-coding
ENSMUSG00000093953	103.786	-5.214	1.36563	6.08247e-06	0.00059897	Trav3d-3	100043202	T cell receptor alpha variable 3D-3	other
ENSMUSG00000007908	959.028	-1.24474	0.35417	6.20897e-06	0.000607683	Hmgcll1	208982	3-hydroxymethyl-3-methylglutaryl-Coenzyme A lyase-like 1	protein-coding
ENSMUSG00000078747	407.384	1.80497	0.606183	6.23329e-06	0.000607683	Gm20878	100041579	predicted gene, 20878	protein-coding
ENSMUSG00000114442	94.2449	3.58716	1.01331	6.34206e-06	0.000613933	F630042J09Rik	100038627	RIKEN cDNA F630042J09 gene	ncRNA
ENSMUSG00000099354	29.2076	-5.64649	1.48578	6.36037e-06	0.000613933	1700124L16Rik	67934	RIKEN cDNA 1700124L16 gene	ncRNA
ENSMUSG00000068479	2060.05	0.68232	0.1842	7.29667e-06	0.000697404	Mfap1a	67532	microfibrillar-associated protein 1A	protein-coding
ENSMUSG00000116637	14.7432	6.43757	1.77984	8.37643e-06	0.000789003	Gm8130	666489	ribosomal protein S3 pseudogene	pseudo
ENSMUSG00000079012	19.4364	6.79767	1.90893	8.75041e-06	0.000815513	Serpina3m	20717	serine (or cysteine) peptidase inhibitor, clade A, member 3M	protein-coding
ENSMUSG00000030423	1498.67	-0.998602	0.274348	8.76327e-06	0.000815513	Pop4	66161	processing of precursor 4, ribonuclease P/MRP family, (S. cerevisiae)	protein-coding
ENSMUSG00000062353	546.883	8.44116	2.5628	8.78335e-06	0.000815513	Gm15772	100034726	ribosomal protein L26 pseudogene	pseudo
ENSMUSG00000032579	602.22	0.968365	0.269746	1.03657e-05	0.000953219	Hemk1	69536	HemK methyltransferase family member 1	protein-coding
ENSMUSG00000070436	818.244	-1.87567	0.677083	1.04132e-05	0.000953219	Serpinh1	12406	serine (or cysteine) peptidase inhibitor, clade H, member 1	protein-coding
ENSMUSG00000027227	1185.86	-1.34049	0.425058	1.05174e-05	0.000958261	Sord	20322	sorbitol dehydrogenase	protein-coding
ENSMUSG00000041453	6487.33	-0.932566	0.262762	1.19182e-05	0.00107452	Rpl21	19933	ribosomal protein L21	protein-coding
ENSMUSG00000040387	1876.49	0.693529	0.196175	1.19315e-05	0.00107452	Klhl32	212390	kelch-like 32	protein-coding
ENSMUSG00000044229	362.869	-1.31337	0.419047	1.19587e-05	0.00107452	Nxpe4	244853	neurexophilin and PC-esterase domain family, member 4	protein-coding
ENSMUSG00000093954	73.4172	-4.06723	1.2405	1.28116e-05	0.00114587	Gm16867	100862085	predicted gene, 16867	protein-coding
ENSMUSG00000046637	115.868	-1.31013	0.422501	1.2982e-05	0.00115581	Ttc34	242800	tetratricopeptide repeat domain 34	protein-coding
ENSMUSG00000082935	34.7561	4.34022	1.31117	1.30953e-05	0.0011606	Gm7658	665489	eukaryotic translation initiation factor 3, subunit M pseudogene	pseudo
ENSMUSG00000052560	1262.8	-1.49212	0.523719	1.37626e-05	0.00121422	Cpne8	66871	copine VIII	protein-coding
ENSMUSG00000114547	2023.79	5.42339	1.66888	1.6162e-05	0.00141949	Gm3226	100041240	tubulin, alpha 1B pseudogene	pseudo
ENSMUSG00000006021	1404.12	0.915928	0.269133	1.71946e-05	0.00150341	Kptn	70394	kaptin	protein-coding
ENSMUSG00000041653	240.173	2.00954	0.785781	1.73596e-05	0.00150977	Pnpla3	116939	patatin-like phospholipase domain containing 3	protein-coding
ENSMUSG00000032870	1085.37	-0.616494	0.182988	1.74222e-05	0.00150977	Smap2	69780	small ArfGAP 2	protein-coding
ENSMUSG00000023236	16966.9	0.935911	0.279615	1.91983e-05	0.00165632	Scg5	20394	secretogranin V	protein-coding
ENSMUSG00000094966	37.5291	6.2544	2.05369	2.086e-05	0.00179176	Trav9-2	436479	T cell receptor alpha variable 9-2	other
ENSMUSG00000092444	14.7176	6.2196	2.06236	2.18576e-05	0.00186921	Gm18733	100417644	vacuolar protein sorting 52 pseudogene	pseudo
ENSMUSG00000023055	793.539	1.21601	0.409402	2.24229e-05	0.00190918	Calcoco1	67488	calcium binding and coiled coil domain 1	protein-coding
ENSMUSG00000117438	21.1443	3.63799	1.29266	2.41588e-05	0.00204804	Rpsa-ps7	433141	ribosomal protein SA, pseudogene 7	pseudo
ENSMUSG00000026458	971.071	-1.15524	0.383571	2.45489e-05	0.0020721	Ppfia4	68507	protein tyrosine phosphatase, receptor type, f polypeptide (PTPRF), interacting protein (liprin), alpha 4	protein-coding
ENSMUSG00000029005	41.5406	-3.8142	1.35306	2.54339e-05	0.00212889	Draxin	70433	dorsal inhibitory axon guidance protein	protein-coding
ENSMUSG00000031594	34.0703	-6.88224	2.43108	2.54401e-05	0.00212889	Fgl1	234199	fibrinogen-like protein 1	protein-coding
ENSMUSG00000000384	370.121	1.1196	0.370601	2.6514e-05	0.00219987	Tbrg4	21379	transforming growth factor beta regulated gene 4	protein-coding
ENSMUSG00000045257	464.029	-1.12061	0.373966	2.77126e-05	0.00227992	Morn2	378462	MORN repeat containing 2	protein-coding
ENSMUSG00000070605	359.451	1.52242	0.614607	2.85637e-05	0.00233966	Zfp992	433791	zinc finger protein 992	protein-coding
ENSMUSG00000047719	1158.93	0.82604	0.25802	2.86788e-05	0.00233966	Ubiad1	71707	UbiA prenyltransferase domain containing 1	protein-coding
ENSMUSG00000031767	160.055	-2.33949	1.00304	3.20862e-05	0.0025852	Nudt7	67528	nudix (nucleoside diphosphate linked moiety X)-type motif 7	protein-coding
ENSMUSG00000039410	302.979	-1.50019	0.617872	3.26115e-05	0.0026167	Prdm16	70673	PR domain containing 16	protein-coding
ENSMUSG00000024734	54.5485	-4.02072	1.50252	3.37958e-05	0.00270062	Zp1	22786	zona pellucida glycoprotein 1	protein-coding
ENSMUSG00000091639	1081.59	4.43153	1.6308	3.40199e-05	0.00270743	Gm3756	100042266	tubulin, alpha 1B pseudogene	pseudo
ENSMUSG00000094413	21.4232	-5.61012	2.05549	3.45989e-05	0.00273122	Trav15n-1	100126452	T cell receptor alpha variable 15N-1	other
ENSMUSG00000097785	152.103	-2.17666	0.963571	3.53967e-05	0.00277522	B230217O12Rik	320879	RIKEN cDNA B230217O12 gene	ncRNA
ENSMUSG00000059939	976.181	1.1674	0.417623	3.54766e-05	0.00277522	9430015G10Rik	230996	RIKEN cDNA 9430015G10 gene	protein-coding
ENSMUSG00000005892	688.019	-5.60503	2.06851	3.55834e-05	0.00277522	Trh	22044	thyrotropin releasing hormone	protein-coding
ENSMUSG00000026596	480.082	-0.857394	0.281055	3.91772e-05	0.00301928	Abl2	11352	v-abl Abelson murine leukemia viral oncogene 2 (arg, Abelson-related gene)	protein-coding
ENSMUSG00000055024	485.143	-0.846702	0.278546	4.03693e-05	0.00308674	Ep300	328572	E1A binding protein p300	protein-coding
ENSMUSG00000031558	891.133	-1.86084	0.858389	4.20618e-05	0.0032036	Slit2	20563	slit guidance ligand 2	protein-coding
ENSMUSG00000027544	896.623	0.593182	0.19854	4.41414e-05	0.00334891	Nfatc2	18019	nuclear factor of activated T cells, cytoplasmic, calcineurin dependent 2	protein-coding
ENSMUSG00000101523	46.9283	6.92941	2.94478	4.64721e-05	0.00351206	Csnk2a1-ps3	100039026	casein kinase 2, alpha 1 polypeptide, pseudogene 3	pseudo
ENSMUSG00000030990	1429.53	-0.807965	0.275651	5.17043e-05	0.00389239	Pgap2	233575	post-GPI attachment to proteins 2	protein-coding
ENSMUSG00000083773	8111.23	5.93424	2.46586	5.24888e-05	0.00392478	Gm13394	100033452	glyceraldehyde-3-phosphate dehydrogenase pseudogene	pseudo
ENSMUSG00000087461	284.666	2.07849	1.00629	5.26275e-05	0.00392478	C230014O12Rik	329387	RIKEN cDNA C230014O12 gene	ncRNA
ENSMUSG00000028452	19285.3	-0.799433	0.273462	5.27383e-05	0.00392478	Vcp	269523	valosin containing protein	protein-coding
ENSMUSG00000095597	1622.32	4.82398	1.99365	5.47678e-05	0.00406031	Rps7-ps3	624124	ribosomal protein S7, pseudogene 3	pseudo
ENSMUSG00000107157	23.1077	4.96483	2.0769	5.72685e-05	0.00422963	Gm3170	100417763	predicted gene 3170	pseudo
ENSMUSG00000070730	2536.96	0.566553	0.197605	5.76745e-05	0.00424354	Rmdn3	67809	regulator of microtubule dynamics 3	protein-coding
ENSMUSG00000037443	507.556	-1.22418	0.50846	5.93777e-05	0.00435243	Cep85	70012	centrosomal protein 85	protein-coding
ENSMUSG00000036353	906.336	0.862524	0.303774	5.97886e-05	0.00436614	P2ry12	70839	purinergic receptor P2Y, G-protein coupled 12	protein-coding
ENSMUSG00000021070	160.945	-1.37812	0.625273	6.05713e-05	0.00440679	Bdkrb2	12062	bradykinin receptor, beta 2	protein-coding
ENSMUSG00000050132	1075.7	-0.776441	0.271746	6.1009e-05	0.00442213	Sarm1	237868	sterile alpha and HEAT/Armadillo motif containing 1	protein-coding
ENSMUSG00000056895	898.504	1.40122	0.647101	6.23775e-05	0.00450458	H2bu2	78303	H2B.U histone 2	protein-coding
ENSMUSG00000032518	9187.59	-1.02196	0.382883	6.30762e-05	0.00453822	Rpsa	16785	ribosomal protein SA	protein-coding
ENSMUSG00000071470	21.7176	5.46312	2.37447	6.38187e-05	0.00457477	Ccnb1ip1	239083	cyclin B1 interacting protein 1	protein-coding
ENSMUSG00000022193	7996.36	-0.735467	0.259161	6.41144e-05	0.00457913	Psmb5	19173	proteasome (prosome, macropain) subunit, beta type 5	protein-coding
ENSMUSG00000045962	441.027	-0.987337	0.366548	6.49539e-05	0.00462216	Wnk1	232341	WNK lysine deficient protein kinase 1	protein-coding
ENSMUSG00000020695	85.5218	-1.91306	0.978478	6.59872e-05	0.00467861	Mrc2	17534	mannose receptor, C type 2	protein-coding
ENSMUSG00000056144	47.9101	-2.68477	1.31996	6.8528e-05	0.00484116	Trim34a	94094	tripartite motif-containing 34A	protein-coding
ENSMUSG00000054435	84.1283	1.96601	1.0164	6.90171e-05	0.00485811	Gimap4	107526	GTPase, IMAP family member 4	protein-coding
ENSMUSG00000019478	2624.2	0.814042	0.29361	7.09775e-05	0.00497812	Rab4a	19341	RAB4A, member RAS oncogene family	protein-coding
ENSMUSG00000073164	376.397	-1.20933	0.528489	7.45934e-05	0.00519437	2410018L13Rik	69732	RIKEN cDNA 2410018L13 gene	ncRNA
ENSMUSG00000083820	27.6272	4.35317	1.98907	7.60583e-05	0.00527753	Ndufs6b	623286	NADH:ubiquinone oxidoreductase subunit S6B	protein-coding
ENSMUSG00000023452	7793.94	0.798051	0.29231	7.79923e-05	0.00535456	Pisd	320951	phosphatidylserine decarboxylase	protein-coding
ENSMUSG00000063698	813.715	1.05237	0.433808	8.79248e-05	0.00601529	Sfxn4	94281	sideroflexin 4	protein-coding
ENSMUSG00000023439	33.7187	-6.1846	3.1711	9.13541e-05	0.00622805	Gnb3	14695	guanine nucleotide binding protein (G protein), beta 3	protein-coding
ENSMUSG00000031736	48.9862	-1.80154	0.997505	9.17703e-05	0.00623462	Crnde	71296	colorectal neoplasia differentially expressed (non-protein coding)	ncRNA
ENSMUSG00000001630	645.369	-0.794666	0.303672	9.74352e-05	0.0065434	Stk38l	232533	serine/threonine kinase 38 like	protein-coding
ENSMUSG00000052031	861.282	0.646253	0.244829	9.75639e-05	0.0065434	Tagap1	380608	T cell activation GTPase activating protein 1	protein-coding
ENSMUSG00000043192	32.7319	3.74847	1.88691	9.91822e-05	0.00662279	Gpi-ps	669429	glucose-6-phosphate isomerase, pseudogene	pseudo
ENSMUSG00000072653	715.625	0.974848	0.397649	0.000100402	0.00668137	Zfp783	232785	zinc finger protein 783	ncRNA
ENSMUSG00000050211	956.701	1.15658	0.532686	0.000101259	0.0067155	Pla2g4e	329502	phospholipase A2, group IVE	protein-coding
ENSMUSG00000066057	508.153	-0.944811	0.383129	0.000104087	0.00687965	Gm1976	100038746	predicted gene 1976	ncRNA
ENSMUSG00000030235	2477.01	0.854293	0.335762	0.000104994	0.00691611	Slco1c1	58807	solute carrier organic anion transporter family, member 1c1	protein-coding
ENSMUSG00000071112	137.245	4.37322	2.21724	0.000107299	0.00701426	Spx	319552	spexin hormone	protein-coding
ENSMUSG00000033634	34.5239	5.74492	3.03013	0.00010753	0.00701426	Nat8f2	93673	N-acetyltransferase 8 (GCN5-related) family member 2	protein-coding
ENSMUSG00000029127	283.382	0.856635	0.338686	0.000107563	0.00701426	Zbtb49	75079	zinc finger and BTB domain containing 49	protein-coding
ENSMUSG00000092365	216.31	6.83874	4.42322	0.000109333	0.00710594	BC023719	100416360	ribosomal protein S6 pseudogene	pseudo
ENSMUSG00000000120	44.102	-3.90709	2.06733	0.000119477	0.00772522	Ngfr	18053	nerve growth factor receptor (TNFR superfamily, member 16)	protein-coding
ENSMUSG00000114827	16.8389	3.25257	1.84254	0.000136299	0.00874198	Gm46432	108168103	predicted gene, 46432	pseudo
ENSMUSG00000040850	509.128	-0.741179	0.301817	0.000137854	0.0088127	Psme4	103554	proteasome (prosome, macropain) activator subunit 4	protein-coding
ENSMUSG00000095304	230.513	-1.6792	1.03473	0.000139272	0.00887426	Plac9a	211623	placenta specific 9a	protein-coding
ENSMUSG00000039478	515.221	-0.955606	0.426067	0.000146075	0.00927743	Micu3	78506	mitochondrial calcium uptake family, member 3	protein-coding
ENSMUSG00000116291	20.2583	3.79174	2.16343	0.000150553	0.00949993	Gm4383	100043354	high mobility group box 2 pseudogene	pseudo
ENSMUSG00000059325	567.8	-1.16076	0.614147	0.000152867	0.00958093	Hopx	74318	HOP homeobox	protein-coding
ENSMUSG00000024135	203.248	-1.60131	1.00635	0.000152949	0.00958093	Srbd1	78586	S1 RNA binding domain 1	protein-coding
ENSMUSG00000091020	10.2174	4.53604	2.65982	0.000165186	0.0102901	Gm5828	545306	TOX high mobility group box family member 4 pseudogene	pseudo
ENSMUSG00000034613	464.327	-0.872537	0.385838	0.000166965	0.0103678	Ppm1h	319468	protein phosphatase 1H (PP2C domain containing)	protein-coding
ENSMUSG00000021484	2971.97	0.414877	0.174706	0.000168283	0.0104164	Lman2	66890	lectin, mannose-binding 2	protein-coding
ENSMUSG00000028862	119.313	-1.59713	1.05032	0.000177757	0.0109681	Map3k6	53608	mitogen-activated protein kinase kinase kinase 6	protein-coding
ENSMUSG00000095730	38.0075	-2.78556	1.76022	0.000179179	0.0110209	Vmn2r29	76229	vomeronasal 2, receptor 29	protein-coding
ENSMUSG00000044068	1124.02	1.07626	0.565364	0.000180947	0.0110947	Zrsr1	22183	zinc finger (CCCH type), RNA binding motif and serine/arginine rich 1	protein-coding
ENSMUSG00000118425	34.4232	4.88956	3.09972	0.000194907	0.0119131	LOC101055676	101055676	protein FAM205A-2-like	protein-coding
ENSMUSG00000092074	2079.22	-0.862997	0.400282	0.000202041	0.0123106	Dynlt1a	100310872	dynein light chain Tctex-type 1A	protein-coding
ENSMUSG00000002846	631.658	1.08314	0.598863	0.000203688	0.0123723	Timmdc1	76916	translocase of inner mitochondrial membrane domain containing 1	protein-coding
ENSMUSG00000094125	31.7219	4.57987	2.93284	0.000207988	0.0125552	Gm13698	668096	CWC22 spliceosome-associated protein homolog pseudogene	pseudo
ENSMUSG00000065947	2419.39	-0.77513	0.350663	0.000210594	0.0126612	ND4L	17720	NADH dehydrogenase subunit 4L	protein-coding
ENSMUSG00000045268	135.557	1.89945	1.32735	0.000211041	0.0126612	Zfp691	195522	zinc finger protein 691	protein-coding
ENSMUSG00000035513	141.043	-3.1861	2.07068	0.00021205	0.0126827	Ntng2	171171	netrin G2	protein-coding
ENSMUSG00000033276	162.718	-1.05016	0.595939	0.000234315	0.0139715	Stk36	269209	serine/threonine kinase 36	protein-coding
ENSMUSG00000023259	923.664	0.852864	0.41188	0.000236382	0.0140518	Slc26a6	171429	solute carrier family 26, member 6	protein-coding
ENSMUSG00000028023	8341.24	-4.52557	3.06287	0.000239834	0.0142136	Pitx2	18741	paired-like homeodomain transcription factor 2	protein-coding
ENSMUSG00000021427	6602.46	0.537775	0.243361	0.000243784	0.0144011	Ssr1	107513	signal sequence receptor, alpha	protein-coding
ENSMUSG00000030965	1443.67	0.553509	0.250817	0.000244475	0.0144011	Abraxas2	109359	BRISC complex subunit	protein-coding
ENSMUSG00000045095	1681.11	1.16483	0.747232	0.000249378	0.0146455	Magi1	14924	membrane associated guanylate kinase, WW and PDZ domain containing 1	protein-coding
ENSMUSG00000037885	268.048	0.96342	0.516181	0.000250126	0.0146455	Stk35	67333	serine/threonine kinase 35	protein-coding
ENSMUSG00000093846	28.0949	-2.46867	1.76933	0.000255732	0.0149289	Gm4425	100043416	KRAB-domain protein pseudogene	pseudo
ENSMUSG00000055301	83.9078	-4.18793	2.87613	0.000257517	0.0149883	Adh7	11529	alcohol dehydrogenase 7 (class IV), mu or sigma polypeptide	protein-coding
ENSMUSG00000058126	1207.28	4.71887	3.3497	0.000258594	0.0150061	Tpm3-rs7	621054	tropomyosin 3, related sequence 7	pseudo
ENSMUSG00000064368	10326.3	-0.746713	0.354866	0.000263723	0.0152584	ND6	17722	NADH dehydrogenase subunit 6	protein-coding
ENSMUSG00000043091	5195.57	3.50114	2.499	0.00029014	0.0165414	Tuba1c	22146	tubulin, alpha 1C	protein-coding
ENSMUSG00000000560	2795.14	0.993355	0.584916	0.000292227	0.0166118	Gabra2	14395	gamma-aminobutyric acid (GABA) A receptor, subunit alpha 2	protein-coding
ENSMUSG00000021260	480.274	0.805912	0.404829	0.000293414	0.0166308	Hhipl1	214305	hedgehog interacting protein-like 1	protein-coding
ENSMUSG00000083674	74.9539	-1.71473	1.33447	0.000299124	0.0169053	Gm38402	171588	zinc finger protein pseudogene	pseudo
ENSMUSG00000073460	51.1617	-1.62411	1.27412	0.000308473	0.0173833	Pnldc1	240023	poly(A)-specific ribonuclease (PARN)-like domain containing 1	protein-coding
ENSMUSG00000096910	1266.45	0.798858	0.407857	0.000313216	0.0175997	Zfp955b	100043468	zinc finger protein 955B	protein-coding
ENSMUSG00000050148	896.865	-0.822002	0.42614	0.000314599	0.0176266	Ubqln2	54609	ubiquilin 2	protein-coding
ENSMUSG00000075705	148.829	0.90801	0.513492	0.00032824	0.0183381	Msrb1	27361	methionine sulfoxide reductase B1	protein-coding
ENSMUSG00000060036	8851.13	-0.754077	0.382417	0.000329804	0.0183729	Rpl3	27367	ribosomal protein L3	protein-coding
ENSMUSG00000027714	1690.25	-0.523205	0.253075	0.000331807	0.0183875	Exosc9	50911	exosome component 9	protein-coding
ENSMUSG00000027907	580.611	-1.39634	1.09832	0.000331952	0.0183875	S100a11	20195	S100 calcium binding protein A11	protein-coding
ENSMUSG00000006395	281.696	-0.927958	0.540742	0.000335307	0.0185207	Hyi	68180	hydroxypyruvate isomerase (putative)	protein-coding
ENSMUSG00000040935	15.0086	-3.74049	2.82337	0.000337671	0.0185986	Padi6	242726	peptidyl arginine deiminase, type VI	protein-coding
ENSMUSG00000020061	22.6986	4.61247	3.74852	0.00033955	0.0186494	Mybpc1	109272	myosin binding protein C, slow-type	protein-coding
ENSMUSG00000033450	209.987	2.46117	1.93652	0.00034686	0.0189791	Tagap	72536	T cell activation Rho GTPase activating protein	protein-coding
ENSMUSG00000022812	2703.8	-0.965509	0.596625	0.0003475	0.0189791	Gsk3b	56637	glycogen synthase kinase 3 beta	protein-coding
ENSMUSG00000036073	917.052	-0.749829	0.387724	0.000354452	0.0192638	Galt	14430	galactose-1-phosphate uridyl transferase	protein-coding
ENSMUSG00000062611	491.05	4.78719	4.36309	0.000354687	0.0192638	Rps3a2	100043780	ribosomal protein S3A2	pseudo
ENSMUSG00000025027	3542.69	0.501724	0.246512	0.000358482	0.0194158	Xpnpep1	170750	X-prolyl aminopeptidase (aminopeptidase P) 1, soluble	protein-coding
ENSMUSG00000051176	13.3248	4.29995	3.50288	0.000370908	0.0200332	Zfp42	22702	zinc finger protein 42	protein-coding
ENSMUSG00000029851	57.2693	-2.11673	1.7474	0.000379893	0.0204617	Tcaf2	232748	TRPM8 channel-associated factor 2	protein-coding
ENSMUSG00000022451	1939.02	0.714471	0.378065	0.000403623	0.02168	Twf1	19230	twinfilin actin binding protein 1	protein-coding
ENSMUSG00000055313	238.865	0.974134	0.664297	0.000414726	0.0222152	Pgbd1	319207	piggyBac transposable element derived 1	protein-coding
ENSMUSG00000028158	487.947	0.76204	0.418176	0.000418986	0.0223819	Mttp	17777	microsomal triglyceride transfer protein	protein-coding
ENSMUSG00000035505	739.871	0.559623	0.290044	0.000435693	0.0232108	Cox18	231430	cytochrome c oxidase assembly protein 18	protein-coding
ENSMUSG00000004885	113.198	-2.26232	1.94324	0.000443108	0.0235415	Crabp2	12904	cellular retinoic acid binding protein II	protein-coding
ENSMUSG00000028979	11.3807	3.66737	3.09511	0.000446534	0.023659	Masp2	17175	mannan-binding lectin serine peptidase 2	protein-coding
ENSMUSG00000023084	31.327	-3.72619	3.1901	0.000457494	0.0240625	Lrrc71	74485	leucine rich repeat containing 71	protein-coding
ENSMUSG00000038797	12.7928	3.20548	2.7016	0.000457851	0.0240625	Zscan2	22691	zinc finger and SCAN domain containing 2	protein-coding
ENSMUSG00000042379	235.93	-3.36125	2.84929	0.000462918	0.0242634	Esm1	71690	endothelial cell-specific molecule 1	protein-coding
ENSMUSG00000063320	321.175	-0.840984	0.516399	0.00046948	0.0245413	1190007I07Rik	544717	RIKEN cDNA 1190007I07 gene	protein-coding
ENSMUSG00000016995	237.155	1.00255	0.759889	0.000476095	0.0248206	Matn4	17183	matrilin 4	protein-coding
ENSMUSG00000065999	18.8169	2.03803	1.8257	0.000487182	0.0252635	Zfp985	433804	zinc finger protein 985	protein-coding
ENSMUSG00000027999	458.295	-0.626839	0.345592	0.000518877	0.0267647	Pla2g12a	66350	phospholipase A2, group XIIA	protein-coding
ENSMUSG00000052616	36.3748	1.33609	1.22765	0.000521607	0.0268345	Terb1	320022	telomere repeat binding bouquet formation protein 1	protein-coding
ENSMUSG00000068860	14.2812	3.65502	3.33504	0.000528542	0.0271198	Gm128	229588	predicted gene 128	protein-coding
ENSMUSG00000037331	1141.09	-0.716371	0.415738	0.000537241	0.0274938	Larp1	73158	La ribonucleoprotein domain family, member 1	protein-coding
ENSMUSG00000108470	18.2997	3.20914	2.8998	0.000547755	0.0279585	Gm4598	100043706	predicted gene 4598	ncRNA
ENSMUSG00000029554	1462.08	0.612676	0.342611	0.000553818	0.0281941	Mad1l1	17120	MAD1 mitotic arrest deficient 1-like 1	protein-coding
ENSMUSG00000024485	38.5798	1.28064	1.20656	0.00056989	0.0289368	Slc4a9	240215	solute carrier family 4, sodium bicarbonate cotransporter, member 9	protein-coding
ENSMUSG00000009535	2428.62	0.51017	0.283246	0.000590803	0.0299207	Rnmt	67897	RNA (guanine-7-) methyltransferase	protein-coding
ENSMUSG00000060475	1643.49	0.492308	0.274538	0.000609096	0.0306877	Wtap	60532	Wilms tumour 1-associating protein	protein-coding
ENSMUSG00000032014	9.58279	-2.90028	2.74979	0.000626768	0.0314119	Oaf	102644	out at first homolog	protein-coding
ENSMUSG00000108702	15.2473	2.39075	2.29386	0.000633982	0.0316148	Gm9333	668750	methionine aminopeptidase 2 pseudogene	pseudo
ENSMUSG00000066258	39.4799	-2.58797	2.47803	0.000640255	0.0318418	Trim12a	76681	tripartite motif-containing 12A	protein-coding
ENSMUSG00000112117	651.484	0.991407	0.87446	0.0006418	0.0318418	Rmst	110333	rhabdomyosarcoma 2 associated transcript (non-coding RNA)	ncRNA
ENSMUSG00000078444	49.5065	-0.898161	0.727252	0.000663011	0.0327276	Gm10941	100169878	predicted gene 10941	ncRNA
ENSMUSG00000020173	582.105	-0.786072	0.534605	0.000667584	0.0328385	Cobl	12808	cordon-bleu WH2 repeat	protein-coding
ENSMUSG00000053965	61.372	-1.64681	1.66105	0.000668627	0.0328385	Pde5a	242202	phosphodiesterase 5A, cGMP-specific	protein-coding
ENSMUSG00000036860	1974.39	-0.562232	0.328926	0.000684004	0.0335093	Mrpl55	67212	mitochondrial ribosomal protein L55	protein-coding
ENSMUSG00000020253	381.485	-1.06083	1.04201	0.000729555	0.0356513	Ppm1m	67905	protein phosphatase 1M	protein-coding
ENSMUSG00000001901	237.888	0.711375	0.467406	0.000750566	0.0365864	Kcnh6	192775	potassium voltage-gated channel, subfamily H (eag-related), member 6	protein-coding
ENSMUSG00000027678	549.879	0.535336	0.319886	0.000757189	0.0368171	Ncoa3	17979	nuclear receptor coactivator 3	protein-coding
ENSMUSG00000034875	3202.57	-0.674979	0.432426	0.000763418	0.0370277	Nudt19	110959	nudix (nucleoside diphosphate linked moiety X)-type motif 19	protein-coding
ENSMUSG00000055775	41.7911	-2.68856	2.754	0.000768784	0.0371954	Myh8	17885	myosin, heavy polypeptide 8, skeletal muscle, perinatal	protein-coding
ENSMUSG00000022048	6161.23	-0.505557	0.302104	0.000780054	0.0375543	Dpysl2	12934	dihydropyrimidinase-like 2	protein-coding
ENSMUSG00000037362	8678.97	-2.31172	2.39058	0.000782604	0.0375843	Ccn3	18133	cellular communication network factor 3	protein-coding
ENSMUSG00000040420	513.583	1.03393	1.04182	0.000790659	0.0378778	Cdh18	320865	cadherin 18	protein-coding
ENSMUSG00000071005	33.5752	1.55344	1.67231	0.000808209	0.0384454	Ccl19	24047	chemokine (C-C motif) ligand 19	protein-coding
ENSMUSG00000050855	951.181	0.548083	0.335349	0.000809849	0.0384454	Zfp940	233057	zinc finger protein 940	protein-coding
ENSMUSG00000055670	522.62	-0.586565	0.364343	0.000810395	0.0384454	Zzef1	195018	zinc finger, ZZ-type with EF hand domain 1	protein-coding
ENSMUSG00000096678	12.351	3.01436	3.23331	0.000821809	0.0388923	Trav9-4	630461	T cell receptor alpha variable 9-4	other
ENSMUSG00000031787	2649.18	0.375229	0.220576	0.000830206	0.0391946	Katnb1	74187	katanin p80 (WD40-containing) subunit B 1	protein-coding
ENSMUSG00000022860	3572.86	-2.59744	2.74293	0.000833121	0.0392372	Chodl	246048	chondrolectin	protein-coding
ENSMUSG00000047632	34.243	-1.07803	1.13964	0.000846988	0.0397941	Fgfbp3	72514	fibroblast growth factor binding protein 3	protein-coding
ENSMUSG00000064363	58043.6	-0.575365	0.362757	0.00086241	0.0404213	ND4	17719	NADH dehydrogenase subunit 4	protein-coding
ENSMUSG00000021951	1650.2	-0.422764	0.254764	0.000871479	0.0407484	Eef1akmt1	68043	EEF1A alpha lysine methyltransferase 1	protein-coding
ENSMUSG00000021423	225.176	-0.848548	0.780116	0.000894029	0.0416033	Ly86	17084	lymphocyte antigen 86	protein-coding
ENSMUSG00000035202	19263.1	-0.656614	0.444608	0.000911687	0.042324	Lars2	102436	leucyl-tRNA synthetase, mitochondrial	protein-coding
ENSMUSG00000036206	1052.29	0.530354	0.33509	0.000920156	0.0425284	Sh3bp4	98402	SH3-domain binding protein 4	protein-coding
ENSMUSG00000038879	444.303	0.579259	0.373719	0.000920453	0.0425284	Nipal2	223473	NIPA-like domain containing 2	protein-coding
ENSMUSG00000036655	10.496	-2.80958	3.1338	0.000923426	0.0425649	Colec11	71693	collectin sub-family member 11	protein-coding
ENSMUSG00000017737	244.115	-0.967998	1.01883	0.000926108	0.0425878	Mmp9	17395	matrix metallopeptidase 9	protein-coding
ENSMUSG00000006435	1018.96	0.574086	0.373519	0.000951454	0.0436505	Neurl1a	18011	neuralized E3 ubiquitin protein ligase 1A	protein-coding
ENSMUSG00000079179	1312.26	0.501616	0.319231	0.000975132	0.0443431	Rab10os	74173	RAB10, member RAS oncogene family, opposite strand	ncRNA
ENSMUSG00000064345	20771.8	-0.595104	0.398259	0.000997549	0.045233	ND2	17717	NADH dehydrogenase subunit 2	protein-coding
ENSMUSG00000019528	2415.08	-0.663108	0.472381	0.00100787	0.0455951	Gyg	27357	glycogenin	protein-coding
ENSMUSG00000019865	1029.25	-1.854	2.12722	0.0010145	0.0457888	Nmbr	18101	neuromedin B receptor	protein-coding
ENSMUSG00000025006	2408.3	0.645072	0.454522	0.00102707	0.0459705	Sorbs1	20411	sorbin and SH3 domain containing 1	protein-coding
ENSMUSG00000030123	343.857	-1.33669	1.56547	0.00102769	0.0459705	Plxnd1	67784	plexin D1	protein-coding
ENSMUSG00000046959	129.657	0.728462	0.584431	0.00102796	0.0459705	Slc26a1	231583	solute carrier family 26 (sulfate transporter), member 1	protein-coding
ENSMUSG00000087479	266.491	0.70911	0.54907	0.00103416	0.0460046	Gm16835	102635192	predicted gene, 16835	ncRNA
ENSMUSG00000044681	82.4044	2.99113	3.8898	0.00103715	0.0460046	Cnpy1	269637	canopy FGF signaling regulator 1	protein-coding
ENSMUSG00000028601	142.475	-0.76549	0.674283	0.00103808	0.0460046	Echdc2	52430	enoyl Coenzyme A hydratase domain containing 2	protein-coding
ENSMUSG00000039106	298.85	0.820917	0.806114	0.00104052	0.0460046	Htr5a	15563	5-hydroxytryptamine (serotonin) receptor 5A	protein-coding
ENSMUSG00000050088	902.463	0.523857	0.345162	0.00106214	0.0468544	1600012H06Rik	67912	RIKEN cDNA 1600012H06 gene	protein-coding
ENSMUSG00000024300	82.7105	-0.984	1.12023	0.00107281	0.047218	Myo1f	17916	myosin IF	protein-coding
ENSMUSG00000092253	11.3251	2.56309	3.0195	0.00107843	0.0472523	H2-Q3	625285	histocompatibility 2, Q region locus 3	pseudo
ENSMUSG00000037622	74.5654	-0.917268	1.01576	0.00108317	0.0473533	Wdtc1	230796	WD and tetratricopeptide repeats 1	protein-coding
ENSMUSG00000053153	83.8931	1.39322	1.66772	0.00109645	0.0477202	Spag16	66722	sperm associated antigen 16	protein-coding
ENSMUSG00000110105	261.838	-0.857149	0.921123	0.00111525	0.04843	Vmn2r29	76229	vomeronasal 2, receptor 29	protein-coding
ENSMUSG00000038276	13.8526	-2.40691	2.8759	0.00113714	0.0492712	Asic3	171209	acid-sensing (proton-gated) ion channel 3	protein-coding
ENSMUSG00000045410	1079.48	-0.668229	0.513933	0.00115135	0.0497762	Akr1e1	56043	aldo-keto reductase family 1, member E1	protein-coding
ENSMUSG00000074971	220.041	-0.938504	1.08667	0.00115702	0.0498387	Fibin	67606	fin bud initiation factor homolog (zebrafish)	protein-coding
ENSMUSG00000079491	43.5208	1.41726	1.72737	0.00115791	0.0498387	H2-T10	15024	histocompatibility 2, T region locus 10	protein-coding
