# Supplementary material for: Nigral transcriptomic profiles in Engrailed-1 hemizygous mouse models of Parkinson’s disease reveal upregulation of oxidative phosphorylation-related genes associated with delayed dopaminergic neurodegeneration
Source: Front Aging Neurosci. 2024 Feb 5;16:1337365. doi: 10.3389/fnagi.2024.1337365 (PMC10875038; doi:10.3389/fnagi.2024.1337365)
Supplement: Supplementary file 4 [file Table_2.XLSX]

## Sheet: OF1 vs C57 EN1 GO enrichment
	ONTOLOGY	ID	Description	GeneRatio	BgRatio	pvalue	p.adjust	qvalue	geneID	Count
GO:0070469	CC	GO:0070469	respirasome	5/123	86/15642	0.000580465	0.0352104	0.0344383	ND1/ND4L/ND6/ND4/ND2	5
GO:0005747	CC	GO:0005747	mitochondrial respiratory chain complex I	4/123	49/15642	0.000586841	0.0352104	0.0344383	ND1/ND4L/ND4/ND2	4
GO:0030964	CC	GO:0030964	NADH dehydrogenase complex	4/123	49/15642	0.000586841	0.0352104	0.0344383	ND1/ND4L/ND4/ND2	4
GO:0045271	CC	GO:0045271	respiratory chain complex I	4/123	49/15642	0.000586841	0.0352104	0.0344383	ND1/ND4L/ND4/ND2	4
GO:0003954	MF	GO:0003954	NADH dehydrogenase activity	5/125	28/15416	2.73740369533575e-06	0.000985465	0.000922073	ND1/ND4L/ND6/ND4/ND2	5
GO:0008137	MF	GO:0008137	NADH dehydrogenase (ubiquinone) activity	4/125	25/15416	4.56697631598364e-05	0.00548037	0.00512783	ND4L/ND6/ND4/ND2	4
GO:0050136	MF	GO:0050136	NADH dehydrogenase (quinone) activity	4/125	25/15416	4.56697631598364e-05	0.00548037	0.00512783	ND4L/ND6/ND4/ND2	4
GO:0003955	MF	GO:0003955	NAD(P)H dehydrogenase (quinone) activity	4/125	28/15416	7.25423972849165e-05	0.00652882	0.00610883	ND4L/ND6/ND4/ND2	4
GO:0030145	MF	GO:0030145	manganese ion binding	5/125	59/15416	0.00011408	0.00821377	0.0076854	Nudt7/Abl2/Xpnpep1/Ppm1m/Gyg	5
GO:0016655	MF	GO:0016655	oxidoreductase activity, acting on NAD(P)H, quinone or similar compound as acceptor	4/125	33/15416	0.000140507	0.00843043	0.00788812	ND4L/ND6/ND4/ND2	4
GO:0035255	MF	GO:0035255	ionotropic glutamate receptor binding	4/125	39/15416	0.000272018	0.0139895	0.0130896	Shank1/Rab4a/Gsk3b/ND2	4
GO:0016651	MF	GO:0016651	oxidoreductase activity, acting on NAD(P)H	5/125	73/15416	0.000312694	0.0140712	0.0131661	ND1/ND4L/ND6/ND4/ND2	5
GO:0015106	MF	GO:0015106	bicarbonate transmembrane transporter activity	3/125	21/15416	0.000622086	0.0248834	0.0232828	Slc26a6/Slc4a9/Slc26a1	3
GO:0015301	MF	GO:0015301	anion:anion antiporter activity	3/125	23/15416	0.000818615	0.026791	0.0250676	Slc26a6/Slc4a9/Slc26a1	3
GO:0140323	MF	GO:0140323	solute:anion antiporter activity	3/125	23/15416	0.000818615	0.026791	0.0250676	Slc26a6/Slc4a9/Slc26a1	3

## Sheet: OF1 vs C57 WT GO enrichment
	ONTOLOGY	ID	Description	GeneRatio	BgRatio	pvalue	p.adjust	qvalue	geneID	Count
GO:0002486	BP	GO:0002486	antigen processing and presentation of endogenous peptide antigen via MHC class I via ER pathway, TAP-independent	6/289	17/16052	3.3872e-07	0.000488912	0.000475533	H2-Q4/H2-T24/H2-M5/Gm8909/H2-T22/Gm11127	6
GO:0002476	BP	GO:0002476	antigen processing and presentation of endogenous peptide antigen via MHC class Ib	6/289	18/16052	5.00422e-07	0.000488912	0.000475533	H2-Q4/H2-T24/H2-M5/Gm8909/H2-T22/Gm11127	6
GO:0002484	BP	GO:0002484	antigen processing and presentation of endogenous peptide antigen via MHC class I via ER pathway	6/289	18/16052	5.00422e-07	0.000488912	0.000475533	H2-Q4/H2-T24/H2-M5/Gm8909/H2-T22/Gm11127	6
GO:0002428	BP	GO:0002428	antigen processing and presentation of peptide antigen via MHC class Ib	6/289	19/16052	7.20366e-07	0.000563038	0.00054763	H2-Q4/H2-T24/H2-M5/Gm8909/H2-T22/Gm11127	6
GO:0002475	BP	GO:0002475	antigen processing and presentation via MHC class Ib	6/289	22/16052	1.89285e-06	0.00123287	0.00119913	H2-Q4/H2-T24/H2-M5/Gm8909/H2-T22/Gm11127	6
GO:0002474	BP	GO:0002474	antigen processing and presentation of peptide antigen via MHC class I	7/289	35/16052	2.48922e-06	0.0013897	0.00135166	H2-Q4/H2-T24/H2-M5/Gm8909/Calr/H2-T22/Gm11127	7
GO:0002483	BP	GO:0002483	antigen processing and presentation of endogenous peptide antigen	6/289	25/16052	4.29305e-06	0.00186414	0.00181312	H2-Q4/H2-T24/H2-M5/Gm8909/H2-T22/Gm11127	6
GO:0019885	BP	GO:0019885	antigen processing and presentation of endogenous peptide antigen via MHC class I	6/289	25/16052	4.29305e-06	0.00186414	0.00181312	H2-Q4/H2-T24/H2-M5/Gm8909/H2-T22/Gm11127	6
GO:0048002	BP	GO:0048002	antigen processing and presentation of peptide antigen	8/289	54/16052	5.08268e-06	0.00198631	0.00193195	H2-Q4/H2-T24/H2-M5/H2-Aa/Gm8909/Calr/H2-T22/Gm11127	8
GO:0019883	BP	GO:0019883	antigen processing and presentation of endogenous antigen	6/289	27/16052	6.96136e-06	0.00247318	0.0024055	H2-Q4/H2-T24/H2-M5/Gm8909/H2-T22/Gm11127	6
GO:0001916	BP	GO:0001916	positive regulation of T cell mediated cytotoxicity	6/289	31/16052	1.6298e-05	0.00502844	0.00489083	H2-Q4/H2-T24/H2-M5/Gm8909/H2-T22/Gm11127	6
GO:0002709	BP	GO:0002709	regulation of T cell mediated immunity	8/289	64/16052	1.8505e-05	0.00504252	0.00490452	H2-Q4/Gata3/H2-T24/H2-M5/Gm8909/H2-T22/Gm11127/Hmgb1	8
GO:0002711	BP	GO:0002711	positive regulation of T cell mediated immunity	7/289	47/16052	1.93546e-05	0.00504252	0.00490452	H2-Q4/Gata3/H2-T24/H2-M5/Gm8909/H2-T22/Gm11127	7
GO:0001914	BP	GO:0001914	regulation of T cell mediated cytotoxicity	6/289	34/16052	2.84499e-05	0.00674802	0.00656335	H2-Q4/H2-T24/H2-M5/Gm8909/H2-T22/Gm11127	6
GO:0001912	BP	GO:0001912	positive regulation of leukocyte mediated cytotoxicity	7/289	50/16052	2.93542e-05	0.00674802	0.00656335	H2-Q4/H2-T24/H2-M5/Gm8909/Ulbp1/H2-T22/Gm11127	7
GO:0019882	BP	GO:0019882	antigen processing and presentation	9/289	95/16052	5.32512e-05	0.0115614	0.011245	H2-Q4/H2-T24/H2-M5/H2-Aa/Gm8909/Ccl19/Calr/H2-T22/Gm11127	9
GO:0031343	BP	GO:0031343	positive regulation of cell killing	7/289	56/16052	6.21599e-05	0.0127853	0.0124354	H2-Q4/H2-T24/H2-M5/Gm8909/Ulbp1/H2-T22/Gm11127	7
GO:0001913	BP	GO:0001913	T cell mediated cytotoxicity	6/289	44/16052	0.000128408	0.0250909	0.0244043	H2-Q4/H2-T24/H2-M5/Gm8909/H2-T22/Gm11127	6
GO:0001910	BP	GO:0001910	regulation of leukocyte mediated cytotoxicity	7/289	66/16052	0.000179086	0.0305843	0.0297473	H2-Q4/H2-T24/H2-M5/Gm8909/Ulbp1/H2-T22/Gm11127	7
GO:0034142	BP	GO:0034142	toll-like receptor 4 signaling pathway	5/289	30/16052	0.00018	0.0305843	0.0297473	Wdfy1/Mfhas1/Pik3ap1/Appl2/Hmgb1	5
GO:0002708	BP	GO:0002708	positive regulation of lymphocyte mediated immunity	8/289	91/16052	0.000233722	0.0380577	0.0370162	H2-Q4/Gata3/H2-T24/H2-M5/Gm8909/Ulbp1/H2-T22/Gm11127	8
GO:0002456	BP	GO:0002456	T cell mediated immunity	8/289	92/16052	0.000252051	0.0387795	0.0377182	H2-Q4/Gata3/H2-T24/H2-M5/Gm8909/H2-T22/Gm11127/Hmgb1	8
GO:0034143	BP	GO:0034143	regulation of toll-like receptor 4 signaling pathway	4/289	18/16052	0.000258	0.0387795	0.0377182	Wdfy1/Mfhas1/Appl2/Hmgb1	4
GO:0009897	CC	GO:0009897	external side of plasma membrane	16/289	308/16052	0.000152806	0.0284365	0.0276583	H2-Q4/H2-T24/H2-M5/H2-Aa/Gm8909/Ccl19/Ulbp1/Calr/Gfra1/H2-T22/Gm11127/Btnl10/Fcmr/Il6st/Vwf/Il11ra2	16
GO:0042605	MF	GO:0042605	peptide antigen binding	7/289	23/16052	1.0921e-07	0.000426794	0.000415115	H2-Q4/H2-T24/H2-M5/H2-Aa/Gm8909/H2-T22/Gm11127	7
GO:0003823	MF	GO:0003823	antigen binding	7/289	46/16052	1.67272e-05	0.00502844	0.00489083	H2-Q4/H2-T24/H2-M5/H2-Aa/Gm8909/H2-T22/Gm11127	7

## Sheet: OF1 En1 vs WT GO enrichment
	ONTOLOGY	ID	Description	GeneRatio	BgRatio	pvalue	p.adjust	qvalue	geneID	Count
GO:0030595	BP	GO:0030595	leukocyte chemotaxis	10/191	163/16052	2.56379e-05	0.00491755	0.00432957	Slit2/Ccn3/Vav3/Dpp4/Anxa1/Tirap/Tafa4/Zfp580/C5ar1/S1pr1	10
GO:0097529	BP	GO:0097529	myeloid leukocyte migration	10/191	163/16052	2.56379e-05	0.00491755	0.00432957	Slit2/Ccn3/Vav3/Dpp4/Anxa1/Tirap/Tafa4/C5ar1/Prtn3/P2ry12	10
GO:0050920	BP	GO:0050920	regulation of chemotaxis	10/191	189/16052	8.97733e-05	0.0117776	0.0103694	Slit2/Plxna4/Ccn3/Dpp4/Sema3a/Tirap/Zfp580/C5ar1/S1pr1/P2ry12	10
GO:0043542	BP	GO:0043542	endothelial cell migration	10/191	199/16052	0.000137411	0.0167396	0.0147381	Gata3/Slit2/Plxnd1/Ccn3/Nos3/Dpp4/Anxa1/Rhob/Zfp580/Emp2	10
GO:0060326	BP	GO:0060326	cell chemotaxis	10/191	228/16052	0.000410286	0.0331438	0.0291809	Slit2/Ccn3/Vav3/Dpp4/Anxa1/Tirap/Tafa4/Zfp580/C5ar1/S1pr1	10
GO:0031644	BP	GO:0031644	regulation of nervous system process	11/191	171/16052	6.40586e-06	0.00338217	0.00297778	Avp/Tac1/Nos1/Ccn3/Nos3/Il33/Cck/Tafa4/Nptxr/Jam2/Ctsc	11
GO:0002685	BP	GO:0002685	regulation of leukocyte migration	11/191	173/16052	7.15925e-06	0.00338217	0.00297778	Slit2/Ccn3/Il33/Dpp4/Anxa1/Tirap/Zfp580/Jam2/Icam1/C5ar1/P2ry12	11
GO:0046883	BP	GO:0046883	regulation of hormone secretion	11/191	255/16052	0.000244462	0.0277953	0.0244719	Tac1/Nos1/Nr0b2/Ccn3/Sct/Ucn3/Anxa1/Kiss1r/Slc16a1/Tcf7l2/C1qtnf12	11
GO:0050867	BP	GO:0050867	positive regulation of cell activation	11/191	284/16052	0.000607407	0.0414373	0.0364828	Gata3/Tac1/Ccn2/Vav3/Il33/Dpp4/Anxa1/Tirap/Il2rg/Ctsc/Ephb6	11
GO:0002791	BP	GO:0002791	regulation of peptide secretion	11/191	291/16052	0.000742576	0.0460532	0.0405468	Nos1/Nr0b2/Ttn/Ccn3/Sct/Ucn3/Anxa1/Ang/Slc16a1/Tcf7l2/C1qtnf12	11
GO:1903532	BP	GO:1903532	positive regulation of secretion by cell	12/191	307/16052	0.000317456	0.0302585	0.0266406	Avp/Tac1/Nr0b2/Ttn/Sct/Ucn3/Cck/Ang/Kiss1r/Dpysl2/Tcf7l2/C1qtnf12	12
GO:0032103	BP	GO:0032103	positive regulation of response to external stimulus	12/191	315/16052	0.000400342	0.0331438	0.0291809	Tac1/Slit2/Coch/Il33/Parp9/Tirap/Tgm2/Zfp580/C5ar1/Ctsc/S1pr1/P2ry12	12
GO:0051047	BP	GO:0051047	positive regulation of secretion	12/191	328/16052	0.000573876	0.0414373	0.0364828	Avp/Tac1/Nr0b2/Ttn/Sct/Ucn3/Cck/Ang/Kiss1r/Dpysl2/Tcf7l2/C1qtnf12	12
GO:0062023	CC	GO:0062023	collagen-containing extracellular matrix	12/191	329/16052	0.000589507	0.0414373	0.0364828	Ntng2/Slit2/Zp1/Ccn3/Coch/Adamts2/Nid1/Plxna2/Anxa1/Tgm2/Ang/Ctsc	12
GO:0010631	BP	GO:0010631	epithelial cell migration	13/191	276/16052	2.70685e-05	0.00491755	0.00432957	Gata3/Tac1/Slit2/Plxnd1/Ccn3/Nos3/Dpp4/Anxa1/Zeb2/Rhob/Sema3a/Zfp580/Emp2	13
GO:0090132	BP	GO:0090132	epithelium migration	13/191	277/16052	2.81093e-05	0.00491755	0.00432957	Gata3/Tac1/Slit2/Plxnd1/Ccn3/Nos3/Dpp4/Anxa1/Zeb2/Rhob/Sema3a/Zfp580/Emp2	13
GO:0090130	BP	GO:0090130	tissue migration	13/191	278/16052	2.91849e-05	0.00491755	0.00432957	Gata3/Tac1/Slit2/Plxnd1/Ccn3/Nos3/Dpp4/Anxa1/Zeb2/Rhob/Sema3a/Zfp580/Emp2	13
GO:0046879	BP	GO:0046879	hormone secretion	13/191	310/16052	8.90399e-05	0.0117776	0.0103694	Gata3/Tac1/Nos1/Nr0b2/Ccn3/Sct/Ucn3/Anxa1/Cga/Kiss1r/Slc16a1/Tcf7l2/C1qtnf12	13
GO:0009914	BP	GO:0009914	hormone transport	14/191	316/16052	2.61148e-05	0.00491755	0.00432957	Gata3/Tac1/Nos1/Nr0b2/Ccn3/Sct/Slco1c1/Ucn3/Anxa1/Cga/Kiss1r/Slc16a1/Tcf7l2/C1qtnf12	14
GO:0007409	BP	GO:0007409	axonogenesis	14/191	438/16052	0.000775336	0.0469702	0.0413541	Gata3/Ntng2/Slit2/Plxna4/Numb/Plxnd1/Map6/Plxna2/Cck/Zeb2/Sema3a/Dpysl2/Ephb6/Cobl	14
GO:0010817	BP	GO:0010817	regulation of hormone levels	14/191	443/16052	0.000865191	0.0475995	0.0419082	Gata3/Tac1/Nos1/Nr0b2/Ccn3/Sct/Slco1c1/Ucn3/Anxa1/Cga/Kiss1r/Slc16a1/Tcf7l2/C1qtnf12	14
GO:0030312	CC	GO:0030312	external encapsulating structure	14/191	435/16052	0.000725316	0.0458158	0.0403377	Ntng2/Slit2/Zp1/Ccn2/Ccn3/Coch/Lingo4/Adamts2/Nid1/Plxna2/Anxa1/Tgm2/Ang/Ctsc	14
GO:0031012	CC	GO:0031012	extracellular matrix	14/191	435/16052	0.000725316	0.0458158	0.0403377	Ntng2/Slit2/Zp1/Ccn2/Ccn3/Coch/Lingo4/Adamts2/Nid1/Plxna2/Anxa1/Tgm2/Ang/Ctsc	14
GO:0048732	BP	GO:0048732	gland development	15/191	367/16052	3.41907e-05	0.00530111	0.00466727	Pax3/Gata3/Slit2/Nr0b2/Plxnd1/Pitx2/Ccnb2/Irf6/Anxa1/Sema3a/Tgm2/Cga/Eda/Cobl/Tcf7l2	15
GO:0050900	BP	GO:0050900	leukocyte migration	16/191	279/16052	2.32993e-07	0.000575152	0.000506383	Gata3/Slit2/Ccn3/Vav3/Il33/Dpp4/Anxa1/Tirap/Tafa4/Zfp580/Jam2/Icam1/C5ar1/S1pr1/Prtn3/P2ry12	16
GO:0048018	MF	GO:0048018	receptor ligand activity	16/191	298/16052	5.6484e-07	0.000575152	0.000506383	Avp/Tac1/Slit2/Ccn2/Ccn3/Sct/Il33/Dpp4/Ucn3/Cck/Sema3a/Tafa4/Cga/Fgf15/Eda/C1qtnf12	16
GO:0030546	MF	GO:0030546	signaling receptor activator activity	16/191	302/16052	6.74467e-07	0.000575152	0.000506383	Avp/Tac1/Slit2/Ccn2/Ccn3/Sct/Il33/Dpp4/Ucn3/Cck/Sema3a/Tafa4/Cga/Fgf15/Eda/C1qtnf12	16
GO:0001667	BP	GO:0001667	ameboidal-type cell migration	17/191	398/16052	5.66992e-06	0.00338217	0.00297778	Pax3/Gata3/Tac1/Slit2/Plxnd1/Pitx2/Ccn3/Nos3/Dpp4/Anxa1/Zeb2/Rhob/Sema3a/Zfp580/Emp2/Fgf15/P2ry12	17
GO:0007015	BP	GO:0007015	actin filament organization	17/191	410/16052	8.38083e-06	0.00338217	0.00297778	Tac1/Slit2/Ccn2/Ttn/Grb2/Tle6/Sorbs3/Rhob/Kiss1r/Ush1c/Sptb/Icam1/Emp2/Tpm4/S1pr1/Cobl/Arhgap18	17
GO:0030545	MF	GO:0030545	receptor regulator activity	17/191	329/16052	4.23219e-07	0.000575152	0.000506383	Avp/Tac1/Slit2/Ccn2/Ccn3/Sct/Il33/Dkkl1/Dpp4/Ucn3/Cck/Sema3a/Tafa4/Cga/Fgf15/Eda/C1qtnf12	17
GO:0001525	BP	GO:0001525	angiogenesis	18/191	474/16052	1.49131e-05	0.00462441	0.00407148	Slit2/Ccn2/Plxnd1/Pitx2/Aplnr/Ccn3/Nos3/Vav3/Anxa1/Rhob/Elk3/Ang/Emp2/Btg1/Esm1/C5ar1/Ptprb/S1pr1	18
GO:0006935	BP	GO:0006935	chemotaxis	18/191	484/16052	1.97096e-05	0.00491755	0.00432957	Gata3/Slit2/Plxna4/Plxnd1/Ccn3/Vav3/Plxna2/Dpp4/Anxa1/Sema3a/Tirap/Tafa4/Zfp580/C5ar1/Dpysl2/Ephb6/S1pr1/P2ry12	18
GO:0042330	BP	GO:0042330	taxis	18/191	489/16052	2.25904e-05	0.00491755	0.00432957	Gata3/Slit2/Plxna4/Plxnd1/Ccn3/Vav3/Plxna2/Dpp4/Anxa1/Sema3a/Tirap/Tafa4/Zfp580/C5ar1/Dpysl2/Ephb6/S1pr1/P2ry12	18
GO:0007512	BP	GO:0007512	adult heart development	3/191	12/16052	0.000337092	0.0302585	0.0266406	Ttn/Aplnr/Myh7	3
GO:0002689	BP	GO:0002689	negative regulation of leukocyte chemotaxis	3/191	15/16052	0.000679053	0.0445433	0.0392174	Slit2/Ccn3/Dpp4	3
GO:0014049	BP	GO:0014049	positive regulation of glutamate secretion	3/191	15/16052	0.000679053	0.0445433	0.0392174	Avp/Cck/Dpysl2	3
GO:0003180	BP	GO:0003180	aortic valve morphogenesis	3/191	16/16052	0.000828463	0.0475012	0.0418216	Gata3/Slit2/Nos3	3
GO:0017154	MF	GO:0017154	semaphorin receptor activity	3/191	12/16052	0.000337092	0.0302585	0.0266406	Plxna4/Plxnd1/Plxna2	3
GO:1902287	BP	GO:1902287	semaphorin-plexin signaling pathway involved in axon guidance	4/191	12/16052	8.92394e-06	0.00338217	0.00297778	Plxna4/Plxnd1/Plxna2/Sema3a	4
GO:1902285	BP	GO:1902285	semaphorin-plexin signaling pathway involved in neuron projection guidance	4/191	13/16052	1.27703e-05	0.00435595	0.00383512	Plxna4/Plxnd1/Plxna2/Sema3a	4
GO:0031645	BP	GO:0031645	negative regulation of nervous system process	4/191	20/16052	8.10653e-05	0.0115214	0.0101438	Avp/Ccn3/Jam2/Ctsc	4
GO:0090022	BP	GO:0090022	regulation of neutrophil chemotaxis	4/191	28/16052	0.000318015	0.0302585	0.0266406	Slit2/Dpp4/Tirap/C5ar1	4
GO:0021952	BP	GO:0021952	central nervous system projection neuron axonogenesis	4/191	29/16052	0.000365487	0.031875	0.0280638	Slit2/Plxna4/Zeb2/Ephb6	4
GO:0007435	BP	GO:0007435	salivary gland morphogenesis	4/191	30/16052	0.000417819	0.0331438	0.0291809	Plxnd1/Sema3a/Tgm2/Eda	4
GO:0007431	BP	GO:0007431	salivary gland development	4/191	33/16052	0.000606748	0.0414373	0.0364828	Plxnd1/Sema3a/Tgm2/Eda	4
GO:0002686	BP	GO:0002686	negative regulation of leukocyte migration	4/191	36/16052	0.000849479	0.0475012	0.0418216	Slit2/Ccn3/Il33/Dpp4	4
GO:0045776	BP	GO:0045776	negative regulation of blood pressure	5/191	50/16052	0.000310634	0.0302585	0.0266406	Tac1/Nos1/Bdkrb2/Nos3/Kcnk6	5
GO:0001755	BP	GO:0001755	neural crest cell migration	5/191	52/16052	0.000373791	0.031875	0.0280638	Pax3/Pitx2/Zeb2/Sema3a/Fgf15	5
GO:0001756	BP	GO:0001756	somitogenesis	5/191	61/16052	0.000784901	0.0469702	0.0413541	Pax3/Ttn/Plxna2/Zeb2/Cobl	5
GO:0051930	BP	GO:0051930	regulation of sensory perception of pain	6/191	50/16052	2.6978e-05	0.00491755	0.00432957	Tac1/Nos1/Ccn3/Il33/Cck/Tafa4	6
GO:0051931	BP	GO:0051931	regulation of sensory perception	6/191	51/16052	3.02751e-05	0.00491755	0.00432957	Tac1/Nos1/Ccn3/Il33/Cck/Tafa4	6
GO:0035282	BP	GO:0035282	segmentation	6/191	85/16052	0.000526368	0.0408055	0.0359265	Pax3/Ttn/Plxna2/Zeb2/Sema3a/Cobl	6
GO:1990266	BP	GO:1990266	neutrophil migration	6/191	86/16052	0.00056033	0.0414373	0.0364828	Slit2/Vav3/Dpp4/Tirap/C5ar1/Prtn3	6
GO:0071621	BP	GO:0071621	granulocyte chemotaxis	6/191	87/16052	0.00059597	0.0414373	0.0364828	Slit2/Vav3/Dpp4/Anxa1/Tirap/C5ar1	6
GO:0002456	BP	GO:0002456	T cell mediated immunity	6/191	92/16052	0.000801355	0.0471279	0.041493	Gata3/Dpp4/Icam1/Emp2/Ctsc/Ephb6	6
GO:0002688	BP	GO:0002688	regulation of leukocyte chemotaxis	6/191	93/16052	0.000848281	0.0475012	0.0418216	Slit2/Ccn3/Dpp4/Tirap/Zfp580/C5ar1	6
GO:0005179	MF	GO:0005179	hormone activity	6/191	66/16052	0.000131769	0.0166468	0.0146564	Avp/Sct/Ucn3/Cck/Cga/C1qtnf12	6
GO:0097530	BP	GO:0097530	granulocyte migration	7/191	109/16052	0.000324244	0.0302585	0.0266406	Slit2/Vav3/Dpp4/Anxa1/Tirap/C5ar1/Prtn3	7
GO:0071674	BP	GO:0071674	mononuclear cell migration	8/191	131/16052	0.00017245	0.0202837	0.0178585	Gata3/Slit2/Ccn3/Anxa1/Jam2/Icam1/C5ar1/S1pr1	8
GO:0008360	BP	GO:0008360	regulation of cell shape	8/191	144/16052	0.00032902	0.0302585	0.0266406	Plxna4/Plxnd1/Coch/Plxna2/Anxa1/Rhob/Icam1/Arhgap18	8
GO:0015718	BP	GO:0015718	monocarboxylic acid transport	9/191	146/16052	6.3002e-05	0.00934348	0.00822631	Avp/Bdkrb2/Slco1c1/Cck/Anxa1/Kiss1r/Dpysl2/Slc16a1/Slc1a5	9
GO:0007416	BP	GO:0007416	synapse assembly	9/191	180/16052	0.000307995	0.0302585	0.0266406	Ntng2/Numb/Plxnd1/Lingo4/Pdlim5/Pcdh17/Nptxr/2610042L04Rik/Il1rapl2	9

## Sheet: C57 En1 vs WT GO enrichment
	ONTOLOGY	ID	Description	GeneRatio	BgRatio	pvalue	p.adjust	qvalue	geneID	Count
GO:0042773	BP	GO:0042773	ATP synthesis coupled electron transport	4/46	61/15536	3.10241311139226e-05	0.0281699	0.0261582	COX3/COX2/CYTB/COX1	4
GO:0022904	BP	GO:0022904	respiratory electron transport chain	4/46	78/15536	8.17429293082423e-05	0.030076	0.0279282	COX3/COX2/CYTB/COX1	4
GO:0022900	BP	GO:0022900	electron transport chain	4/46	82/15536	9.93699313226321e-05	0.030076	0.0279282	COX3/COX2/CYTB/COX1	4
GO:0070069	CC	GO:0070069	cytochrome complex	4/47	28/15642	1.38930942152164e-06	0.0002209	0.000185729	COX3/COX2/CYTB/COX1	4
GO:0098803	CC	GO:0098803	respiratory chain complex	5/47	78/15642	3.52615761757872e-06	0.00028033	0.000235696	COX3/COX2/Ndufa1/CYTB/COX1	5
GO:0070469	CC	GO:0070469	respirasome	5/47	86/15642	5.71372866150627e-06	0.000302828	0.000254612	COX3/COX2/Ndufa1/CYTB/COX1	5
GO:0045277	CC	GO:0045277	respiratory chain complex IV	3/47	18/15642	2.01007778679375e-05	0.000799006	0.000671789	COX3/COX2/COX1	3
GO:0005743	CC	GO:0005743	mitochondrial inner membrane	8/47	422/15642	3.28155342681832e-05	0.00104353	0.000877384	COX3/COX2/Ndufa1/Capn10/CYTB/Fpgs/COX1/Mrps21	8
GO:0019866	CC	GO:0019866	organelle inner membrane	8/47	462/15642	6.22626094769438e-05	0.00164996	0.00138725	COX3/COX2/Ndufa1/Capn10/CYTB/Fpgs/COX1/Mrps21	8
GO:0005750	CC	GO:0005750	mitochondrial respiratory chain complex III	2/47	11/15642	0.000477708	0.00949445	0.00798276	CYTB/COX1	2
GO:0045275	CC	GO:0045275	respiratory chain complex III	2/47	11/15642	0.000477708	0.00949445	0.00798276	CYTB/COX1	2
GO:0005746	CC	GO:0005746	mitochondrial respirasome	3/47	77/15642	0.00159159	0.0281181	0.0236412	Ndufa1/CYTB/COX1	3
GO:0004129	MF	GO:0004129	cytochrome-c oxidase activity	3/44	20/15416	2.39061715121873e-05	0.00114819	0.00101817	COX3/COX2/COX1	3
GO:0015002	MF	GO:0015002	heme-copper terminal oxidase activity	3/44	20/15416	2.39061715121873e-05	0.00114819	0.00101817	COX3/COX2/COX1	3
GO:0016676	MF	GO:0016676	oxidoreductase activity, acting on a heme group of donors, oxygen as acceptor	3/44	20/15416	2.39061715121873e-05	0.00114819	0.00101817	COX3/COX2/COX1	3
GO:0016675	MF	GO:0016675	oxidoreductase activity, acting on a heme group of donors	3/44	21/15416	2.78349675550916e-05	0.00114819	0.00101817	COX3/COX2/COX1	3
GO:0009055	MF	GO:0009055	electron transfer activity	4/44	82/15416	8.5847152900139e-05	0.00283296	0.00251216	COX3/COX2/CYTB/COX1	4

## Sheet: OF1 vs C57 En1 Reactome
No enrichment detected

## Sheet: OF1 vs C57 WT Reactome
No enrichment detected

## Sheet: OF1-En1 vs WT Reactome
Reactome
	ID	Description	GeneRatio	BgRatio	pvalue	p.adjust	qvalue	geneID	Count
R-MMU-500792	R-MMU-500792	GPCR ligand binding	17/102	384/8880	1.48898e-06	0.000594103	0.000578351	Avp/Tac1/Bdkrb2/Aplnr/Ptgfr/Nms/Vipr2/Sct/Nmbr/Ucn3/Cck/Anxa1/Cga/Kiss1r/C5ar1/S1pr1/P2ry12	17
R-MMU-373076	R-MMU-373076	Class A/1 (Rhodopsin-like receptors)	14/102	298/8880	7.04229e-06	0.00140494	0.00136769	Avp/Tac1/Bdkrb2/Aplnr/Ptgfr/Nms/Nmbr/Cck/Anxa1/Cga/Kiss1r/C5ar1/S1pr1/P2ry12	14
R-MMU-373755	R-MMU-373755	Semaphorin interactions	6/102	47/8880	1.4527e-05	0.00193209	0.00188087	Plxna4/Plxnd1/Plxna2/Rhob/Sema3a/Dpysl2	6
R-MMU-399956	R-MMU-399956	CRMPs in Sema3A signaling	4/102	15/8880	2.03239e-05	0.00202731	0.00197356	Plxna4/Plxna2/Sema3a/Dpysl2	4
R-MMU-375276	R-MMU-375276	Peptide ligand-binding receptors	10/102	185/8880	4.8941e-05	0.0039055	0.00380195	Avp/Tac1/Bdkrb2/Aplnr/Nms/Nmbr/Cck/Anxa1/Kiss1r/C5ar1	10
R-MMU-416476	R-MMU-416476	G alpha (q) signalling events	10/102	197/8880	8.31393e-05	0.00552876	0.00538218	Avp/Tac1/Bdkrb2/Ptgfr/Grb2/Nms/Nmbr/Cck/Anxa1/Kiss1r	10
R-MMU-422475	R-MMU-422475	Axon guidance	11/102	256/8880	0.00016143	0.00740602	0.00720966	Slit2/Plxna4/Numb/Plxnd1/Grb2/Vav3/Plxna2/Rhob/Sema3a/Dpysl2/Ephb6	11
R-MMU-399955	R-MMU-399955	SEMA3A-Plexin repulsion signaling by inhibiting Integrin adhesion	3/102	10/8880	0.000166538	0.00740602	0.00720966	Plxna4/Plxna2/Sema3a	3
R-MMU-9675108	R-MMU-9675108	Nervous system development	11/102	257/8880	0.000167053	0.00740602	0.00720966	Slit2/Plxna4/Numb/Plxnd1/Grb2/Vav3/Plxna2/Rhob/Sema3a/Dpysl2/Ephb6	11
R-MMU-399954	R-MMU-399954	Sema3A PAK dependent Axon repulsion	3/102	14/8880	0.00048854	0.0194928	0.0189759	Plxna4/Plxna2/Sema3a	3

## Sheet: C57 En1 vs WT Reactome
Reactome
	ID	Description	GeneRatio	BgRatio	pvalue	p.adjust	qvalue	geneID	Count
R-MMU-611105	R-MMU-611105	Respiratory electron transport	5/30	92/8880	1.24250109130224e-05	0.0016028264077799	0.00153023818613013	COX3/COX2/Ndufa1/CYTB/COX1	5
R-MMU-163200	R-MMU-163200	Respiratory electron transport, ATP synthesis by chemiosmotic coupling, and heat production by uncoupling proteins.	5/30	116/8880	3.82955554009311e-05	0.00247006332336006	0.00235819999047839	COX3/COX2/Ndufa1/CYTB/COX1	5
R-MMU-5628897	R-MMU-5628897	TP53 Regulates Metabolic Genes	4/30	71/8880	8.78883302562513e-05	0.00377919820101881	0.00360804724209874	COX3/COX2/Slc38a9/COX1	4
R-MMU-1428517	R-MMU-1428517	The citric acid (TCA) cycle and respiratory electron transport	5/30	166/8880	0.000209756995341529	0.00676466309976431	0.00645830748814708	COX3/COX2/Ndufa1/CYTB/COX1	5
R-MMU-9707564	R-MMU-9707564	Cytoprotection by HMOX1	4/30	108/8880	0.000444471035270791	0.0114673527099864	0.0109480233950911	COX3/COX2/Keap1/COX1	4
R-MMU-9711123	R-MMU-9711123	Cellular response to chemical stress	4/30	141/8880	0.00121113745177814	0.0260394552132301	0.0248601897996566	COX3/COX2/Keap1/COX1	4

## Sheet: OF1 vs C57 En1 Wikipathways
Wikipathways
	ID	Description	GeneRatio	BgRatio	pvalue	p.adjust	qvalue	geneID	Count
WP163	WP163	Cytoplasmic ribosomal proteins	8/74	81/4559	4.08386261922523e-05	0.00310373559061118	0.00305214995752623	619547/16898/20115/68436/20084/19933/16785/27367	8
WP1248	WP1248	Oxidative phosphorylation	6/74	54/4559	0.000207672157253457	0.00789154197563138	0.00776038061315552	17706/17716/17720/17722/17719/17717	6

## Sheet: OF1 vs C57 WT Wikipathways
No enrichment detected

[truncated: 6 more sheets: OF1 En1 vs WT Wikipathways, C57 En1 vs WT Wikipathways, OF1 vs C57 En1 KEGG pathway, OF1 vs C57 WT KEGG pathway, OF1 En1 vs WT KEGG pathway, C57 En1 vs WT KEGG pathway]
